# Supplementary material
Source: publisher figshare collection journal article supplement (https://future-science-group.figshare.com/ndownloader/files/27655269)
Supplement: Supplementary file 1 [file 27655269]

## Sheet: Supplementary Table 1
Supplementary Table 1. Primes for MeRIP-qPCR validation
GeneName	Transcript ID	PeakID	Locus of m6A peak	Forward primer (5’-3’)	Reverse primer (5’-3’)
NR4A3	NM_006981	diffreps_peak_35277	chr9: 102584136-102584360	CATAAATGACGTGCCGAGAG	TGTCTGTGTGTGCGAGTGAG
		diffreps_peak_35278	chr9: 102587940-102588114	CTGAGCCTGGACCCTTAGC	GTATCTTGCGCGCTGAATG
		diffreps_peak_35279	chr9: 102590341-102590800	CGACTACACCAAGCTGACCA	ATTTGGTACACGCAGGAAGG
TRIB1	NM_025195	diffreps_peak_33738	chr8: 126442562-126443504	GTCTCGCTCGCTCTCATACA	CACTTCCCAAAGCGATGAGT
		diffreps_peak_33739	chr8: 126445558-126445851	AAGTGATCCTTGGGGAAACC	CGCACATAGGAGTGCATGTC
CTA-29F11.1	ENST00000564152	diffreps_peak_21600	chr22: 47157790-47158460	GGCCTAATCCCCAGTCTCTC	ATTTGCAGTGCAGTGAGGTG
SERPINA1	ENST00000556091	diffreps_peak_10671	chr14: 94849301-94849716	ATAGGCTGAAGGCGAACTCA	ATGCTGCCCAGAAGACAGAT
		diffreps_peak_10672	chr14: 94854896-94855020	GCCTGAAGCTGAGGAGACAG	ATATTCACCAGCAGCCTCCC
		diffreps_peak_10674	chr14: 94856756-94857029	CCTGTGGAACTGAGTGAGCA	GCTTGAGGAGAGCTTGAGGA
TLR8	NM_016610	diffreps_peak_36123	chrX: 12937162-12937820	GCTGACCTGCATTTTCCTGC	CCGTTTGGGGAACTTCCTGT
CXCR4	NM_003467	diffreps_peak_18418	chr2: 136872361-136872820	GAAGAAAGCTAGGGCCTCGG	GCCTGTTGGCTGCCTTACTA
		diffreps_peak_18419	chr2: 136873041-136873300	GGTAGCGGTCCAGACTGATG	ATGCAAGGCAGTCCATGTCA

## Sheet: Supplementary Table 2
Supplementary Table 2. Clinical characteristics of CAD patients and healthy controls
Variable	CAD	Control	P-value
Number, n	56	30	——
Age, years	49.91±6.10	53.03±1.56	0.02a
SBP, mmHg	125.43±16.66	129.00±13.04	0.14a
DBP, mmHg	77.93±11.84	80.52±9.17	0.26
TC, mg/dl	148.07±33.91	179.53±27.87	1.7e-05
TG, mg/dl (interquartile range)	142.48(109.96,192.04)	163.70(99.22,240.72)	0.53a
LDL, mg/dl	87.03±29.21	96.06±27.65	0.17
HDL, mg/dl	36.73±9.03	50.56±14.08	0.00a
Glucose, mg/dl	92.48±13.02	92.70±10.15	0.93
BMI, kg/m2	26.34±3.04	25.54±3.13	0.26
Smoke, n(%)	42(75.00)	26(86.67)	0.27b
Alcohol intake, n(%)	33(58.93)	21(70.00)	0.44
Hypertension, n(%)	51(91.07)	11(57.89)	0.00b
Diabetes mellitus,n(%)	3(5.36)	0(0.00)	0.55b
Lipid-lowering agents rate,n(%)	53(94.64)	0(0.00)	0.00b
Type (AMI/UA/SA)	17/19/20	——	——
Data were presented as mean ± SD, median and interquartile range (Q1, Q3) or n (%). Abbreviations: AMI, acute myocardial infarction; BMI, body mass index; DBP, diastolic blood pressure; HDL, high-density lipoprotein; LDL, low-density lipoprotein; SA, stable angina; SBP, systolic blood pressure; TC, total cholesterol; TG, triglyceride; UA,unstable angina.
a: Skewed data were analyzed using Mann-Whitney U-test
b: Fisher's exact test

## Sheet: Supplementary Table 3
Supplementary Table 3. Clinical Characteristics of CAD patients and healthy controls selected for MeRIP-seq
Variable	CAD	Control	P-value
Number, n	5	5	——
Age, years	55.7±3.78	52.38±2.08	0.134621
SBP, mmHg	120.8±13.16	127.47±13.76	0.45625
DBP, mmHg	75.4±12.48	77.27±6.34	0.77575
TC, mg/dl	183.86±37.33	173.86±30.21	0.6544
TG, mg/dl	139.82(100.88,192.04)	170.4(77.4,261.5)	0.84127
LDL, mg/dl	117.92±31.8	90.28±23.64	0.160684
HDL, mg/dl	39.38±6.96	50.52±14.41	0.172678
Glucose, mg/dl	96.91±7.71	91.66±14.28	0.495842
BMI, kg/m2	27.93±2.87	25.62±4.67	0.393698
Smoke, n(%)	4(80%)	4(80%)	1.00b
Alcohol intake, n(%)	2(40%)	4(80%)	0.52b
Hypertension, n(%)	4(80%)	2(40%)	0.52b
Diabetes mellitus, n(%)	0(0%)	0(0%)	1.00b
Lipid-lowering agents rate, n(%)	5(100%)	0(0%)	0.00b
Data were presented as mean ± SD, median and interquartile range (Q1, Q3) or n (%). Abbreviations: AMI, acute myocardial infarction; BMI, body mass index; DBP, diastolic blood pressure; HDL, high-density lipoprotein; LDL, low-density lipoprotein; SA, stable angina; SBP, systolic blood pressure; TC, total cholesterol; TG, triglyceride; UA,unstable angina.
a: Skewed data were analyzed using Mann-Whitney U-test
b: Fisher's exact test

## Sheet: Supplementary Table 4
Supplementary Table 4. The top 10 differentially methylated m6A peaks in lncRNAs
Gene name	Transcript ID	Chromsome	Peak ID	Peak start	Peak end	Fold change	P-value	Regulation
LINC01296	NR_122111	chr14	diffreps_peak_9697	19883221	19883500	105.7	2.56e-09	up
SEC1P	NR_004401	chr19	diffreps_peak_16277	49183281	49183640	81.9	2.08e-09	up
AP000525.9	ENST00000437781	chr22	diffreps_peak_20984	16150961	16151280	69.6	2.6e-08	up
ABHD12B	ENST00000554241	chr14	diffreps_peak_10018	51357985	51358060	62.8	6.89e-08	up
LOC375196	NR_028386	chr2	diffreps_peak_17155	39186621	39186920	60.3	1.19e-07	up
RP11-539I5.1	ENST00000453491	chr10	diffreps_peak_4934	118592521	118592884	55	3.95e-07	up
WBP11P1	NR_003558	chr18	diffreps_peak_14675	30092541	30093000	45.3	4.98e-07	down
LINC00940	NR_036546	chr12	diffreps_peak_6924	2038481	2038680	41.2	1.92e-05	up
LOC101927053	NR_110209	chr2	diffreps_peak_17926	97590921	97591120	39.7	2.21e-05	up
LINC01530	NR_034159	chr19	diffreps_peak_16360	52097281	52097480	39	2.62e-05	up

## Sheet: Supplementary Table 5
Supplementary Table 5. The protein-protein interaction (PPI) network analysis of the corresponding DMGs through searching STRING database.
node1	node2	node1_string_internal_id	node2_string_internal_id	node1_external_id	node2_external_id	neighborhood_on_chromosome	gene_fusion	phylogenetic_cooccurrence	homology	coexpression	experimentally_determined_interaction	database_annotated	automated_textmining	combined_score
TNFRSF10C	TNFSF10	4441913	4433796	9606.ENSP00000349324	9606.ENSP00000241261	0	0	0	0	0	0.993	0.9	0.768	0.999
CYFIP1	WASF1	4451554	4446045	9606.ENSP00000481038	9606.ENSP00000376368	0	0	0	0	0.083	0.992	0.9	0.757	0.999
FANCA	HES1	4445843	4433557	9606.ENSP00000373952	9606.ENSP00000232424	0	0	0	0	0	0.993	0.9	0.353	0.999
CXCR2	CXCL8	4439296	4438229	9606.ENSP00000319635	9606.ENSP00000306512	0	0	0	0	0.064	0.667	0.9	0.937	0.997
IFT140	IFT81	4448388	4433825	9606.ENSP00000406012	9606.ENSP00000242591	0	0	0	0	0.262	0.733	0.9	0.842	0.996
PCGF2	PHC2	4451633	4434529	9606.ENSP00000482063	9606.ENSP00000257118	0	0	0	0	0.061	0.759	0.9	0.847	0.996
HDAC2	SMARCA5	4449546	4436522	9606.ENSP00000430432	9606.ENSP00000283131	0	0	0	0	0.359	0.858	0.9	0.527	0.995
CXCL1	CXCR2	4446449	4439296	9606.ENSP00000379110	9606.ENSP00000319635	0	0	0	0	0	0.379	0.9	0.936	0.995
HBA1	HBA2	4439524	4434183	9606.ENSP00000322421	9606.ENSP00000251595	0	0	0	0.985	0.771	0.8	0.9	0.538	0.995
IFT140	IFT80	4448388	4438823	9606.ENSP00000406012	9606.ENSP00000312778	0	0	0	0	0.52	0	0.9	0.895	0.994
SERPINC1	ITIH2	4442941	4442116	9606.ENSP00000356671	9606.ENSP00000351190	0	0	0	0	0.922	0	0.9	0.319	0.994
IFT80	IFT81	4438823	4433825	9606.ENSP00000312778	9606.ENSP00000242591	0	0	0	0	0.456	0.142	0.9	0.843	0.991
CECR2	SMARCA5	4441131	4436522	9606.ENSP00000341219	9606.ENSP00000283131	0	0	0	0	0.086	0.709	0.9	0.734	0.991
PCGF2	CBX2	4451633	4438444	9606.ENSP00000482063	9606.ENSP00000308750	0	0	0	0	0.087	0.722	0.9	0.713	0.991
LEPR	SOCS3	4440182	4440175	9606.ENSP00000330393	9606.ENSP00000330341	0	0	0	0	0	0.465	0.9	0.838	0.99
COL6A2	COL6A3	4437672	4437161	9606.ENSP00000300527	9606.ENSP00000295550	0	0	0	0.657	0.851	0	0.9	0.936	0.989
ADM	RAMP3	4449788	4433813	9606.ENSP00000436607	9606.ENSP00000242249	0	0	0	0	0	0	0.9	0.893	0.988
CD163	HP	4442211	4441808	9606.ENSP00000352071	9606.ENSP00000348170	0	0	0	0	0.061	0.379	0.9	0.824	0.988
TNFAIP3	TNF	4451592	4448041	9606.ENSP00000481570	9606.ENSP00000398698	0	0	0	0	0.229	0.369	0.9	0.777	0.987
CXCL2	CXCR2	4449392	4439296	9606.ENSP00000427279	9606.ENSP00000319635	0	0	0	0	0	0.379	0.9	0.815	0.987
CXCL1	CXCL8	4446449	4438229	9606.ENSP00000379110	9606.ENSP00000306512	0	0	0	0.878	0.842	0	0.9	0.918	0.985
TOP2A	MKI67	4448614	4443142	9606.ENSP00000411532	9606.ENSP00000357643	0	0	0	0	0.966	0	0	0.564	0.984
TOP2A	KIF20A	4448614	4446341	9606.ENSP00000411532	9606.ENSP00000378356	0	0	0	0	0.972	0	0	0.454	0.984
AKR1C1	DHDH	4445467	4433152	9606.ENSP00000370254	9606.ENSP00000221403	0.06	0	0	0	0.111	0	0.8	0.917	0.984
ADM	ADM2	4449788	4446444	9606.ENSP00000436607	9606.ENSP00000379087	0	0	0	0	0	0	0.9	0.839	0.983
CXCL2	CXCL8	4449392	4438229	9606.ENSP00000427279	9606.ENSP00000306512	0	0	0	0.874	0.824	0	0.9	0.767	0.983
FAM20A	ENAM	4450874	4446500	9606.ENSP00000468308	9606.ENSP00000379383	0	0	0	0	0	0.354	0.9	0.765	0.983
CXCR4	CXCL8	4447439	4438229	9606.ENSP00000386884	9606.ENSP00000306512	0	0	0	0	0	0	0.9	0.812	0.98
CXCL2	CXCL1	4449392	4446449	9606.ENSP00000427279	9606.ENSP00000379110	0	0	0	0.979	0.809	0	0.9	0.934	0.98
COL4A2	MSR1	4442382	4435004	9606.ENSP00000353654	9606.ENSP00000262101	0	0	0	0.576	0	0.808	0.9	0.041	0.979
CBX2	PHC2	4438444	4434529	9606.ENSP00000308750	9606.ENSP00000257118	0	0	0	0	0.062	0.352	0.9	0.673	0.977
ADM2	RAMP3	4446444	4433813	9606.ENSP00000379087	9606.ENSP00000242249	0	0	0	0	0	0	0.9	0.788	0.977
HP	HBA1	4441808	4439524	9606.ENSP00000348170	9606.ENSP00000322421	0	0	0	0	0.074	0.846	0.72	0.491	0.977
FCGR1B	FCGR1A	4443305	4443273	9606.ENSP00000358391	9606.ENSP00000358165	0	0	0	0.984	0.771	0	0.9	0.712	0.976
HP	HBA2	4441808	4434183	9606.ENSP00000348170	9606.ENSP00000251595	0	0	0	0	0.056	0.846	0.72	0.49	0.976
MUC5B	MUC16	4449799	4446747	9606.ENSP00000436812	9606.ENSP00000381008	0	0	0	0	0.155	0	0.9	0.746	0.976
MUC6	MUC16	4448430	4446747	9606.ENSP00000406861	9606.ENSP00000381008	0	0	0	0	0	0	0.9	0.758	0.974
ZFYVE9	SMAD7	4436740	4435020	9606.ENSP00000287727	9606.ENSP00000262158	0	0	0	0	0	0.43	0.9	0.59	0.974
TNF	CXCL8	4448041	4438229	9606.ENSP00000398698	9606.ENSP00000306512	0	0	0	0	0.156	0	0	0.97	0.973
VANGL1	PRICKLE1	4441743	4441486	9606.ENSP00000347672	9606.ENSP00000345064	0	0	0	0	0.045	0.385	0.8	0.784	0.971
C1S	C1QC	4447198	4444427	9606.ENSP00000385035	9606.ENSP00000363770	0	0	0	0	0.185	0	0.9	0.663	0.97
FZD2	WNT6	4439648	4433609	9606.ENSP00000323901	9606.ENSP00000233948	0	0	0	0	0	0.262	0.9	0.615	0.969
PPARA	ANGPTL4	4447242	4437761	9606.ENSP00000385523	9606.ENSP00000301455	0	0	0	0	0.061	0.05	0.9	0.693	0.969
CXCL8	CCR2	4438229	4436955	9606.ENSP00000306512	9606.ENSP00000292301	0	0	0	0	0.078	0	0.9	0.675	0.967
CXCL1	CCR2	4446449	4436955	9606.ENSP00000379110	9606.ENSP00000292301	0	0	0	0	0	0	0.9	0.675	0.966
TCTN3	NPHP1	4451765	4438844	9606.ENSP00000483364	9606.ENSP00000313169	0	0	0	0	0	0	0.9	0.675	0.966
FZD5	WNT6	4442500	4433609	9606.ENSP00000354607	9606.ENSP00000233948	0	0	0	0	0	0.262	0.9	0.587	0.966
TCTN3	CEP41	4451765	4433273	9606.ENSP00000483364	9606.ENSP00000223208	0	0	0	0	0	0	0.9	0.669	0.965
CXCR4	CXCL1	4447439	4446449	9606.ENSP00000386884	9606.ENSP00000379110	0	0	0	0	0	0	0.9	0.657	0.964
SPINT1	HGF	4441220	4433227	9606.ENSP00000342098	9606.ENSP00000222390	0	0	0	0	0	0.132	0.9	0.625	0.964
CXCL2	CCR2	4449392	4436955	9606.ENSP00000427279	9606.ENSP00000292301	0	0	0	0	0	0	0.9	0.657	0.964
PRICKLE3	VANGL1	4450950	4441743	9606.ENSP00000470248	9606.ENSP00000347672	0	0	0	0	0.045	0.436	0.8	0.69	0.962
TLR7	IRAK2	4445433	4434487	9606.ENSP00000370034	9606.ENSP00000256458	0	0	0	0	0.061	0.177	0.9	0.577	0.962
ITGA7	LAMA5	4450383	4434270	9606.ENSP00000452120	9606.ENSP00000252999	0	0	0	0	0.088	0.369	0.9	0.396	0.96
TLR8	IRAK2	4438750	4434487	9606.ENSP00000312082	9606.ENSP00000256458	0	0	0	0	0	0.177	0.9	0.558	0.96
HP	LRG1	4441808	4437875	9606.ENSP00000348170	9606.ENSP00000302621	0	0	0	0	0.109	0.099	0.9	0.553	0.959
TNF	CSF2	4448041	4437349	9606.ENSP00000398698	9606.ENSP00000296871	0	0	0	0	0.131	0	0	0.951	0.956
GAS6	HGF	4440301	4433227	9606.ENSP00000331831	9606.ENSP00000222390	0	0	0	0	0.065	0	0.9	0.575	0.956
CXCL2	CXCR4	4449392	4447439	9606.ENSP00000427279	9606.ENSP00000386884	0	0	0	0	0	0	0.9	0.58	0.956
TLR7	TLR8	4445433	4438750	9606.ENSP00000370034	9606.ENSP00000312082	0	0	0	0.904	0.29	0.379	0.9	0.935	0.956
PPARA	ARNTL	4447242	4447127	9606.ENSP00000385523	9606.ENSP00000384517	0	0	0	0	0	0.268	0.9	0.446	0.955
NPHP1	CEP41	4438844	4433273	9606.ENSP00000313169	9606.ENSP00000223208	0	0	0	0	0.057	0	0.9	0.567	0.955
SCN8A	SPTBN4	4441631	4435249	9606.ENSP00000346534	9606.ENSP00000263373	0	0	0	0	0.159	0	0.9	0.497	0.954
DFNB31	MYO15A	4442506	4432816	9606.ENSP00000354623	9606.ENSP00000205890	0	0	0	0	0	0.472	0	0.916	0.954
TNF	PPARA	4448041	4447242	9606.ENSP00000398698	9606.ENSP00000385523	0	0	0	0	0	0	0.9	0.538	0.951
ROR1	FZD2	4443662	4439648	9606.ENSP00000360120	9606.ENSP00000323901	0	0	0	0	0.082	0.19	0.9	0.408	0.95
IGF2	HGF	4447717	4433227	9606.ENSP00000391826	9606.ENSP00000222390	0	0	0	0	0	0	0.9	0.521	0.95
HEY1	HES1	4440859	4433557	9606.ENSP00000338272	9606.ENSP00000232424	0	0	0	0.681	0.088	0.379	0.9	0.648	0.95
HSPG2	HS3ST1	4444439	4432550	9606.ENSP00000363827	9606.ENSP00000002596	0	0	0	0	0.051	0	0.9	0.497	0.948
KIF20A	PTTG1	4446341	4446209	9606.ENSP00000378356	9606.ENSP00000377536	0	0	0	0	0.917	0	0	0.404	0.948
ROR1	FZD5	4443662	4442500	9606.ENSP00000360120	9606.ENSP00000354607	0	0	0	0	0.064	0.19	0.9	0.394	0.947
HDAC2	GLI1	4449546	4433423	9606.ENSP00000430432	9606.ENSP00000228682	0	0	0	0	0	0.422	0.9	0.14	0.945
ANK1	SPTBN4	4435633	4435249	9606.ENSP00000265709	9606.ENSP00000263373	0	0	0	0	0.095	0.133	0.9	0.385	0.945
HDAC2	EGR1	4449546	4433758	9606.ENSP00000430432	9606.ENSP00000239938	0	0	0	0	0	0.157	0.9	0.402	0.945
GIPR	HTR4	4450851	4442414	9606.ENSP00000467494	9606.ENSP00000353915	0	0	0	0	0	0	0.9	0.469	0.944
COL4A2	COL6A2	4442382	4437672	9606.ENSP00000353654	9606.ENSP00000300527	0	0	0	0.575	0.312	0	0.9	0.543	0.944
HSPG2	LAMA5	4444439	4434270	9606.ENSP00000363827	9606.ENSP00000252999	0	0	0	0.546	0.174	0.136	0.9	0.613	0.943
ANK1	CHL1	4435633	4434493	9606.ENSP00000265709	9606.ENSP00000256509	0	0	0	0	0.062	0.379	0.9	0.127	0.942
XRCC3	BRIP1	4450379	4434671	9606.ENSP00000451974	9606.ENSP00000259008	0.052	0	0	0	0.062	0.051	0.9	0.419	0.942
HP	RETN	4441808	4433169	9606.ENSP00000348170	9606.ENSP00000221515	0	0	0	0	0.089	0	0.9	0.415	0.942
HEY1	GATA6	4440859	4435874	9606.ENSP00000338272	9606.ENSP00000269216	0	0	0	0	0	0.156	0.9	0.373	0.942
RSPH9	RSPH6A	4443891	4433170	9606.ENSP00000361238	9606.ENSP00000221538	0	0	0	0	0.44	0	0	0.9	0.941
LLGL2	PARD6G	4446039	4441311	9606.ENSP00000376333	9606.ENSP00000343144	0	0	0	0	0.061	0.865	0	0.57	0.941
CYFIP1	HP	4451554	4441808	9606.ENSP00000481038	9606.ENSP00000348170	0	0	0	0	0	0	0.9	0.437	0.941
CNR1	PNOC	4443334	4437808	9606.ENSP00000358513	9606.ENSP00000301908	0	0	0	0	0.083	0	0.9	0.4	0.94
SMAD6	SMAD7	4436786	4435020	9606.ENSP00000288840	9606.ENSP00000262158	0	0	0	0.92	0.089	0.348	0.9	0.883	0.939
YES1	DOK1	4450671	4433599	9606.ENSP00000462468	9606.ENSP00000233668	0	0	0	0	0	0.235	0.9	0.264	0.938
CXCL1	CCR8	4446449	4439852	9606.ENSP00000379110	9606.ENSP00000326432	0	0	0	0	0	0	0.9	0.405	0.938
CACNA2D2	CACNG6	4448948	4434250	9606.ENSP00000418081	9606.ENSP00000252729	0	0	0	0	0	0	0.9	0.411	0.938
CCR8	CXCL8	4439852	4438229	9606.ENSP00000326432	9606.ENSP00000306512	0	0	0	0	0	0	0.9	0.404	0.937
ENTPD2	AK8	4441701	4437499	9606.ENSP00000347213	9606.ENSP00000298545	0	0	0	0	0.062	0	0.9	0.389	0.937
FTCD	ALDH1L2	4436927	4434639	9606.ENSP00000291670	9606.ENSP00000258494	0	0	0	0	0.064	0	0.9	0.38	0.936
COL4A2	COL6A3	4442382	4437161	9606.ENSP00000353654	9606.ENSP00000295550	0	0	0	0.547	0.197	0	0.9	0.542	0.936
GPR161	IFT140	4449974	4448388	9606.ENSP00000441039	9606.ENSP00000406012	0	0	0	0	0	0	0.9	0.39	0.936
GIPR	ADRB1	4450851	4443292	9606.ENSP00000467494	9606.ENSP00000358301	0	0	0	0	0	0	0.9	0.389	0.936
SOCS3	IL23R	4440175	4439435	9606.ENSP00000330341	9606.ENSP00000321345	0	0	0	0	0	0	0.9	0.369	0.934
LPAR1	CXCL8	4444391	4438229	9606.ENSP00000363553	9606.ENSP00000306512	0	0	0	0	0	0	0.9	0.373	0.934
POLR2F	SMARCA5	4448289	4436522	9606.ENSP00000403852	9606.ENSP00000283131	0	0	0	0	0	0.318	0.9	0.104	0.933
HDAC2	CBX2	4449546	4438444	9606.ENSP00000430432	9606.ENSP00000308750	0	0	0	0	0.091	0.123	0.9	0.268	0.933
TRIM4	TRIM9	4441812	4437487	9606.ENSP00000348216	9606.ENSP00000298355	0	0	0	0	0	0	0.9	0.351	0.932
NLRC4	CASP5	4447203	4446112	9606.ENSP00000385090	9606.ENSP00000376849	0	0	0	0	0.169	0.128	0.72	0.7	0.931
SSTR3	PNOC	4451544	4437808	9606.ENSP00000480971	9606.ENSP00000301908	0	0	0	0	0.14	0	0.9	0.268	0.931
RETN	PGLYRP1	4433169	4432580	9606.ENSP00000221515	9606.ENSP00000008938	0	0	0	0	0.211	0	0.9	0.201	0.931
NTN4	LAMA5	4441104	4434270	9606.ENSP00000340998	9606.ENSP00000252999	0	0	0	0.709	0.198	0.195	0.9	0.125	0.931
CXCL1	RETN	4446449	4433169	9606.ENSP00000379110	9606.ENSP00000221515	0	0	0	0	0.069	0	0.9	0.316	0.93
CCNE1	CCND1	4435118	4433391	9606.ENSP00000262643	9606.ENSP00000227507	0	0	0	0.67	0.063	0.057	0.9	0.844	0.93
SCN8A	ANK1	4441631	4435633	9606.ENSP00000346534	9606.ENSP00000265709	0	0	0	0	0.083	0.085	0.9	0.27	0.93
KIF20A	MKI67	4446341	4443142	9606.ENSP00000378356	9606.ENSP00000357643	0	0	0	0	0.91	0	0	0.249	0.929
CXCR4	CNR1	4447439	4443334	9606.ENSP00000386884	9606.ENSP00000358513	0	0	0	0	0	0	0.9	0.325	0.929
PACSIN1	ITSN1	4451827	4445530	9606.ENSP00000484060	9606.ENSP00000370719	0	0	0	0	0	0	0.9	0.326	0.929
NRG1	LLGL2	4447144	4446039	9606.ENSP00000384620	9606.ENSP00000376333	0	0	0	0	0	0.929	0	0.042	0.929
GALNTL6	MUC6	4449243	4448430	9606.ENSP00000423313	9606.ENSP00000406861	0	0	0	0	0	0	0.9	0.31	0.928
MUC5B	MUC6	4449799	4448430	9606.ENSP00000436812	9606.ENSP00000406861	0	0	0	0.735	0.111	0	0.9	0.873	0.928
CXCL2	CCR8	4449392	4439852	9606.ENSP00000427279	9606.ENSP00000326432	0	0	0	0	0	0	0.9	0.317	0.928
CXCR4	S1PR5	4447439	4440026	9606.ENSP00000386884	9606.ENSP00000328472	0	0	0	0	0	0	0.9	0.31	0.928
FUT2	GCNT2	4447509	4445238	9606.ENSP00000387498	9606.ENSP00000368917	0	0	0	0	0.049	0	0.9	0.302	0.927
GLI1	CCND1	4433423	4433391	9606.ENSP00000228682	9606.ENSP00000227507	0	0	0	0	0	0.05	0.8	0.649	0.927
E2F8	TOP2A	4451562	4448614	9606.ENSP00000481103	9606.ENSP00000411532	0	0	0	0	0.91	0	0	0.231	0.927
CISH	SOCS3	4448513	4440175	9606.ENSP00000409346	9606.ENSP00000330341	0	0	0	0.754	0.098	0	0.9	0.897	0.926
CNR1	CXCL8	4443334	4438229	9606.ENSP00000358513	9606.ENSP00000306512	0	0	0	0	0	0	0.9	0.294	0.926
SPTBN5	SPTBN4	4439152	4435249	9606.ENSP00000317790	9606.ENSP00000263373	0	0	0	0.679	0.088	0	0.9	0.714	0.926
GALNT6	MUC6	4450107	4448430	9606.ENSP00000444171	9606.ENSP00000406861	0	0	0	0	0	0	0.9	0.284	0.925
TOP2A	PTTG1	4448614	4446209	9606.ENSP00000411532	9606.ENSP00000377536	0	0	0	0	0.854	0	0	0.507	0.925
RAB19	RAB40C	4449932	4449871	9606.ENSP00000440167	9606.ENSP00000438492	0	0	0.207	0.816	0.11	0.192	0.9	0.128	0.925
CXCR4	LPAR1	4447439	4444391	9606.ENSP00000386884	9606.ENSP00000363553	0	0	0	0	0	0.126	0.9	0.212	0.925
SPTBN5	ANK1	4439152	4435633	9606.ENSP00000317790	9606.ENSP00000265709	0	0	0	0	0.063	0.186	0.9	0.136	0.925
DYNLL1	IFT80	4446030	4438823	9606.ENSP00000376297	9606.ENSP00000312778	0	0	0	0	0.062	0	0.9	0.264	0.924
MUC5B	GALNTL6	4449799	4449243	9606.ENSP00000436812	9606.ENSP00000423313	0	0	0	0	0	0	0.9	0.274	0.924
TRPM2	ITGB2	4446749	4446737	9606.ENSP00000381023	9606.ENSP00000380948	0	0	0	0	0.28	0	0.9	0	0.924
COL11A2	COL4A2	4444442	4442382	9606.ENSP00000363840	9606.ENSP00000353654	0	0	0.396	0.657	0.061	0	0.9	0.319	0.923
HP	PGLYRP1	4441808	4432580	9606.ENSP00000348170	9606.ENSP00000008938	0	0	0	0	0.088	0	0.9	0.229	0.923
TSHR	HTR7	4449981	4440833	9606.ENSP00000441235	9606.ENSP00000337949	0	0	0	0	0.044	0	0.9	0.264	0.923
FZD2	KREMEN2	4439648	4438052	9606.ENSP00000323901	9606.ENSP00000304422	0	0	0	0	0.077	0	0.9	0.23	0.922
AK8	ATP5B	4437499	4434993	9606.ENSP00000298545	9606.ENSP00000262030	0	0	0	0	0.11	0	0.9	0.203	0.922
WNT5B	FZD2	4446654	4439648	9606.ENSP00000380379	9606.ENSP00000323901	0	0	0	0	0.099	0.336	0.6	0.714	0.922
COL4A4	COL11A2	4446575	4444442	9606.ENSP00000379866	9606.ENSP00000363840	0	0	0.394	0.678	0.061	0	0.9	0.36	0.922
CXCL1	HP	4446449	4441808	9606.ENSP00000379110	9606.ENSP00000348170	0	0	0	0	0.052	0	0.9	0.249	0.922
GCNT1	MUC6	4448787	4448430	9606.ENSP00000415454	9606.ENSP00000406861	0	0	0	0	0	0	0.9	0.242	0.921
ADAMTS13	ADAMTS5	4443840	4436610	9606.ENSP00000360997	9606.ENSP00000284987	0	0	0	0.66	0	0	0.9	0.651	0.921
ADRB1	HTR7	4443292	4440833	9606.ENSP00000358301	9606.ENSP00000337949	0	0	0	0.752	0.063	0	0.9	0.796	0.921
CXCR4	CCR2	4447439	4436955	9606.ENSP00000386884	9606.ENSP00000292301	0	0	0	0.832	0.127	0	0.9	0.802	0.921
KISS1R	GNA11	4433626	4432654	9606.ENSP00000234371	9606.ENSP00000078429	0	0	0	0	0	0.177	0.9	0.117	0.921
CNR1	CCR2	4443334	4436955	9606.ENSP00000358513	9606.ENSP00000292301	0	0	0	0	0	0	0.9	0.244	0.921
F2RL1	GNA11	4437321	4432654	9606.ENSP00000296677	9606.ENSP00000078429	0	0	0	0	0	0	0.9	0.233	0.92
GALNT6	MUC5B	4450107	4449799	9606.ENSP00000444171	9606.ENSP00000436812	0	0	0	0	0	0	0.9	0.233	0.92
CXCR4	PNOC	4447439	4437808	9606.ENSP00000386884	9606.ENSP00000301908	0	0	0	0	0.076	0	0.9	0.21	0.92
CXCR2	CCR2	4439296	4436955	9606.ENSP00000319635	9606.ENSP00000292301	0	0	0	0.833	0.117	0	0.9	0.768	0.919
GIPR	TSHR	4450851	4449981	9606.ENSP00000467494	9606.ENSP00000441235	0	0	0	0	0.061	0	0.9	0.213	0.919
UBE3C	HECW2	4438485	4434814	9606.ENSP00000309198	9606.ENSP00000260983	0	0	0	0.581	0.14	0	0.9	0.241	0.918
SSTR3	CNR1	4451544	4443334	9606.ENSP00000480971	9606.ENSP00000358513	0	0	0	0.561	0.092	0	0.9	0.341	0.918
GALNT6	MUC16	4450107	4446747	9606.ENSP00000444171	9606.ENSP00000381008	0	0	0	0	0	0	0.9	0.214	0.918
KIF20A	KIF19	4446341	4445896	9606.ENSP00000378356	9606.ENSP00000374566	0	0	0	0.57	0.144	0	0.9	0.203	0.917
ITGB2	CEACAM3	4446737	4441996	9606.ENSP00000380948	9606.ENSP00000349971	0	0	0	0	0.177	0	0.9	0.073	0.917
IFT140	DYNLL1	4448388	4446030	9606.ENSP00000406012	9606.ENSP00000376297	0	0	0	0	0.062	0	0.9	0.193	0.917
ADM	ADRB1	4449788	4443292	9606.ENSP00000436607	9606.ENSP00000358301	0	0	0	0	0	0	0.9	0.211	0.917
COL4A4	COL6A3	4446575	4437161	9606.ENSP00000379866	9606.ENSP00000295550	0	0	0	0.556	0.061	0	0.9	0.373	0.917
LPAR1	F2RL1	4444391	4437321	9606.ENSP00000363553	9606.ENSP00000296677	0	0	0	0	0	0	0.9	0.211	0.917
LPAR1	GNA11	4444391	4432654	9606.ENSP00000363553	9606.ENSP00000078429	0	0	0	0	0.062	0.177	0.9	0.054	0.917
GPAT2	GPD2	4447605	4438431	9606.ENSP00000389395	9606.ENSP00000308610	0.043	0	0	0	0	0	0.9	0.202	0.916
COL4A4	COL6A2	4446575	4437672	9606.ENSP00000379866	9606.ENSP00000300527	0	0	0	0.595	0.064	0	0.9	0.372	0.916
SEMA5A	PLXNB1	4445698	4442133	9606.ENSP00000371936	9606.ENSP00000351338	0	0	0	0	0	0.188	0	0.901	0.916
HTR4	HTR7	4442414	4440833	9606.ENSP00000353915	9606.ENSP00000337949	0	0	0	0.776	0.061	0	0.9	0.678	0.916
SCN3A	ANK1	4436534	4435633	9606.ENSP00000283254	9606.ENSP00000265709	0	0	0	0	0.082	0.085	0.9	0.125	0.916
S1PR5	CXCL8	4440026	4438229	9606.ENSP00000328472	9606.ENSP00000306512	0	0	0	0	0	0	0.9	0.193	0.915
S1PR5	CCR2	4440026	4436955	9606.ENSP00000328472	9606.ENSP00000292301	0	0	0	0	0	0	0.9	0.186	0.915
GPER1	CXCL8	4446636	4438229	9606.ENSP00000380281	9606.ENSP00000306512	0	0	0	0	0	0	0.9	0.187	0.915
EPHA2	EPHB3	4442119	4440327	9606.ENSP00000351209	9606.ENSP00000332118	0	0	0	0.93	0.065	0.131	0.9	0.657	0.915
COL4A4	COL4A2	4446575	4442382	9606.ENSP00000379866	9606.ENSP00000353654	0	0	0.403	0.878	0.061	0	0.9	0.743	0.914
LPAR1	FFAR1	4444391	4433988	9606.ENSP00000363553	9606.ENSP00000246553	0	0	0	0	0	0	0.9	0.179	0.914
HCRTR1	GNA11	4447115	4432654	9606.ENSP00000384387	9606.ENSP00000078429	0	0	0	0	0	0.177	0.9	0.05	0.914
COL11A2	COL6A2	4444442	4437672	9606.ENSP00000363840	9606.ENSP00000300527	0	0	0	0.6	0.108	0	0.9	0.225	0.914
CXCR4	CXCR2	4447439	4439296	9606.ENSP00000386884	9606.ENSP00000319635	0	0	0	0.844	0.061	0	0.9	0.839	0.914
YES1	EPHA2	4450671	4442119	9606.ENSP00000462468	9606.ENSP00000351209	0	0	0	0.75	0.114	0	0.9	0.323	0.914
ITGB2	MST1R	4446737	4437287	9606.ENSP00000380948	9606.ENSP00000296474	0	0	0	0	0.056	0.157	0.9	0	0.913
IGF2	GAS6	4447717	4440301	9606.ENSP00000391826	9606.ENSP00000331831	0	0	0	0	0.069	0	0.9	0.146	0.913
CXCR4	CCR8	4447439	4439852	9606.ENSP00000386884	9606.ENSP00000326432	0	0	0	0.832	0.064	0	0.9	0.669	0.913
PCGF2	HDAC2	4451633	4449546	9606.ENSP00000482063	9606.ENSP00000430432	0	0	0	0	0	0	0.9	0.171	0.913
CXCL1	PGLYRP1	4446449	4432580	9606.ENSP00000379110	9606.ENSP00000008938	0	0	0	0	0	0	0.9	0.174	0.913
YES1	FZD2	4450671	4439648	9606.ENSP00000462468	9606.ENSP00000323901	0	0	0	0	0.061	0.106	0.9	0.096	0.913
HCRTR1	EDN2	4447115	4443976	9606.ENSP00000384387	9606.ENSP00000361668	0	0	0	0	0	0.157	0.9	0	0.912
DUSP8	DUSP2	4446679	4436790	9606.ENSP00000380530	9606.ENSP00000288943	0	0	0	0.8	0	0	0.9	0.646	0.912
LPAR1	EDN2	4444391	4443976	9606.ENSP00000363553	9606.ENSP00000361668	0	0	0	0	0	0.157	0.9	0	0.912
EDN2	KISS1R	4443976	4433626	9606.ENSP00000361668	9606.ENSP00000234371	0	0	0	0	0	0.157	0.9	0	0.912
GPER1	CNR1	4446636	4443334	9606.ENSP00000380281	9606.ENSP00000358513	0	0	0	0	0	0	0.9	0.16	0.912
HDAC2	PHC2	4449546	4434529	9606.ENSP00000430432	9606.ENSP00000257118	0	0	0	0	0	0.117	0.9	0.093	0.912
ADAMTS5	THSD1	4436610	4434644	9606.ENSP00000284987	9606.ENSP00000258613	0	0	0	0	0	0	0.9	0.153	0.911
TSHR	ADRB1	4449981	4443292	9606.ENSP00000441235	9606.ENSP00000358301	0	0	0	0	0.044	0	0.9	0.15	0.911
PIK3R6	CXCR4	4451458	4447439	9606.ENSP00000480157	9606.ENSP00000386884	0	0	0	0	0.121	0	0.9	0.073	0.911
CCR8	CCR2	4439852	4436955	9606.ENSP00000326432	9606.ENSP00000292301	0	0	0	0.904	0.088	0	0.9	0.721	0.911
GCNT1	MUC16	4448787	4446747	9606.ENSP00000415454	9606.ENSP00000381008	0	0	0	0	0	0	0.9	0.151	0.911
GPER1	LPAR1	4446636	4444391	9606.ENSP00000380281	9606.ENSP00000363553	0	0	0	0	0	0	0.9	0.153	0.911
LPAR1	S1PR5	4444391	4440026	9606.ENSP00000363553	9606.ENSP00000328472	0	0	0	0.826	0.061	0	0.9	0.586	0.911
STX1A	STX1B	4433256	4432855	9606.ENSP00000222812	9606.ENSP00000215095	0	0	0	0.981	0.134	0	0.9	0.811	0.911
GIPR	RAMP3	4450851	4433813	9606.ENSP00000467494	9606.ENSP00000242249	0	0	0	0	0	0	0.9	0.15	0.911
GPER1	PNOC	4446636	4437808	9606.ENSP00000380281	9606.ENSP00000301908	0	0	0	0	0	0	0.9	0.146	0.91
LPAR1	KISS1R	4444391	4433626	9606.ENSP00000363553	9606.ENSP00000234371	0	0	0	0	0	0	0.9	0.139	0.91
KIF20A	ASF1B	4446341	4435253	9606.ENSP00000378356	9606.ENSP00000263382	0	0	0	0	0.886	0	0	0.236	0.91
ADM	HTR7	4449788	4440833	9606.ENSP00000436607	9606.ENSP00000337949	0	0	0	0	0.064	0	0.9	0.116	0.91
LGR4	LGR6	4445176	4442850	9606.ENSP00000368516	9606.ENSP00000356247	0	0	0	0.919	0	0.086	0.9	0.806	0.91
AKR1C1	CYP2A6	4445467	4437722	9606.ENSP00000370254	9606.ENSP00000301141	0	0	0	0	0.063	0	0.9	0.124	0.91
GALNTL6	MUC16	4449243	4446747	9606.ENSP00000423313	9606.ENSP00000381008	0	0	0	0	0	0	0.9	0.145	0.91
COL11A2	COL6A3	4444442	4437161	9606.ENSP00000363840	9606.ENSP00000295550	0	0	0	0.561	0.064	0	0.9	0.22	0.91
KIF20A	KIF9	4446341	4440503	9606.ENSP00000378356	9606.ENSP00000333942	0	0	0	0.561	0	0	0.9	0.268	0.91
SCN3A	SPTBN4	4436534	4435249	9606.ENSP00000283254	9606.ENSP00000263373	0	0	0	0	0.109	0	0.9	0.07	0.909
DYNLL1	SPTBN4	4446030	4435249	9606.ENSP00000376297	9606.ENSP00000263373	0	0	0	0	0	0.133	0.9	0	0.909
CCR8	CXCR2	4439852	4439296	9606.ENSP00000326432	9606.ENSP00000319635	0	0	0	0.843	0	0	0.9	0.591	0.909
CXCL1	LPAR1	4446449	4444391	9606.ENSP00000379110	9606.ENSP00000363553	0	0	0	0	0.064	0	0.9	0.108	0.909
ADRB1	HTR4	4443292	4442414	9606.ENSP00000358301	9606.ENSP00000353915	0	0	0	0.786	0	0	0.9	0.47	0.909
DYNLL1	IFT81	4446030	4433825	9606.ENSP00000376297	9606.ENSP00000242591	0	0	0	0	0.087	0	0.9	0.086	0.909
DYNLL1	SPTBN5	4446030	4439152	9606.ENSP00000376297	9606.ENSP00000317790	0	0	0	0	0	0.133	0.9	0	0.909
KIF20A	DYNLL1	4446341	4446030	9606.ENSP00000378356	9606.ENSP00000376297	0	0	0	0	0	0.056	0.9	0.103	0.908
CXCL1	CNR1	4446449	4443334	9606.ENSP00000379110	9606.ENSP00000358513	0	0	0	0	0	0	0.9	0.122	0.908
FAM20A	GAS6	4450874	4440301	9606.ENSP00000468308	9606.ENSP00000331831	0	0	0	0	0.062	0	0.9	0.098	0.908
HRH2	HTR7	4444864	4440833	9606.ENSP00000366506	9606.ENSP00000337949	0	0	0	0.777	0	0	0.9	0.399	0.908
LRG1	RETN	4437875	4433169	9606.ENSP00000302621	9606.ENSP00000221515	0	0	0	0	0.076	0	0.9	0.09	0.908
HRH2	HTR4	4444864	4442414	9606.ENSP00000366506	9606.ENSP00000353915	0	0	0	0.809	0	0	0.9	0.399	0.907
TSHR	HTR4	4449981	4442414	9606.ENSP00000441235	9606.ENSP00000353915	0	0	0	0.568	0.044	0	0.9	0.194	0.907
KIF19	KIF9	4445896	4440503	9606.ENSP00000374566	9606.ENSP00000333942	0	0	0	0.61	0	0	0.9	0.219	0.907
HRH2	ADRB1	4444864	4443292	9606.ENSP00000366506	9606.ENSP00000358301	0	0	0	0.808	0	0	0.9	0.397	0.907
IGF2	CCND1	4447717	4433391	9606.ENSP00000391826	9606.ENSP00000227507	0	0	0	0	0.092	0	0	0.901	0.907
CNR1	S1PR5	4443334	4440026	9606.ENSP00000358513	9606.ENSP00000328472	0	0	0	0.683	0.061	0	0.9	0.213	0.907
WNT5B	WNT6	4446654	4433609	9606.ENSP00000380379	9606.ENSP00000233948	0	0	0	0.889	0	0	0.9	0.707	0.907
CNR1	CXCR2	4443334	4439296	9606.ENSP00000358513	9606.ENSP00000319635	0	0	0	0	0	0	0.9	0.11	0.907
ALPL	COL4A2	4444459	4442382	9606.ENSP00000363973	9606.ENSP00000353654	0	0	0	0	0.065	0	0.9	0.084	0.906
FFAR1	GNA11	4433988	4432654	9606.ENSP00000246553	9606.ENSP00000078429	0	0	0	0	0	0	0.9	0.107	0.906
TECTA	ALPL	4446075	4444459	9606.ENSP00000376543	9606.ENSP00000363973	0	0	0	0	0.102	0	0.9	0.041	0.906
CXCL8	CSF2	4438229	4437349	9606.ENSP00000306512	9606.ENSP00000296871	0	0	0	0	0.148	0	0	0.895	0.906
LPAR1	CNR1	4444391	4443334	9606.ENSP00000363553	9606.ENSP00000358513	0	0	0	0.72	0	0	0.9	0.267	0.906
LPAR1	CCR2	4444391	4436955	9606.ENSP00000363553	9606.ENSP00000292301	0	0	0	0	0	0	0.9	0.099	0.906
MUC5B	GCNT1	4449799	4448787	9606.ENSP00000436812	9606.ENSP00000415454	0	0	0	0	0	0	0.9	0.098	0.905
ARHGAP29	RASIP1	4434787	4433207	9606.ENSP00000260526	9606.ENSP00000222145	0	0	0	0	0.064	0.076	0	0.899	0.905
PNOC	CCR2	4437808	4436955	9606.ENSP00000301908	9606.ENSP00000292301	0	0	0	0	0.098	0	0.9	0.041	0.905
NRTN	DOK1	4437881	4433599	9606.ENSP00000302648	9606.ENSP00000233668	0	0	0	0	0	0	0.9	0.09	0.905
LPAR1	CXCR2	4444391	4439296	9606.ENSP00000363553	9606.ENSP00000319635	0	0	0	0	0	0	0.9	0.094	0.905
TSHR	HRH2	4449981	4444864	9606.ENSP00000441235	9606.ENSP00000366506	0	0	0	0	0.044	0	0.9	0.092	0.905
PHC2	EGR1	4434529	4433758	9606.ENSP00000257118	9606.ENSP00000239938	0	0	0	0	0	0.065	0.9	0.075	0.905
CXCL2	LPAR1	4449392	4444391	9606.ENSP00000427279	9606.ENSP00000363553	0	0	0	0	0	0	0.9	0.083	0.904
GIPR	ADM2	4450851	4446444	9606.ENSP00000467494	9606.ENSP00000379087	0	0	0	0	0	0	0.9	0.088	0.904
SPTBN5	SCN3A	4439152	4436534	9606.ENSP00000317790	9606.ENSP00000283254	0	0	0	0	0.064	0	0.9	0.066	0.904
S1PR5	CCR8	4440026	4439852	9606.ENSP00000328472	9606.ENSP00000326432	0	0	0	0	0	0	0.9	0.083	0.904
GIPR	ADM	4450851	4449788	9606.ENSP00000467494	9606.ENSP00000436607	0	0	0	0	0	0	0.9	0.088	0.904
LAMA5	HGF	4434270	4433227	9606.ENSP00000252999	9606.ENSP00000222390	0	0	0	0	0	0	0.9	0.082	0.904
S1PR5	CXCR2	4440026	4439296	9606.ENSP00000328472	9606.ENSP00000319635	0	0	0	0	0	0	0.9	0.086	0.904
SEMA5A	ADAMTS5	4445698	4436610	9606.ENSP00000371936	9606.ENSP00000284987	0	0	0	0.544	0.088	0	0.9	0	0.904
PLXNA4	MICAL2	4442296	4434464	9606.ENSP00000352882	9606.ENSP00000256194	0	0	0	0	0	0.546	0	0.798	0.904
CLDN4	CLDN9	4448519	4448005	9606.ENSP00000409544	9606.ENSP00000398017	0	0	0	0.968	0.064	0	0.9	0.552	0.904
SCN8A	SPTBN5	4441631	4439152	9606.ENSP00000346534	9606.ENSP00000317790	0	0	0	0	0.064	0	0.9	0.066	0.904
FZD5	FZD2	4442500	4439648	9606.ENSP00000354607	9606.ENSP00000323901	0	0	0	0.935	0	0	0.9	0.754	0.904
CXCR4	GPER1	4447439	4446636	9606.ENSP00000386884	9606.ENSP00000380281	0	0	0	0.673	0	0	0.9	0.165	0.904
SSTR3	CXCR4	4451544	4447439	9606.ENSP00000480971	9606.ENSP00000386884	0	0	0	0.739	0	0	0.9	0.209	0.904
CACNA2D2	STX1A	4448948	4433256	9606.ENSP00000418081	9606.ENSP00000222812	0	0	0	0	0.049	0	0.9	0.071	0.904
HCRTR1	FFAR1	4447115	4433988	9606.ENSP00000384387	9606.ENSP00000246553	0	0	0	0	0	0	0.9	0.086	0.904
TRIM4	UBE3C	4441812	4438485	9606.ENSP00000348216	9606.ENSP00000309198	0	0	0	0	0.061	0.05	0.9	0	0.903
CXCL2	S1PR5	4449392	4440026	9606.ENSP00000427279	9606.ENSP00000328472	0	0	0	0	0	0	0.9	0.07	0.903
UBE3C	TRIM9	4438485	4437487	9606.ENSP00000309198	9606.ENSP00000298355	0	0	0	0	0.061	0	0.9	0.05	0.903
FAM20A	SERPINC1	4450874	4442941	9606.ENSP00000468308	9606.ENSP00000356671	0	0	0	0	0.077	0	0.9	0	0.903
TECTA	RTN4RL1	4446075	4440199	9606.ENSP00000376543	9606.ENSP00000330631	0	0	0	0	0.061	0.055	0.9	0.043	0.903
CYFIP1	SHB	4451554	4444924	9606.ENSP00000481038	9606.ENSP00000366936	0	0	0	0	0.07	0	0.9	0	0.903
GIPR	HTR7	4450851	4440833	9606.ENSP00000467494	9606.ENSP00000337949	0	0	0	0	0	0	0.9	0.078	0.903
TRPM2	CEACAM3	4446749	4441996	9606.ENSP00000381023	9606.ENSP00000349971	0	0	0	0	0.076	0	0.9	0	0.903
PACSIN1	SCARB2	4451827	4435511	9606.ENSP00000484060	9606.ENSP00000264896	0	0	0	0	0	0	0.9	0.074	0.903
HRH2	RAMP3	4444864	4433813	9606.ENSP00000366506	9606.ENSP00000242249	0	0	0	0	0.076	0	0.9	0	0.903
TSHR	ADM2	4449981	4446444	9606.ENSP00000441235	9606.ENSP00000379087	0	0	0	0	0.061	0	0.9	0	0.902
DYNLL1	ANK1	4446030	4435633	9606.ENSP00000376297	9606.ENSP00000265709	0	0	0	0	0.061	0	0.9	0	0.902
ALPL	RTN4RL1	4444459	4440199	9606.ENSP00000363973	9606.ENSP00000330631	0	0	0	0	0	0	0.9	0.067	0.902
HTR4	RAMP3	4442414	4433813	9606.ENSP00000353915	9606.ENSP00000242249	0	0	0	0	0.065	0	0.9	0	0.902
SSTR3	GPER1	4451544	4446636	9606.ENSP00000480971	9606.ENSP00000380281	0	0	0	0.657	0.061	0	0.9	0.051	0.902
TRPM2	DYNLL1	4446749	4446030	9606.ENSP00000381023	9606.ENSP00000376297	0	0	0	0	0	0	0.9	0.064	0.902
LRG1	PGLYRP1	4437875	4432580	9606.ENSP00000302621	9606.ENSP00000008938	0	0	0	0	0.062	0	0.9	0	0.902
TRIM9	HECW2	4437487	4434814	9606.ENSP00000298355	9606.ENSP00000260983	0	0	0	0	0.063	0	0.9	0	0.902
SSTR3	CXCL8	4451544	4438229	9606.ENSP00000480971	9606.ENSP00000306512	0	0	0	0	0	0	0.9	0.069	0.902
SOCS3	TRIM9	4440175	4437487	9606.ENSP00000330341	9606.ENSP00000298355	0	0	0	0	0.061	0	0.9	0	0.902
SSTR3	CCR8	4451544	4439852	9606.ENSP00000480971	9606.ENSP00000326432	0	0	0	0.756	0.065	0	0.9	0.046	0.902
ITIH2	GAS6	4442116	4440301	9606.ENSP00000351190	9606.ENSP00000331831	0	0	0	0	0.061	0	0.9	0	0.902
F2RL1	FFAR1	4437321	4433988	9606.ENSP00000296677	9606.ENSP00000246553	0	0	0	0.601	0	0	0.9	0.093	0.902
ADM	HRH2	4449788	4444864	9606.ENSP00000436607	9606.ENSP00000366506	0	0	0	0	0.061	0	0.9	0	0.902
SSTR3	S1PR5	4451544	4440026	9606.ENSP00000480971	9606.ENSP00000328472	0	0	0	0.581	0.061	0	0.9	0	0.902
COL4A4	ALPL	4446575	4444459	9606.ENSP00000379866	9606.ENSP00000363973	0	0	0	0	0	0	0.9	0.068	0.902
GPER1	CXCL1	4446636	4446449	9606.ENSP00000380281	9606.ENSP00000379110	0	0	0	0	0	0	0.9	0.064	0.902
EDN2	GNA11	4443976	4432654	9606.ENSP00000361668	9606.ENSP00000078429	0	0	0	0	0	0	0.9	0.067	0.902
ADM2	HRH2	4446444	4444864	9606.ENSP00000379087	9606.ENSP00000366506	0	0	0	0	0.061	0	0.9	0	0.902
FAM20A	ITIH2	4450874	4442116	9606.ENSP00000468308	9606.ENSP00000351190	0	0	0	0	0.064	0	0.9	0	0.902
YES1	NRG1	4450671	4447144	9606.ENSP00000462468	9606.ENSP00000384620	0	0	0	0	0	0	0.9	0.063	0.902
HCRTR1	KISS1R	4447115	4433626	9606.ENSP00000384387	9606.ENSP00000234371	0	0	0	0.708	0	0	0.9	0.111	0.902
CXCL1	LRG1	4446449	4437875	9606.ENSP00000379110	9606.ENSP00000302621	0	0	0	0	0.049	0	0.9	0.056	0.902
YES1	FCGR1A	4450671	4443273	9606.ENSP00000462468	9606.ENSP00000358165	0	0	0	0	0	0.056	0.9	0	0.901
CYFIP1	LRG1	4451554	4437875	9606.ENSP00000481038	9606.ENSP00000302621	0	0	0	0	0	0.058	0.9	0	0.901
LPAR1	PNOC	4444391	4437808	9606.ENSP00000363553	9606.ENSP00000301908	0	0	0	0	0	0	0.9	0.06	0.901
CXCL2	GPER1	4449392	4446636	9606.ENSP00000427279	9606.ENSP00000380281	0	0	0	0	0	0	0.9	0.052	0.901
CXCL2	CNR1	4449392	4443334	9606.ENSP00000427279	9606.ENSP00000358513	0	0	0	0	0	0	0.9	0.057	0.901
CBX2	EGR1	4438444	4433758	9606.ENSP00000308750	9606.ENSP00000239938	0	0	0	0	0	0.058	0.9	0	0.901
FFAR1	KISS1R	4433988	4433626	9606.ENSP00000246553	9606.ENSP00000234371	0	0	0	0	0	0	0.9	0.058	0.901
HCRTR1	LPAR1	4447115	4444391	9606.ENSP00000384387	9606.ENSP00000363553	0	0	0	0	0	0	0.9	0.056	0.901
SSTR3	CCR2	4451544	4436955	9606.ENSP00000480971	9606.ENSP00000292301	0	0	0	0.71	0	0	0.9	0.075	0.901
CXCL1	S1PR5	4446449	4440026	9606.ENSP00000379110	9606.ENSP00000328472	0	0	0	0	0	0	0.9	0.052	0.901
GPER1	S1PR5	4446636	4440026	9606.ENSP00000380281	9606.ENSP00000328472	0	0	0	0	0	0	0.9	0.058	0.901
SERPINC1	GAS6	4442941	4440301	9606.ENSP00000356671	9606.ENSP00000331831	0	0	0	0	0	0	0.9	0.057	0.901
TRIM4	HECW2	4441812	4434814	9606.ENSP00000348216	9606.ENSP00000260983	0	0	0	0	0.051	0.05	0.9	0	0.901
SSTR3	CXCR2	4451544	4439296	9606.ENSP00000480971	9606.ENSP00000319635	0	0	0	0.751	0	0	0.9	0.082	0.901
GPER1	CCR8	4446636	4439852	9606.ENSP00000380281	9606.ENSP00000326432	0	0	0	0.724	0	0	0.9	0.081	0.901
TRIM4	SOCS3	4441812	4440175	9606.ENSP00000348216	9606.ENSP00000330341	0	0	0	0	0	0.054	0.9	0	0.901
PCGF2	POLR2F	4451633	4448289	9606.ENSP00000482063	9606.ENSP00000403852	0	0	0	0	0	0	0.9	0	0.9
TCTN3	DYNLL1	4451765	4446030	9606.ENSP00000483364	9606.ENSP00000376297	0	0	0	0	0	0	0.9	0	0.9
ADM2	HTR7	4446444	4440833	9606.ENSP00000379087	9606.ENSP00000337949	0	0	0	0	0	0	0.9	0	0.9
CXCL1	PNOC	4446449	4437808	9606.ENSP00000379110	9606.ENSP00000301908	0	0	0	0	0	0	0.9	0	0.9
EDN2	FFAR1	4443976	4433988	9606.ENSP00000361668	9606.ENSP00000246553	0	0	0	0	0	0	0.9	0	0.9
ENAM	GAS6	4446500	4440301	9606.ENSP00000379383	9606.ENSP00000331831	0	0	0	0	0	0	0.9	0	0.9
DYNLL1	CEP41	4446030	4433273	9606.ENSP00000376297	9606.ENSP00000223208	0	0	0	0	0	0	0.9	0	0.9
GPER1	CCR2	4446636	4436955	9606.ENSP00000380281	9606.ENSP00000292301	0	0	0	0.669	0	0	0.9	0.047	0.9
BRE	CBX2	4441333	4438444	9606.ENSP00000343412	9606.ENSP00000308750	0	0	0	0	0	0	0.9	0	0.9
ADAMTS13	THSD1	4443840	4434644	9606.ENSP00000360997	9606.ENSP00000258613	0	0	0	0	0	0	0.9	0	0.9
MUC6	B3GNT7	4448430	4436730	9606.ENSP00000406861	9606.ENSP00000287590	0	0	0	0	0	0	0.9	0	0.9
ITGB2	DYNLL1	4446737	4446030	9606.ENSP00000380948	9606.ENSP00000376297	0	0	0	0	0	0	0.9	0	0.9
TECTA	LYPD5	4446075	4444975	9606.ENSP00000376543	9606.ENSP00000367185	0	0	0	0	0	0	0.9	0	0.9
CYFIP1	PGLYRP1	4451554	4432580	9606.ENSP00000481038	9606.ENSP00000008938	0	0	0	0	0	0	0.9	0	0.9
POLR2F	EGR2	4448289	4433822	9606.ENSP00000403852	9606.ENSP00000242480	0	0	0	0	0	0	0.9	0.05	0.9
GIPR	HRH2	4450851	4444864	9606.ENSP00000467494	9606.ENSP00000366506	0	0	0	0	0	0	0.9	0	0.9
GNAL	OR2B11	4440520	4439787	9606.ENSP00000334051	9606.ENSP00000325682	0	0	0	0	0	0	0.9	0	0.9
ADM2	HTR4	4446444	4442414	9606.ENSP00000379087	9606.ENSP00000353915	0	0	0	0	0	0	0.9	0	0.9
HCRTR1	F2RL1	4447115	4437321	9606.ENSP00000384387	9606.ENSP00000296677	0	0	0	0.585	0	0	0.9	0	0.9
SSTR3	CXCL2	4451544	4449392	9606.ENSP00000480971	9606.ENSP00000427279	0	0	0	0	0	0	0.9	0	0.9
LYPD5	ULBP2	4444975	4442864	9606.ENSP00000367185	9606.ENSP00000356320	0	0	0	0	0	0	0.9	0	0.9
TOP2A	NUPL2	4448614	4434651	9606.ENSP00000411532	9606.ENSP00000258742	0	0	0	0	0	0	0.9	0	0.9
PCBP4	CCNE1	4448877	4435118	9606.ENSP00000417196	9606.ENSP00000262643	0	0	0	0	0	0	0.9	0	0.9
ATF3	CREM	4441415	4435595	9606.ENSP00000344352	9606.ENSP00000265372	0	0	0	0	0.078	0	0.8	0.506	0.9
DYNLL1	NPHP1	4446030	4438844	9606.ENSP00000376297	9606.ENSP00000313169	0	0	0	0	0	0	0.9	0	0.9
CXCR2	PNOC	4439296	4437808	9606.ENSP00000319635	9606.ENSP00000301908	0	0	0	0	0	0	0.9	0	0.9
FCGR1A	TRIM2	4443273	4440975	9606.ENSP00000358165	9606.ENSP00000339659	0	0	0	0	0	0	0.9	0	0.9
S1PR5	PNOC	4440026	4437808	9606.ENSP00000328472	9606.ENSP00000301908	0	0	0	0	0	0	0.9	0	0.9
LYPD5	ALPL	4444975	4444459	9606.ENSP00000367185	9606.ENSP00000363973	0	0	0	0	0	0	0.9	0	0.9
GPER1	CXCR2	4446636	4439296	9606.ENSP00000380281	9606.ENSP00000319635	0	0	0	0.715	0	0	0.9	0.056	0.9
BRE	PHC2	4441333	4434529	9606.ENSP00000343412	9606.ENSP00000257118	0	0	0	0	0	0	0.9	0	0.9
CXCL8	PNOC	4438229	4437808	9606.ENSP00000306512	9606.ENSP00000301908	0	0	0	0	0	0	0.9	0	0.9
SEMA5A	THSD1	4445698	4434644	9606.ENSP00000371936	9606.ENSP00000258613	0	0	0	0	0	0	0.9	0	0.9
MUC16	B3GNT7	4446747	4436730	9606.ENSP00000381008	9606.ENSP00000287590	0	0	0	0	0	0	0.9	0	0.9
HEXB	RETN	4434873	4433169	9606.ENSP00000261416	9606.ENSP00000221515	0	0	0	0	0	0	0.9	0	0.9
PIK3R6	EPS8	4451458	4436418	9606.ENSP00000480157	9606.ENSP00000281172	0	0	0	0	0	0	0.9	0	0.9
F2RL1	KISS1R	4437321	4433626	9606.ENSP00000296677	9606.ENSP00000234371	0	0	0	0.613	0	0	0.9	0	0.9
MUC5B	B3GNT7	4449799	4436730	9606.ENSP00000436812	9606.ENSP00000287590	0	0	0	0	0	0	0.9	0	0.9
CYFIP1	RETN	4451554	4433169	9606.ENSP00000481038	9606.ENSP00000221515	0	0	0	0	0	0	0.9	0	0.9
TSHR	RAMP3	4449981	4433813	9606.ENSP00000441235	9606.ENSP00000242249	0	0	0	0	0	0	0.9	0.044	0.9
ITSN1	SCARB2	4445530	4435511	9606.ENSP00000370719	9606.ENSP00000264896	0	0	0	0	0	0	0.9	0	0.9
CXCL2	PNOC	4449392	4437808	9606.ENSP00000427279	9606.ENSP00000301908	0	0	0	0	0	0	0.9	0	0.9
LYPD5	RTN4RL1	4444975	4440199	9606.ENSP00000367185	9606.ENSP00000330631	0	0	0	0	0	0	0.9	0	0.9
CYFIP1	CXCL1	4451554	4446449	9606.ENSP00000481038	9606.ENSP00000379110	0	0	0	0	0	0	0.9	0	0.9
ENAM	SERPINC1	4446500	4442941	9606.ENSP00000379383	9606.ENSP00000356671	0	0	0	0	0	0	0.9	0	0.9
PCGF2	BRE	4451633	4441333	9606.ENSP00000482063	9606.ENSP00000343412	0	0	0	0	0	0	0.9	0.05	0.9
TSHR	ADM	4449981	4449788	9606.ENSP00000441235	9606.ENSP00000436607	0	0	0	0	0	0	0.9	0.049	0.9
LPAR1	CCR8	4444391	4439852	9606.ENSP00000363553	9606.ENSP00000326432	0	0	0	0	0	0	0.9	0	0.9
CCR8	PNOC	4439852	4437808	9606.ENSP00000326432	9606.ENSP00000301908	0	0	0	0	0	0	0.9	0	0.9
ALPL	ULBP2	4444459	4442864	9606.ENSP00000363973	9606.ENSP00000356320	0	0	0	0	0	0	0.9	0	0.9
EDN2	F2RL1	4443976	4437321	9606.ENSP00000361668	9606.ENSP00000296677	0	0	0	0	0	0	0.9	0.05	0.9
ENAM	ITIH2	4446500	4442116	9606.ENSP00000379383	9606.ENSP00000351190	0	0	0	0	0	0	0.9	0	0.9
ADM2	ADRB1	4446444	4443292	9606.ENSP00000379087	9606.ENSP00000358301	0	0	0	0	0	0	0.9	0.048	0.9
SEMA5A	ADAMTS13	4445698	4443840	9606.ENSP00000371936	9606.ENSP00000360997	0	0	0	0.542	0	0	0.9	0	0.9
TECTA	ULBP2	4446075	4442864	9606.ENSP00000376543	9606.ENSP00000356320	0	0	0	0	0	0	0.9	0	0.9
CNR1	CCR8	4443334	4439852	9606.ENSP00000358513	9606.ENSP00000326432	0	0	0	0	0	0	0.9	0	0.9
OR2T3	GNAL	4442271	4440520	9606.ENSP00000352604	9606.ENSP00000334051	0	0	0	0	0	0	0.9	0	0.9
SOCS3	UBE3C	4440175	4438485	9606.ENSP00000330341	9606.ENSP00000309198	0	0	0	0	0	0	0.9	0	0.9
SSTR3	LPAR1	4451544	4444391	9606.ENSP00000480971	9606.ENSP00000363553	0	0	0	0.572	0	0	0.9	0.05	0.9
FCGR1B	TRIM2	4443305	4440975	9606.ENSP00000358391	9606.ENSP00000339659	0	0	0	0	0	0	0.9	0	0.9
SOCS3	HECW2	4440175	4434814	9606.ENSP00000330341	9606.ENSP00000260983	0	0	0	0	0	0	0.9	0	0.9
ADRB1	RAMP3	4443292	4433813	9606.ENSP00000358301	9606.ENSP00000242249	0	0	0	0	0	0	0.9	0.047	0.9
WASF1	SHB	4446045	4444924	9606.ENSP00000376368	9606.ENSP00000366936	0	0	0	0	0	0	0.9	0	0.9
CYFIP1	FCGR1A	4451554	4443273	9606.ENSP00000481038	9606.ENSP00000358165	0	0	0	0	0	0	0.9	0	0.9
SSTR3	CXCL1	4451544	4446449	9606.ENSP00000480971	9606.ENSP00000379110	0	0	0	0	0	0	0.9	0	0.9
HTR7	RAMP3	4440833	4433813	9606.ENSP00000337949	9606.ENSP00000242249	0	0	0	0	0	0	0.9	0	0.9
ADM	HTR4	4449788	4442414	9606.ENSP00000436607	9606.ENSP00000353915	0	0	0	0	0	0	0.9	0	0.9
GBGT1	HEXB	4443869	4434873	9606.ENSP00000361110	9606.ENSP00000261416	0	0	0	0	0	0	0.9	0	0.9
ULBP2	RTN4RL1	4442864	4440199	9606.ENSP00000356320	9606.ENSP00000330631	0	0	0	0	0	0	0.9	0	0.9
WASF1	FCGR1A	4446045	4443273	9606.ENSP00000376368	9606.ENSP00000358165	0	0	0	0	0	0	0.9	0	0.9
E2F8	MKI67	4451562	4443142	9606.ENSP00000481103	9606.ENSP00000357643	0	0	0	0	0.87	0	0	0.25	0.898
WNT5B	FZD5	4446654	4442500	9606.ENSP00000380379	9606.ENSP00000354607	0	0	0	0	0.049	0.336	0.6	0.611	0.888
ATF3	EGR1	4441415	4433758	9606.ENSP00000344352	9606.ENSP00000239938	0	0	0	0	0.26	0.073	0	0.831	0.874
PACSIN1	RAI14	4451827	4449387	9606.ENSP00000484060	9606.ENSP00000427123	0	0	0	0	0	0.816	0	0.322	0.87
TOP2A	ASF1B	4448614	4435253	9606.ENSP00000411532	9606.ENSP00000263382	0	0	0	0	0.816	0.05	0	0.309	0.869
RSPH3	RSPH6A	4434243	4433170	9606.ENSP00000252655	9606.ENSP00000221538	0	0	0	0	0.134	0	0	0.851	0.866
TNF	RETN	4448041	4433169	9606.ENSP00000398698	9606.ENSP00000221515	0	0	0	0	0.135	0	0	0.849	0.864
TLR5	CXCL8	4449957	4438229	9606.ENSP00000440643	9606.ENSP00000306512	0	0	0	0	0	0	0	0.857	0.858
VANGL1	CELSR1	4441743	4435131	9606.ENSP00000347672	9606.ENSP00000262738	0	0	0	0	0.076	0.185	0	0.823	0.855
FCGR1A	CD163	4443273	4442211	9606.ENSP00000358165	9606.ENSP00000352071	0	0	0	0	0.175	0.478	0	0.683	0.851
RAPGEF3	AKAP6	4447902	4436401	9606.ENSP00000395708	9606.ENSP00000280979	0	0	0	0	0	0.267	0	0.8	0.847
FCGR1A	LILRB3	4443273	4433941	9606.ENSP00000358165	9606.ENSP00000245620	0	0	0	0	0.23	0	0.8	0.082	0.846
GALNTL6	GBGT1	4449243	4443869	9606.ENSP00000423313	9606.ENSP00000361110	0	0	0	0	0	0	0	0.844	0.844
KIAA0226L	ACOT11	4447952	4443721	9606.ENSP00000396935	9606.ENSP00000360366	0	0	0	0	0.841	0	0	0	0.841
RSPH9	RSPH3	4443891	4434243	9606.ENSP00000361238	9606.ENSP00000252655	0	0	0	0	0.135	0	0	0.824	0.841
CDH23	MYO15A	4446856	4432816	9606.ENSP00000381768	9606.ENSP00000205890	0	0	0	0	0.063	0.261	0	0.789	0.841
CDH23	DFNB31	4446856	4442506	9606.ENSP00000381768	9606.ENSP00000354623	0	0	0	0	0	0.19	0	0.81	0.839
CXCR4	HGF	4447439	4433227	9606.ENSP00000386884	9606.ENSP00000222390	0	0	0	0	0.062	0	0	0.835	0.839
LILRA6	FCGR1A	4446536	4443273	9606.ENSP00000379651	9606.ENSP00000358165	0	0	0	0	0.117	0	0.8	0.143	0.835
EGR2	EGR1	4433822	4433758	9606.ENSP00000242480	9606.ENSP00000239938	0	0	0	0.843	0.81	0	0	0.801	0.833
CCDC114	DNALI1	4439204	4437250	9606.ENSP00000318429	9606.ENSP00000296218	0	0	0	0	0.129	0	0.54	0.617	0.833
FAM20A	FAM198B	4450874	4446191	9606.ENSP00000468308	9606.ENSP00000377396	0	0	0	0	0	0	0	0.832	0.832
YES1	FER	4450671	4436411	9606.ENSP00000462468	9606.ENSP00000281092	0	0	0	0.788	0	0.172	0.8	0.09	0.829
TTN	MYOM1	4450840	4441863	9606.ENSP00000467141	9606.ENSP00000348821	0	0	0	0.574	0.086	0.432	0.54	0.752	0.822
NODAL	INHBE	4436709	4435717	9606.ENSP00000287139	9606.ENSP00000266646	0	0	0	0.62	0	0	0.8	0.324	0.822
PLTP	CETP	4448868	4432783	9606.ENSP00000417138	9606.ENSP00000200676	0	0	0	0.598	0	0	0.72	0.904	0.821
E2F8	KIF20A	4451562	4446341	9606.ENSP00000481103	9606.ENSP00000378356	0	0	0	0	0.767	0	0	0.257	0.819
TNF	CXCR4	4448041	4447439	9606.ENSP00000398698	9606.ENSP00000386884	0	0	0	0	0.079	0	0	0.811	0.819
TNF	TLR8	4448041	4438750	9606.ENSP00000398698	9606.ENSP00000312082	0	0	0	0	0.156	0	0	0.794	0.819
RSPH9	CCDC114	4443891	4439204	9606.ENSP00000361238	9606.ENSP00000318429	0	0	0	0	0.354	0	0	0.726	0.815
CETN3	SAC3D1	4449436	4446865	9606.ENSP00000428259	9606.ENSP00000381824	0	0	0	0	0.057	0.715	0	0.368	0.815
PLCD4	PRKCG	4447559	4435262	9606.ENSP00000388631	9606.ENSP00000263431	0	0	0	0	0.063	0.063	0.8	0.067	0.814
TNF	TLR7	4448041	4445433	9606.ENSP00000398698	9606.ENSP00000370034	0	0	0	0	0.116	0	0	0.797	0.813
TNF	CXCL1	4448041	4446449	9606.ENSP00000398698	9606.ENSP00000379110	0	0	0	0	0.132	0	0	0.793	0.813
TNF	SOCS3	4448041	4440175	9606.ENSP00000398698	9606.ENSP00000330341	0	0	0	0	0.09	0	0	0.802	0.812
CXCL8	HGF	4438229	4433227	9606.ENSP00000306512	9606.ENSP00000222390	0	0	0	0	0.077	0	0	0.802	0.81
IL23R	CSF2	4439435	4437349	9606.ENSP00000321345	9606.ENSP00000296871	0	0	0	0	0	0	0.6	0.543	0.809
DHRS9	AKR1C1	4447595	4445467	9606.ENSP00000389241	9606.ENSP00000370254	0	0	0	0	0.057	0	0	0.804	0.807
RIMBP3	RIMBP3C	4451767	4447664	9606.ENSP00000483386	9606.ENSP00000390630	0	0	0	0.988	0.07	0.8	0	0.8	0.807
GALNT6	GCNT1	4450107	4448787	9606.ENSP00000444171	9606.ENSP00000415454	0	0	0	0	0.061	0	0.65	0.461	0.807
ENC1	HEXB	4451356	4434873	9606.ENSP00000479101	9606.ENSP00000261416	0	0	0	0	0.051	0	0	0.805	0.807
DFNB31	EPS8	4442506	4436418	9606.ENSP00000354623	9606.ENSP00000281172	0	0	0	0	0.055	0	0	0.804	0.807
ITGA7	ITGB2	4450383	4446737	9606.ENSP00000452120	9606.ENSP00000380948	0	0	0	0	0.062	0.382	0.36	0.54	0.806
ZGLP1	GATA6	4447120	4435874	9606.ENSP00000384434	9606.ENSP00000269216	0	0	0	0	0	0	0	0.805	0.805
PLA2G6	PRKCG	4440425	4435262	9606.ENSP00000333142	9606.ENSP00000263431	0	0	0	0	0.062	0	0.8	0	0.804
DHRS9	DHDH	4447595	4433152	9606.ENSP00000389241	9606.ENSP00000221403	0	0	0	0	0.058	0	0	0.801	0.804
SCN8A	CNTNAP1	4441631	4435462	9606.ENSP00000346534	9606.ENSP00000264638	0	0	0	0	0.107	0	0	0.789	0.804
ZSCAN20	ZNF397	4442599	4440273	9606.ENSP00000355053	9606.ENSP00000331577	0	0	0	0.855	0	0.803	0	0	0.803
GALNT6	GBGT1	4450107	4443869	9606.ENSP00000444171	9606.ENSP00000361110	0	0	0	0	0	0	0	0.802	0.802
RYR1	PDE4D	4442273	4441530	9606.ENSP00000352608	9606.ENSP00000345502	0	0	0	0	0.064	0.52	0.54	0.148	0.8
SERPINC1	FTCD	4442941	4436927	9606.ENSP00000356671	9606.ENSP00000291670	0	0	0	0	0.797	0	0	0.052	0.799
HP	CETP	4441808	4432783	9606.ENSP00000348170	9606.ENSP00000200676	0	0	0	0	0.061	0	0.72	0.291	0.797
DGKZ	PLCD4	4448638	4447559	9606.ENSP00000412178	9606.ENSP00000388631	0	0	0	0	0.066	0.125	0.65	0.37	0.795
DYSF	ANO5	4447438	4438989	9606.ENSP00000386881	9606.ENSP00000315371	0	0	0	0	0.061	0	0	0.79	0.794
ADM5	ADM2	4447808	4446444	9606.ENSP00000393631	9606.ENSP00000379087	0	0	0	0	0	0	0	0.792	0.792
TTN	LMNA	4450840	4443076	9606.ENSP00000467141	9606.ENSP00000357283	0	0	0	0	0.063	0.091	0	0.775	0.792
SV2A	LAMA5	4443265	4434270	9606.ENSP00000358142	9606.ENSP00000252999	0	0	0	0	0	0.379	0.6	0.228	0.791
CXCL1	CSF2	4446449	4437349	9606.ENSP00000379110	9606.ENSP00000296871	0	0	0	0	0.157	0	0	0.762	0.791
PLTP	HP	4448868	4441808	9606.ENSP00000417138	9606.ENSP00000348170	0	0	0	0	0	0	0.72	0.287	0.791
CCDC154	C2orf81	4445834	4436862	9606.ENSP00000373828	9606.ENSP00000290390	0	0	0	0	0	0	0	0.789	0.789
POLR2F	TCEANC2	4448289	4433640	9606.ENSP00000403852	9606.ENSP00000234827	0	0	0	0	0.142	0.715	0	0.203	0.788
TLR5	TNF	4449957	4448041	9606.ENSP00000440643	9606.ENSP00000398698	0	0	0	0	0	0	0	0.788	0.788
TNF	CXCR2	4448041	4439296	9606.ENSP00000398698	9606.ENSP00000319635	0	0	0	0	0.065	0	0	0.776	0.782
SOCS3	OSM	4440175	4432875	9606.ENSP00000330341	9606.ENSP00000215781	0	0	0	0	0.152	0	0	0.747	0.777
ITGA7	COL6A2	4450383	4437672	9606.ENSP00000452120	9606.ENSP00000300527	0	0	0	0	0.101	0	0.6	0.429	0.776
ITGA7	COL4A2	4450383	4442382	9606.ENSP00000452120	9606.ENSP00000353654	0	0	0	0	0.118	0	0.6	0.413	0.775
TTN	FHL1	4450840	4446235	9606.ENSP00000467141	9606.ENSP00000377710	0	0	0	0	0.064	0.379	0	0.642	0.774
ITGA7	FLNC	4450383	4439901	9606.ENSP00000452120	9606.ENSP00000327145	0	0	0	0	0.12	0.16	0.6	0.311	0.769
PRICKLE1	CELSR1	4441486	4435131	9606.ENSP00000345064	9606.ENSP00000262738	0	0	0	0	0.091	0.17	0	0.716	0.767
SOX7	GATA6	4437810	4435874	9606.ENSP00000301921	9606.ENSP00000269216	0	0	0	0	0.06	0.171	0	0.725	0.767
ATP5B	SLC19A2	4434993	4433659	9606.ENSP00000262030	9606.ENSP00000236137	0	0	0	0	0	0.543	0	0.511	0.766
EPHA2	HGF	4442119	4433227	9606.ENSP00000351209	9606.ENSP00000222390	0	0	0	0	0	0.174	0.6	0.348	0.765
CXCL2	TNF	4449392	4448041	9606.ENSP00000427279	9606.ENSP00000398698	0	0	0	0	0.137	0	0	0.735	0.762
PPAPDC3	KIAA1161	4443908	4437426	9606.ENSP00000361338	9606.ENSP00000297625	0	0	0	0	0	0	0	0.761	0.761
TNFAIP3	CXCL8	4451592	4438229	9606.ENSP00000481570	9606.ENSP00000306512	0	0	0	0	0.537	0	0	0.496	0.757
NXN	CNTNAP1	4440789	4435462	9606.ENSP00000337443	9606.ENSP00000264638	0	0	0	0	0	0	0	0.755	0.755
KIF9	SH3PXD2B	4440503	4438532	9606.ENSP00000333942	9606.ENSP00000309714	0	0	0	0	0.061	0.131	0.72	0.05	0.753
GCNT1	HS3ST1	4448787	4432550	9606.ENSP00000415454	9606.ENSP00000002596	0	0	0	0	0	0	0	0.749	0.749
DYNLL1	CCDC114	4446030	4439204	9606.ENSP00000376297	9606.ENSP00000318429	0	0	0	0	0.087	0	0.72	0.095	0.748
TLR7	CXCL8	4445433	4438229	9606.ENSP00000370034	9606.ENSP00000306512	0	0	0	0	0.061	0	0	0.741	0.747
ITGB2	FLNC	4446737	4439901	9606.ENSP00000380948	9606.ENSP00000327145	0	0	0	0	0.064	0.737	0	0.052	0.746
TADA2A	CECR2	4451560	4441131	9606.ENSP00000481091	9606.ENSP00000341219	0	0	0	0	0.064	0.636	0	0.312	0.745
SEC14L2	RNASE1	4451328	4446755	9606.ENSP00000478755	9606.ENSP00000381057	0	0	0	0	0	0	0	0.745	0.745
NLRC4	TLR8	4447203	4438750	9606.ENSP00000385090	9606.ENSP00000312082	0	0	0	0	0.334	0	0	0.631	0.743
TNF	TLR10	4448041	4438459	9606.ENSP00000398698	9606.ENSP00000308925	0	0	0	0	0.061	0	0	0.736	0.742
ITGA7	COL6A3	4450383	4437161	9606.ENSP00000452120	9606.ENSP00000295550	0	0	0	0	0.062	0	0.6	0.365	0.741
PLXNA4	PLXNB1	4442296	4442133	9606.ENSP00000352882	9606.ENSP00000351338	0	0	0	0.815	0	0	0.72	0.435	0.741
HSPG2	COL4A2	4444439	4442382	9606.ENSP00000363827	9606.ENSP00000353654	0	0	0	0	0.275	0.157	0	0.607	0.739
C1QC	CD163	4444427	4442211	9606.ENSP00000363770	9606.ENSP00000352071	0	0	0	0	0.678	0	0	0.217	0.737
TTN	RSPH3	4450840	4434243	9606.ENSP00000467141	9606.ENSP00000252655	0	0	0	0	0	0.736	0	0	0.736
IGF2	WT1	4447717	4440250	9606.ENSP00000391826	9606.ENSP00000331327	0	0	0	0	0	0	0	0.734	0.734
SYBU	STX1A	4448441	4433256	9606.ENSP00000407118	9606.ENSP00000222812	0	0	0	0	0.107	0	0	0.712	0.732
PACSIN1	SOBP	4451827	4439236	9606.ENSP00000484060	9606.ENSP00000318900	0	0	0	0	0.097	0	0	0.714	0.73
SMAD6	ZFYVE9	4436786	4436740	9606.ENSP00000288840	9606.ENSP00000287727	0	0	0	0	0.059	0.43	0	0.537	0.73
GALNTL6	GCNT1	4449243	4448787	9606.ENSP00000423313	9606.ENSP00000415454	0	0	0	0	0	0	0.65	0.26	0.73
HTR7	GNAL	4440833	4440520	9606.ENSP00000337949	9606.ENSP00000334051	0	0	0	0	0.061	0.177	0.6	0.227	0.729
SOCS3	RETN	4440175	4433169	9606.ENSP00000330341	9606.ENSP00000221515	0	0	0	0	0.084	0	0	0.716	0.729
TLR5	NLRC4	4449957	4447203	9606.ENSP00000440643	9606.ENSP00000385090	0	0	0	0	0.111	0	0	0.707	0.728
CXCR4	SOCS3	4447439	4440175	9606.ENSP00000386884	9606.ENSP00000330341	0	0	0	0	0.061	0.379	0	0.571	0.728
GCNT2	HS3ST1	4445238	4432550	9606.ENSP00000368917	9606.ENSP00000002596	0	0	0	0	0	0	0	0.727	0.727
TNF	TNFSF10	4448041	4433796	9606.ENSP00000398698	9606.ENSP00000241261	0	0	0	0	0.094	0	0	0.71	0.726
TLR8	CXCL8	4438750	4438229	9606.ENSP00000312082	9606.ENSP00000306512	0	0	0	0	0.096	0	0	0.71	0.726
TNF	CCND1	4448041	4433391	9606.ENSP00000398698	9606.ENSP00000227507	0	0	0	0	0	0	0	0.725	0.725
TNF	MADCAM1	4448041	4432866	9606.ENSP00000398698	9606.ENSP00000215637	0	0	0	0	0	0	0	0.725	0.725
NSFL1C	UBXN10	4448968	4444503	9606.ENSP00000418529	9606.ENSP00000364240	0	0	0	0	0	0.332	0	0.606	0.725
PDE4D	AKAP6	4441530	4436401	9606.ENSP00000345502	9606.ENSP00000280979	0	0	0	0	0.048	0.379	0	0.571	0.724
BACE2	SEZ6L	4440415	4434073	9606.ENSP00000332979	9606.ENSP00000248933	0	0	0	0	0	0	0	0.723	0.723
IGF2	EPHA2	4447717	4442119	9606.ENSP00000391826	9606.ENSP00000351209	0	0	0	0	0.07	0.262	0.6	0.105	0.721
ATF3	CCND1	4441415	4433391	9606.ENSP00000344352	9606.ENSP00000227507	0	0	0	0	0	0	0	0.721	0.721
LEPR	OSM	4440182	4432875	9606.ENSP00000330393	9606.ENSP00000215781	0	0	0	0	0	0.071	0.6	0.311	0.721
ULBP2	PVRL2	4442864	4434226	9606.ENSP00000356320	9606.ENSP00000252483	0	0	0	0	0	0	0	0.721	0.721
CLDN4	EPHA2	4448519	4442119	9606.ENSP00000409544	9606.ENSP00000351209	0	0	0	0	0.076	0.379	0	0.551	0.72
RYR1	CACNG6	4442273	4434250	9606.ENSP00000352608	9606.ENSP00000252729	0	0	0	0	0	0	0.72	0	0.72
FANCA	BRIP1	4445843	4434671	9606.ENSP00000373952	9606.ENSP00000259008	0	0	0	0	0.126	0	0	0.691	0.719
MKI67	CCND1	4443142	4433391	9606.ENSP00000357643	9606.ENSP00000227507	0	0	0	0	0.076	0	0	0.707	0.718
CNR1	DAGLA	4443334	4434535	9606.ENSP00000358513	9606.ENSP00000257215	0	0	0	0	0.062	0	0	0.712	0.718
DYNLL1	DNALI1	4446030	4437250	9606.ENSP00000376297	9606.ENSP00000296218	0	0	0	0	0.078	0	0.54	0.386	0.717
PTTG1	ASF1B	4446209	4435253	9606.ENSP00000377536	9606.ENSP00000263382	0	0	0	0	0.676	0	0	0.162	0.717
PLTP	ALG1	4448868	4435067	9606.ENSP00000417138	9606.ENSP00000262374	0	0	0	0	0.048	0	0	0.714	0.716
CCND1	HGF	4433391	4433227	9606.ENSP00000227507	9606.ENSP00000222390	0	0	0	0	0	0	0	0.714	0.715
EGR1	CCND1	4433758	4433391	9606.ENSP00000239938	9606.ENSP00000227507	0	0	0	0	0	0.05	0	0.711	0.715
MKI67	ASF1B	4443142	4435253	9606.ENSP00000357643	9606.ENSP00000263382	0	0	0	0	0.657	0	0	0.198	0.713
BEND4	NSUN7	4449157	4445597	9606.ENSP00000421169	9606.ENSP00000371201	0	0	0	0	0	0	0	0.712	0.712
PRICKLE1	SCARB2	4441486	4435511	9606.ENSP00000345064	9606.ENSP00000264896	0	0	0	0	0	0	0	0.71	0.71
CXCL2	CSF2	4449392	4437349	9606.ENSP00000427279	9606.ENSP00000296871	0	0	0	0	0.117	0	0	0.685	0.71
LGR6	RLN1	4442850	4433291	9606.ENSP00000356247	9606.ENSP00000223862	0	0	0	0	0	0	0	0.71	0.71
ADAMTS13	HP	4443840	4441808	9606.ENSP00000360997	9606.ENSP00000348170	0	0	0	0	0.063	0	0	0.703	0.709
NPHP1	NEK8	4438844	4435848	9606.ENSP00000313169	9606.ENSP00000268766	0	0	0	0	0	0	0	0.709	0.709
CXCL8	EGR1	4438229	4433758	9606.ENSP00000306512	9606.ENSP00000239938	0	0	0	0	0.1	0	0	0.69	0.709
ASF1B	PKMYT1	4435253	4435050	9606.ENSP00000263382	9606.ENSP00000262300	0	0	0	0	0.704	0	0	0.059	0.709
TLR10	CXCL8	4438459	4438229	9606.ENSP00000308925	9606.ENSP00000306512	0	0	0	0	0.051	0	0	0.705	0.708
TTN	FLNC	4450840	4439901	9606.ENSP00000467141	9606.ENSP00000327145	0	0	0	0	0.064	0.185	0	0.647	0.708
PTTG1	MKI67	4446209	4443142	9606.ENSP00000377536	9606.ENSP00000357643	0	0	0	0	0.571	0	0	0.331	0.701
SLMO1	KLHL14	4448332	4442241	9606.ENSP00000404700	9606.ENSP00000352314	0	0	0	0	0.062	0	0	0.693	0.7
TNF	CCR2	4448041	4436955	9606.ENSP00000398698	9606.ENSP00000292301	0	0	0	0	0.09	0	0	0.683	0.699
SLC4A8	OSGEP	4448378	4432822	9606.ENSP00000405812	9606.ENSP00000206542	0	0	0	0	0.062	0	0	0.693	0.699
HDAC2	CCND1	4449546	4433391	9606.ENSP00000430432	9606.ENSP00000227507	0	0	0	0	0.062	0.454	0	0.456	0.697
ITGB2	C1QC	4446737	4444427	9606.ENSP00000380948	9606.ENSP00000363770	0	0	0	0	0.46	0	0	0.459	0.695
HGF	OSM	4433227	4432875	9606.ENSP00000222390	9606.ENSP00000215781	0	0	0	0	0.076	0	0	0.683	0.694
SERPINC1	HS3ST1	4442941	4432550	9606.ENSP00000356671	9606.ENSP00000002596	0	0	0	0	0	0	0	0.694	0.694
STRC	MYO15A	4448181	4432816	9606.ENSP00000401513	9606.ENSP00000205890	0	0	0	0	0.073	0	0	0.682	0.693
C1QC	MARCO	4444427	4439239	9606.ENSP00000363770	9606.ENSP00000318916	0	0	0.422	0.629	0.604	0	0	0.263	0.692
MTUS1	PMFBP1	4435005	4433683	9606.ENSP00000262102	9606.ENSP00000237353	0	0	0	0	0	0	0	0.69	0.69
GRAMD3	GRAMD1B	4449350	4448232	9606.ENSP00000426120	9606.ENSP00000402457	0	0	0	0.613	0	0.656	0	0.292	0.69
ARHGEF28	ARHGEF39	4450010	4445045	9606.ENSP00000441913	9606.ENSP00000367638	0	0	0	0	0	0	0	0.689	0.689
CXCR4	CCND1	4447439	4433391	9606.ENSP00000386884	9606.ENSP00000227507	0	0	0	0	0	0	0	0.689	0.689
PPARA	CNR1	4447242	4443334	9606.ENSP00000385523	9606.ENSP00000358513	0	0	0	0	0	0	0	0.688	0.688
EPS8	MYO15A	4436418	4432816	9606.ENSP00000281172	9606.ENSP00000205890	0	0	0	0	0.065	0.109	0	0.653	0.686
CSF2	OSM	4437349	4432875	9606.ENSP00000296871	9606.ENSP00000215781	0	0	0	0	0	0	0	0.685	0.685
KIF5C	MAPK8IP1	4447796	4433790	9606.ENSP00000393379	9606.ENSP00000241014	0	0	0	0	0.206	0.084	0	0.599	0.683
DTX1	EGR2	4434558	4433822	9606.ENSP00000257600	9606.ENSP00000242480	0	0	0	0	0	0.384	0	0.504	0.682
TNF	OSM	4448041	4432875	9606.ENSP00000398698	9606.ENSP00000215781	0	0	0	0	0.31	0	0	0.556	0.681
CXCL1	HGF	4446449	4433227	9606.ENSP00000379110	9606.ENSP00000222390	0	0	0	0	0.063	0	0	0.673	0.681
NLRP2	CASP5	4450148	4446112	9606.ENSP00000445135	9606.ENSP00000376849	0	0	0	0	0	0	0	0.681	0.681
AREG	EPHA2	4446446	4442119	9606.ENSP00000379097	9606.ENSP00000351209	0	0	0	0	0.076	0	0.6	0.204	0.68
TNF	CD163	4448041	4442211	9606.ENSP00000398698	9606.ENSP00000352071	0	0	0	0	0.065	0	0	0.671	0.679
FAM26F	HEXB	4443132	4434873	9606.ENSP00000357594	9606.ENSP00000261416	0	0	0	0	0	0	0	0.677	0.677
NEFL	MAPT	4451641	4441081	9606.ENSP00000482169	9606.ENSP00000340820	0	0	0	0	0.158	0	0	0.632	0.677
GSTM4	CYP2A6	4443403	4437722	9606.ENSP00000358851	9606.ENSP00000301141	0	0	0	0	0	0.077	0.65	0.082	0.677
TLR7	CSF2	4445433	4437349	9606.ENSP00000370034	9606.ENSP00000296871	0	0	0	0	0	0	0	0.677	0.677
TTN	ANK1	4450840	4435633	9606.ENSP00000467141	9606.ENSP00000265709	0	0	0	0	0.062	0.435	0	0.44	0.677
TRIOBP	MYO15A	4447103	4432816	9606.ENSP00000384312	9606.ENSP00000205890	0	0	0	0	0.062	0	0	0.669	0.676
SLC1A3	SLC7A5	4435561	4434914	9606.ENSP00000265113	9606.ENSP00000261622	0	0	0	0	0.061	0.085	0	0.652	0.675
MAPT	MAP1B	4441081	4437332	9606.ENSP00000340820	9606.ENSP00000296755	0	0	0	0	0.137	0.161	0	0.587	0.675
ITGA7	TNXB	4450383	4448463	9606.ENSP00000452120	9606.ENSP00000407685	0	0	0	0	0.125	0	0.6	0.145	0.674
JPH4	RYR1	4446639	4442273	9606.ENSP00000380307	9606.ENSP00000352608	0	0	0	0	0.198	0	0.36	0.41	0.67
LEPR	CSF2	4440182	4437349	9606.ENSP00000330393	9606.ENSP00000296871	0	0	0	0	0	0	0.6	0.21	0.67
TLR5	CSF2	4449957	4437349	9606.ENSP00000440643	9606.ENSP00000296871	0	0	0	0	0	0	0	0.669	0.669
ACOT11	IFT80	4443721	4438823	9606.ENSP00000360366	9606.ENSP00000312778	0	0	0	0	0.666	0	0	0.05	0.669
TNFSF15	IL23R	4444313	4439435	9606.ENSP00000363157	9606.ENSP00000321345	0	0	0	0	0	0	0	0.668	0.668
TLR8	CSF2	4438750	4437349	9606.ENSP00000312082	9606.ENSP00000296871	0	0	0	0	0	0	0	0.668	0.668
KIF20A	PKMYT1	4446341	4435050	9606.ENSP00000378356	9606.ENSP00000262300	0	0	0	0	0.578	0.133	0	0.164	0.668
RSPH9	DNALI1	4443891	4437250	9606.ENSP00000361238	9606.ENSP00000296218	0	0	0	0	0.171	0	0	0.613	0.666
CYFIP1	AMZ1	4451554	4438388	9606.ENSP00000481038	9606.ENSP00000308149	0	0	0	0	0	0.666	0	0	0.666
WASF1	AMZ1	4446045	4438388	9606.ENSP00000376368	9606.ENSP00000308149	0	0	0	0	0	0.666	0	0	0.666
BEST3	KCNMB4	4440356	4434602	9606.ENSP00000332413	9606.ENSP00000258111	0	0	0	0	0	0	0	0.666	0.666
ITGA7	COL4A4	4450383	4446575	9606.ENSP00000452120	9606.ENSP00000379866	0	0	0	0	0.063	0	0.6	0.178	0.665
ADRB1	GNAL	4443292	4440520	9606.ENSP00000358301	9606.ENSP00000334051	0	0	0	0	0	0.177	0.6	0.062	0.664
PDE4D	AK8	4441530	4437499	9606.ENSP00000345502	9606.ENSP00000298545	0	0	0	0	0.063	0	0.65	0.058	0.664
TNF	ATF3	4448041	4441415	9606.ENSP00000398698	9606.ENSP00000344352	0	0	0	0	0.078	0	0	0.65	0.664
HTR4	GNAL	4442414	4440520	9606.ENSP00000353915	9606.ENSP00000334051	0	0	0	0	0.062	0.177	0.6	0	0.664
PIANP	TMEM8A	4450023	4448169	9606.ENSP00000442157	9606.ENSP00000401338	0	0	0	0	0.062	0	0	0.656	0.663
PIK3R6	DHDH	4451458	4433152	9606.ENSP00000480157	9606.ENSP00000221403	0	0	0	0	0	0	0	0.663	0.663
HRH2	GNAL	4444864	4440520	9606.ENSP00000366506	9606.ENSP00000334051	0	0	0	0	0.061	0.177	0.6	0	0.663
DYSF	EHD2	4447438	4435232	9606.ENSP00000386881	9606.ENSP00000263277	0	0	0	0	0.064	0.261	0	0.55	0.662
CETN3	IFT140	4449436	4448388	9606.ENSP00000428259	9606.ENSP00000406012	0	0	0	0	0.05	0	0	0.658	0.661
TLR8	CCR2	4438750	4436955	9606.ENSP00000312082	9606.ENSP00000292301	0	0	0	0	0.334	0	0	0.512	0.661
BNC2	CNTLN	4445434	4445430	9606.ENSP00000370047	9606.ENSP00000370021	0	0	0	0	0	0	0	0.661	0.661
TRPM2	ZNF451	4446749	4443605	9606.ENSP00000381023	9606.ENSP00000359740	0	0	0	0	0.061	0	0	0.652	0.66
MYO7B	CDH23	4448771	4446856	9606.ENSP00000415090	9606.ENSP00000381768	0	0	0	0	0.098	0.34	0	0.474	0.659
JADE3	ZNF608	4451618	4438353	9606.ENSP00000481850	9606.ENSP00000307746	0	0	0	0	0	0	0	0.659	0.659
KLHL30	HEXB	4447370	4434873	9606.ENSP00000386389	9606.ENSP00000261416	0	0	0	0	0.051	0	0	0.655	0.658
WT1	CCND1	4440250	4433391	9606.ENSP00000331327	9606.ENSP00000227507	0	0	0	0	0	0.05	0	0.655	0.658
CCNE1	PKMYT1	4435118	4435050	9606.ENSP00000262643	9606.ENSP00000262300	0	0	0	0	0.256	0.266	0	0.424	0.658
PGF	HGF	4450339	4433227	9606.ENSP00000451040	9606.ENSP00000222390	0	0	0	0	0	0	0	0.658	0.658
PEG10	IGF2	4448998	4447717	9606.ENSP00000418944	9606.ENSP00000391826	0	0	0	0	0.095	0	0	0.638	0.658
IGF2	GLI1	4447717	4433423	9606.ENSP00000391826	9606.ENSP00000228682	0	0	0	0	0.06	0	0	0.651	0.658
SPNS2	S1PR5	4440442	4440026	9606.ENSP00000333292	9606.ENSP00000328472	0	0	0	0	0.061	0	0	0.649	0.657
ITGB2	TLR7	4446737	4445433	9606.ENSP00000380948	9606.ENSP00000370034	0	0	0	0	0.54	0.062	0	0.267	0.656
SIGLEC11	CEACAM6	4448647	4432774	9606.ENSP00000412361	9606.ENSP00000199764	0	0	0	0	0	0	0	0.655	0.655
PGF	EPHA2	4450339	4442119	9606.ENSP00000451040	9606.ENSP00000351209	0	0	0	0	0	0	0.6	0.172	0.654
IL23R	OSM	4439435	4432875	9606.ENSP00000321345	9606.ENSP00000215781	0	0	0	0	0	0	0.6	0.172	0.654
SHB	EPS8	4444924	4436418	9606.ENSP00000366936	9606.ENSP00000281172	0	0	0	0	0	0.294	0	0.53	0.654
NUDT11	SEC61B	4444660	4433288	9606.ENSP00000365160	9606.ENSP00000223641	0	0	0	0	0.064	0.645	0	0	0.653
NEFL	TRIM2	4451641	4440975	9606.ENSP00000482169	9606.ENSP00000339659	0	0	0	0	0.153	0.299	0	0.462	0.653
TNFAIP3	CXCL2	4451592	4449392	9606.ENSP00000481570	9606.ENSP00000427279	0	0	0	0	0.364	0	0	0.474	0.652
IGF2	EGR1	4447717	4433758	9606.ENSP00000391826	9606.ENSP00000239938	0	0	0	0	0.066	0	0	0.643	0.652
NLRC4	TLR7	4447203	4445433	9606.ENSP00000385090	9606.ENSP00000370034	0	0	0	0	0.095	0	0	0.63	0.651
POLR2F	ENTPD2	4448289	4441701	9606.ENSP00000403852	9606.ENSP00000347213	0	0	0	0	0	0	0.65	0	0.65
CD200	TNF	4449108	4448041	9606.ENSP00000420298	9606.ENSP00000398698	0	0	0	0	0	0	0	0.65	0.65
TLR10	CSF2	4438459	4437349	9606.ENSP00000308925	9606.ENSP00000296871	0	0	0	0	0	0	0	0.65	0.65
KIAA0226L	IFT80	4447952	4438823	9606.ENSP00000396935	9606.ENSP00000312778	0	0	0	0	0.649	0	0	0	0.649
HP	MSR1	4441808	4435004	9606.ENSP00000348170	9606.ENSP00000262101	0	0	0	0	0.063	0	0.54	0.251	0.649
CD163	CCR2	4442211	4436955	9606.ENSP00000352071	9606.ENSP00000292301	0	0	0	0	0.088	0	0	0.63	0.648
SLC7A11	SLC1A3	4436386	4435561	9606.ENSP00000280612	9606.ENSP00000265113	0	0	0	0	0.061	0.085	0	0.622	0.647
NEFL	ARHGEF28	4451641	4450010	9606.ENSP00000482169	9606.ENSP00000441913	0	0	0	0	0	0	0	0.647	0.647
KLHL29	HEXB	4449135	4434873	9606.ENSP00000420659	9606.ENSP00000261416	0	0	0	0	0.051	0	0	0.642	0.646
PACSIN1	KCNMB4	4451827	4434602	9606.ENSP00000484060	9606.ENSP00000258111	0	0	0	0	0.103	0	0	0.621	0.646
LOXHD1	MYO15A	4437680	4432816	9606.ENSP00000300591	9606.ENSP00000205890	0	0	0	0	0	0	0	0.646	0.646
MEGF11	DTX1	4447444	4434558	9606.ENSP00000386908	9606.ENSP00000257600	0	0	0	0	0.065	0	0	0.637	0.646
PRICKLE3	CELSR1	4450950	4435131	9606.ENSP00000470248	9606.ENSP00000262738	0	0	0	0	0.091	0.17	0	0.568	0.646
SYBU	STX1B	4448441	4432855	9606.ENSP00000407118	9606.ENSP00000215095	0	0	0	0	0.097	0	0	0.625	0.646
MKI67	PKMYT1	4443142	4435050	9606.ENSP00000357643	9606.ENSP00000262300	0	0	0	0	0.544	0	0	0.256	0.646
SMAD7	CCND1	4435020	4433391	9606.ENSP00000262158	9606.ENSP00000227507	0	0	0	0	0.059	0	0	0.638	0.645
SYT17	STX1A	4441730	4433256	9606.ENSP00000347538	9606.ENSP00000222812	0	0	0	0	0.065	0.3	0	0.501	0.645
CREB5	CREM	4442040	4435595	9606.ENSP00000350359	9606.ENSP00000265372	0	0	0	0	0	0	0.6	0.151	0.645
SYBU	CDC42EP1	4448441	4434079	9606.ENSP00000407118	9606.ENSP00000249014	0	0	0	0	0	0	0	0.644	0.644
PARS2	AARS2	4443717	4433903	9606.ENSP00000360327	9606.ENSP00000244571	0	0	0	0	0.246	0	0	0.546	0.643
ITGA7	ADAM12	4450383	4443148	9606.ENSP00000452120	9606.ENSP00000357668	0	0	0	0	0	0	0	0.642	0.642
TLR7	CCR2	4445433	4436955	9606.ENSP00000370034	9606.ENSP00000292301	0	0	0	0	0.242	0	0	0.547	0.642
NLRC4	TLR10	4447203	4438459	9606.ENSP00000385090	9606.ENSP00000308925	0	0	0	0	0.062	0	0	0.634	0.642
NDN	LEPR	4440378	4440182	9606.ENSP00000332643	9606.ENSP00000330393	0	0	0	0	0	0.354	0	0.468	0.642
GRAMD3	ZNF608	4449350	4438353	9606.ENSP00000426120	9606.ENSP00000307746	0	0	0	0	0	0	0	0.642	0.642
LEPR	RETN	4440182	4433169	9606.ENSP00000330393	9606.ENSP00000221515	0	0	0	0	0	0	0	0.642	0.642
DLG5	PGLYRP1	4443928	4432580	9606.ENSP00000361467	9606.ENSP00000008938	0	0	0	0	0	0	0	0.641	0.641
ENSG00000204176	STX1A	4444370	4433256	9606.ENSP00000363441	9606.ENSP00000222812	0	0	0	0	0	0.3	0	0.507	0.64
TNF	HGF	4448041	4433227	9606.ENSP00000398698	9606.ENSP00000222390	0	0	0	0	0	0	0	0.64	0.64
ULBP2	CCR8	4442864	4439852	9606.ENSP00000356320	9606.ENSP00000326432	0	0	0	0	0	0	0	0.64	0.64
PEG10	PPP1R9A	4448998	4448365	9606.ENSP00000418944	9606.ENSP00000405514	0	0	0	0	0.098	0	0	0.616	0.639
STRC	CDH23	4448181	4446856	9606.ENSP00000401513	9606.ENSP00000381768	0	0	0	0	0	0	0	0.638	0.638
PLTP	MSR1	4448868	4435004	9606.ENSP00000417138	9606.ENSP00000262101	0	0	0	0	0.061	0	0.54	0.231	0.638
NRARP	DTX1	4441884	4434558	9606.ENSP00000349041	9606.ENSP00000257600	0	0	0	0	0	0	0	0.638	0.638
CREB5	COL6A3	4442040	4437161	9606.ENSP00000350359	9606.ENSP00000295550	0	0	0	0	0	0	0	0.638	0.638
SERPINC1	HP	4442941	4441808	9606.ENSP00000356671	9606.ENSP00000348170	0	0	0	0	0.169	0.129	0	0.54	0.638
PGF	CXCL8	4450339	4438229	9606.ENSP00000451040	9606.ENSP00000306512	0	0	0	0	0	0	0	0.638	0.638
FCGR1A	CCR2	4443273	4436955	9606.ENSP00000358165	9606.ENSP00000292301	0	0	0	0	0.171	0	0	0.58	0.637
CXCR4	GLI1	4447439	4433423	9606.ENSP00000386884	9606.ENSP00000228682	0	0	0	0	0.062	0.05	0	0.624	0.636
TNF	CASP5	4448041	4446112	9606.ENSP00000398698	9606.ENSP00000376849	0	0	0	0	0.146	0.092	0	0.567	0.635
MSR1	CETP	4435004	4432783	9606.ENSP00000262101	9606.ENSP00000200676	0	0	0	0	0.061	0	0.54	0.221	0.634
VANGL1	FZD2	4441743	4439648	9606.ENSP00000347672	9606.ENSP00000323901	0	0	0	0	0.09	0.185	0	0.545	0.633
CLDN4	BEST3	4448519	4440356	9606.ENSP00000409544	9606.ENSP00000332413	0	0	0	0	0	0	0.54	0.236	0.633
TNF	TNFSF9	4448041	4433948	9606.ENSP00000398698	9606.ENSP00000245817	0	0	0	0	0.107	0.124	0	0.568	0.633
TOP2A	PHC2	4448614	4434529	9606.ENSP00000411532	9606.ENSP00000257118	0	0	0	0	0	0.632	0	0	0.632
NRG1	ZNF804A	4447144	4437949	9606.ENSP00000384620	9606.ENSP00000303252	0	0	0	0	0	0	0	0.631	0.631
E2F8	CCND1	4451562	4433391	9606.ENSP00000481103	9606.ENSP00000227507	0	0	0	0	0	0.101	0	0.606	0.631
SEMA5A	PLXNA4	4445698	4442296	9606.ENSP00000371936	9606.ENSP00000352882	0	0	0	0.544	0.061	0.355	0	0.913	0.63
SMAD7	HGF	4435020	4433227	9606.ENSP00000262158	9606.ENSP00000222390	0	0	0	0	0	0	0	0.628	0.628
STRC	COCH	4448181	4446573	9606.ENSP00000401513	9606.ENSP00000379862	0	0	0	0	0	0	0	0.627	0.627
TLR5	IRAK2	4449957	4434487	9606.ENSP00000440643	9606.ENSP00000256458	0	0	0	0	0	0.177	0	0.566	0.627
HDAC2	SUV39H2	4449546	4441678	9606.ENSP00000430432	9606.ENSP00000346997	0.043	0	0	0	0.087	0.264	0	0.487	0.626
NR4A2	EGR1	4441430	4433758	9606.ENSP00000344479	9606.ENSP00000239938	0	0	0	0	0.199	0.063	0	0.542	0.626
ZBTB32	PRDM1	4445996	4443256	9606.ENSP00000376035	9606.ENSP00000358092	0	0	0	0.577	0.06	0.472	0	0.668	0.625
IRAK2	TNFSF9	4434487	4433948	9606.ENSP00000256458	9606.ENSP00000245817	0	0	0	0	0	0.313	0	0.475	0.624
TTN	RYR1	4450840	4442273	9606.ENSP00000467141	9606.ENSP00000352608	0	0	0	0	0.147	0.046	0	0.576	0.624
TNF	HP	4448041	4441808	9606.ENSP00000398698	9606.ENSP00000348170	0	0	0	0	0	0	0	0.621	0.621
CCDC180	CDK18	4449721	4449260	9606.ENSP00000434727	9606.ENSP00000423665	0	0	0	0	0	0	0	0.62	0.62
FICD	ZNF451	4450200	4443605	9606.ENSP00000446479	9606.ENSP00000359740	0	0	0	0	0	0	0	0.619	0.619
TMEM139	OSGEP	4442237	4432822	9606.ENSP00000352284	9606.ENSP00000206542	0	0	0	0	0	0	0	0.619	0.619
PTPRF	RTN4RL1	4442313	4440199	9606.ENSP00000353030	9606.ENSP00000330631	0	0	0	0	0.066	0.063	0	0.599	0.619
KMO	FTCD	4442693	4436927	9606.ENSP00000355517	9606.ENSP00000291670	0	0	0	0	0.581	0	0	0.126	0.618
CSF2	CCR2	4437349	4436955	9606.ENSP00000296871	9606.ENSP00000292301	0	0	0	0	0	0	0	0.618	0.618
NRARP	HEY1	4441884	4440859	9606.ENSP00000349041	9606.ENSP00000338272	0	0	0	0	0.083	0	0	0.6	0.617
MKI67	CCNE1	4443142	4435118	9606.ENSP00000357643	9606.ENSP00000262643	0	0	0	0	0.181	0	0	0.551	0.617
NRG1	AREG	4447144	4446446	9606.ENSP00000384620	9606.ENSP00000379097	0	0	0	0	0	0	0	0.616	0.616
EGR1	HGF	4433758	4433227	9606.ENSP00000239938	9606.ENSP00000222390	0	0	0	0	0	0	0	0.615	0.615
CNTNAP1	SPTBN4	4435462	4435249	9606.ENSP00000264638	9606.ENSP00000263373	0	0	0	0	0.14	0	0	0.571	0.615
KIF20A	PLK2	4446341	4436123	9606.ENSP00000378356	9606.ENSP00000274289	0	0	0	0	0.25	0.293	0	0.33	0.614
CXCL1	TLR7	4446449	4445433	9606.ENSP00000379110	9606.ENSP00000370034	0	0	0	0	0.061	0	0	0.606	0.614
TOP2A	PKMYT1	4448614	4435050	9606.ENSP00000411532	9606.ENSP00000262300	0	0	0	0	0.475	0	0	0.293	0.613
TNF	FCGR1A	4448041	4443273	9606.ENSP00000398698	9606.ENSP00000358165	0	0	0	0	0.115	0	0	0.58	0.613
TTN	DYSF	4450840	4447438	9606.ENSP00000467141	9606.ENSP00000386881	0	0	0	0	0.061	0.131	0	0.564	0.613
WNT5B	VANGL1	4446654	4441743	9606.ENSP00000380379	9606.ENSP00000347672	0	0	0	0	0.057	0.185	0	0.535	0.612
SAC3D1	PKMYT1	4446865	4435050	9606.ENSP00000381824	9606.ENSP00000262300	0	0	0	0	0.135	0	0	0.57	0.612
PLA2G6	GNA11	4440425	4432654	9606.ENSP00000333142	9606.ENSP00000078429	0	0	0	0	0	0	0.6	0.068	0.611
YPEL4	FNDC5	4449637	4444192	9606.ENSP00000432648	9606.ENSP00000362570	0	0	0	0	0.098	0	0	0.586	0.611
TLR10	IRAK2	4438459	4434487	9606.ENSP00000308925	9606.ENSP00000256458	0	0	0	0	0.061	0.177	0	0.537	0.611
CEACAM19	CD163	4447176	4442211	9606.ENSP00000384887	9606.ENSP00000352071	0	0	0	0	0	0	0	0.611	0.611
NR4A3	EGR2	4451630	4433822	9606.ENSP00000482027	9606.ENSP00000242480	0	0	0	0	0.154	0.063	0	0.546	0.609
ITGB2	MYO15A	4446737	4432816	9606.ENSP00000380948	9606.ENSP00000205890	0	0	0	0	0.051	0.579	0	0.099	0.608
CSF2	CCND1	4437349	4433391	9606.ENSP00000296871	9606.ENSP00000227507	0	0	0	0	0	0	0	0.608	0.608
DGKZ	GPD2	4448638	4438431	9606.ENSP00000412178	9606.ENSP00000308610	0	0	0	0	0.062	0	0.6	0	0.608
TNF	LMNA	4448041	4443076	9606.ENSP00000398698	9606.ENSP00000357283	0	0	0	0	0	0.302	0	0.46	0.607
MST1R	HGF	4437287	4433227	9606.ENSP00000296474	9606.ENSP00000222390	0	0	0	0	0.049	0.05	0	0.598	0.606
PACSIN1	LRFN2	4451827	4441573	9606.ENSP00000484060	9606.ENSP00000345985	0	0	0	0	0.348	0	0	0.419	0.605
CREB5	PRKCG	4442040	4435262	9606.ENSP00000350359	9606.ENSP00000263431	0	0	0	0	0	0	0.6	0.052	0.604
GOLGA8K	CHRFAM7A	4449374	4437608	9606.ENSP00000426691	9606.ENSP00000299847	0	0	0	0	0.098	0	0	0.58	0.604
TLR5	CXCL1	4449957	4446449	9606.ENSP00000440643	9606.ENSP00000379110	0	0	0	0	0	0	0	0.604	0.604
CXCL8	RETN	4438229	4433169	9606.ENSP00000306512	9606.ENSP00000221515	0	0	0	0	0.088	0	0	0.583	0.603
CDK18	CCNE1	4449260	4435118	9606.ENSP00000423665	9606.ENSP00000262643	0	0	0	0	0.111	0.412	0	0.3	0.602
FCGR1A	CR1	4443273	4442796	9606.ENSP00000358165	9606.ENSP00000356016	0	0	0	0	0.088	0	0	0.58	0.6
PIK3R6	LPAR1	4451458	4444391	9606.ENSP00000480157	9606.ENSP00000363553	0	0	0	0	0	0	0.6	0	0.6
TNF	IL23R	4448041	4439435	9606.ENSP00000398698	9606.ENSP00000321345	0	0	0	0	0.062	0	0	0.59	0.599
CR1	CXCL8	4442796	4438229	9606.ENSP00000356016	9606.ENSP00000306512	0	0	0	0	0	0	0	0.599	0.599
DACH1	CCND1	4451650	4433391	9606.ENSP00000482245	9606.ENSP00000227507	0	0	0	0	0	0	0	0.598	0.598
SOCS3	CXCL8	4440175	4438229	9606.ENSP00000330341	9606.ENSP00000306512	0	0	0	0	0.175	0	0	0.533	0.598
CSF2	EGR1	4437349	4433758	9606.ENSP00000296871	9606.ENSP00000239938	0	0	0	0	0	0	0	0.597	0.597
IFT140	KBTBD12	4448388	4447292	9606.ENSP00000406012	9606.ENSP00000385957	0	0	0	0	0.055	0	0	0.591	0.597
DLG5	PARD6G	4443928	4441311	9606.ENSP00000361467	9606.ENSP00000343144	0	0	0	0	0	0.312	0	0.439	0.597
PRRT2	SV2A	4450531	4443265	9606.ENSP00000456226	9606.ENSP00000358142	0	0	0	0	0.119	0	0	0.559	0.595
CD163	TLR8	4442211	4438750	9606.ENSP00000352071	9606.ENSP00000312082	0	0	0	0	0.323	0	0	0.425	0.594
CHAC1	ATF3	4448011	4441415	9606.ENSP00000398105	9606.ENSP00000344352	0	0	0	0	0.177	0	0	0.527	0.594
GBGT1	PHC2	4443869	4434529	9606.ENSP00000361110	9606.ENSP00000257118	0	0	0	0	0	0.157	0	0.537	0.593
MYO7B	DFNB31	4448771	4442506	9606.ENSP00000415090	9606.ENSP00000354623	0	0	0	0	0	0.185	0	0.521	0.593
CDH23	LOXHD1	4446856	4437680	9606.ENSP00000381768	9606.ENSP00000300591	0	0	0	0	0.098	0	0	0.567	0.592
FHL1	LMNA	4446235	4443076	9606.ENSP00000377710	9606.ENSP00000357283	0	0	0	0	0	0.075	0	0.577	0.592
CXCR4	CSF2	4447439	4437349	9606.ENSP00000386884	9606.ENSP00000296871	0	0	0	0	0	0	0	0.591	0.591
RAPGEF3	SOCS3	4447902	4440175	9606.ENSP00000395708	9606.ENSP00000330341	0	0	0	0	0	0	0	0.591	0.591
TNFAIP3	IL23R	4451592	4439435	9606.ENSP00000481570	9606.ENSP00000321345	0	0	0	0	0.061	0	0	0.582	0.59
CXCL2	TLR7	4449392	4445433	9606.ENSP00000427279	9606.ENSP00000370034	0	0	0	0	0.061	0	0	0.581	0.59
CD163	CSF2	4442211	4437349	9606.ENSP00000352071	9606.ENSP00000296871	0	0	0	0	0	0	0	0.59	0.59
RIMBP3	MAPK8IP1	4451767	4433790	9606.ENSP00000483386	9606.ENSP00000241014	0	0	0	0	0.064	0.552	0	0.1	0.589
RIMBP3C	MAPK8IP1	4447664	4433790	9606.ENSP00000390630	9606.ENSP00000241014	0	0	0	0	0.064	0.552	0	0.1	0.589
ADAMTS13	SERPINC1	4443840	4442941	9606.ENSP00000360997	9606.ENSP00000356671	0	0	0	0	0.061	0	0	0.581	0.589
COCH	MYO15A	4446573	4432816	9606.ENSP00000379862	9606.ENSP00000205890	0	0	0	0	0.061	0.086	0	0.56	0.589
SEMA5A	EPHB3	4445698	4440327	9606.ENSP00000371936	9606.ENSP00000332118	0	0	0	0	0.061	0.059	0	0.571	0.588
C1S	CR1	4447198	4442796	9606.ENSP00000385035	9606.ENSP00000356016	0	0	0	0	0	0	0	0.588	0.588
ALPL	ENTPD2	4444459	4441701	9606.ENSP00000363973	9606.ENSP00000347213	0	0	0	0	0.061	0	0	0.579	0.588
FOXA3	GATA6	4438012	4435874	9606.ENSP00000304004	9606.ENSP00000269216	0	0	0	0	0.083	0.153	0	0.511	0.587
TNFAIP3	IRAK2	4451592	4434487	9606.ENSP00000481570	9606.ENSP00000256458	0	0	0	0	0.085	0.349	0	0.361	0.587
UBXN10	IFT81	4444503	4433825	9606.ENSP00000364240	9606.ENSP00000242591	0	0	0	0	0	0.332	0	0.407	0.587
PEG10	NDN	4448998	4440378	9606.ENSP00000418944	9606.ENSP00000332643	0	0	0	0	0.061	0	0	0.579	0.587
E2F8	CCNE1	4451562	4435118	9606.ENSP00000481103	9606.ENSP00000262643	0	0	0	0	0.174	0.169	0	0.446	0.586
STRC	LOXHD1	4448181	4437680	9606.ENSP00000401513	9606.ENSP00000300591	0	0	0	0	0	0	0	0.586	0.586
EDA2R	CHADL	4446492	4432934	9606.ENSP00000379365	9606.ENSP00000216241	0	0	0	0	0	0	0	0.586	0.586
SH2D2A	SHB	4446004	4444924	9606.ENSP00000376123	9606.ENSP00000366936	0	0	0	0	0	0	0	0.586	0.586
FCGR1A	TLR8	4443273	4438750	9606.ENSP00000358165	9606.ENSP00000312082	0	0	0	0	0.382	0	0	0.357	0.585
CD163	MARCO	4442211	4439239	9606.ENSP00000352071	9606.ENSP00000318916	0	0	0	0.601	0.521	0	0	0.366	0.585
KLHL30	MYLK4	4447370	4436151	9606.ENSP00000386389	9606.ENSP00000274643	0	0	0	0	0.585	0	0	0	0.585
SPIB	PRDM1	4451014	4443256	9606.ENSP00000471921	9606.ENSP00000358092	0	0	0	0	0.061	0.124	0	0.536	0.585
CD163	SLAMF8	4442211	4436821	9606.ENSP00000352071	9606.ENSP00000289707	0	0	0	0	0.557	0	0	0.103	0.585
RSPH10B2	MFSD6L	4447161	4440152	9606.ENSP00000384766	9606.ENSP00000330051	0	0	0	0	0.063	0	0	0.574	0.583
TBX1	HGF	4440299	4433227	9606.ENSP00000331791	9606.ENSP00000222390	0	0	0	0	0	0	0	0.583	0.583
CYFIP1	MAP1B	4451554	4437332	9606.ENSP00000481038	9606.ENSP00000296755	0	0	0	0	0.064	0.294	0	0.421	0.583
DYSF	LMNA	4447438	4443076	9606.ENSP00000386881	9606.ENSP00000357283	0	0	0	0	0.062	0.13	0	0.53	0.583
THAP9	THAP8	4438136	4436996	9606.ENSP00000305533	9606.ENSP00000292894	0	0	0	0	0	0	0	0.583	0.583
KLHL30	KLHL34	4447370	4445224	9606.ENSP00000386389	9606.ENSP00000368813	0	0	0	0.619	0.583	0	0	0	0.583
CXCL8	OSM	4438229	4432875	9606.ENSP00000306512	9606.ENSP00000215781	0	0	0	0	0.182	0	0	0.51	0.582
FAM177B	ALS2CR11	4448736	4448531	9606.ENSP00000414451	9606.ENSP00000409937	0	0	0	0	0	0	0	0.582	0.582
TTN	KLHL34	4450840	4445224	9606.ENSP00000467141	9606.ENSP00000368813	0	0	0	0	0.427	0.3	0	0	0.581
IL23R	IL26	4439435	4433445	9606.ENSP00000321345	9606.ENSP00000229134	0	0	0	0	0	0	0	0.581	0.581
TNF	MCAM	4448041	4435364	9606.ENSP00000398698	9606.ENSP00000264036	0	0	0	0	0	0	0	0.58	0.58
ZFHX2	ZFYVE27	4448689	4446174	9606.ENSP00000413418	9606.ENSP00000377282	0	0	0	0	0	0	0	0.58	0.58
TNF	ITGB2	4448041	4446737	9606.ENSP00000398698	9606.ENSP00000380948	0	0	0	0	0.221	0.064	0	0.47	0.579
GNAL	GNA11	4440520	4432654	9606.ENSP00000334051	9606.ENSP00000078429	0	0	0	0.897	0.062	0	0.54	0.621	0.578
RAB40C	PLXNB1	4449871	4442133	9606.ENSP00000438492	9606.ENSP00000351338	0	0	0	0	0.095	0	0	0.552	0.578
MTHFSD	MYCBPAP	4442433	4439584	9606.ENSP00000354152	9606.ENSP00000323184	0	0	0	0	0	0	0	0.577	0.577
TLR5	CXCL2	4449957	4449392	9606.ENSP00000440643	9606.ENSP00000427279	0	0	0	0	0	0	0	0.577	0.577
MDN1	PHC2	4443307	4434529	9606.ENSP00000358400	9606.ENSP00000257118	0	0	0	0	0	0	0	0.577	0.577
ALS2CR11	RIMBP3C	4448531	4447664	9606.ENSP00000409937	9606.ENSP00000390630	0	0	0	0	0	0	0	0.577	0.577
IGF2	FCGR1B	4447717	4443305	9606.ENSP00000391826	9606.ENSP00000358391	0	0	0	0	0.055	0	0	0.57	0.576
CISH	TNF	4448513	4448041	9606.ENSP00000409346	9606.ENSP00000398698	0	0	0	0	0.077	0	0	0.559	0.576
KIR2DL3	CCR8	4441235	4439852	9606.ENSP00000342215	9606.ENSP00000326432	0	0	0	0	0	0	0	0.575	0.575
EPS8	DOK1	4436418	4433599	9606.ENSP00000281172	9606.ENSP00000233668	0	0	0	0	0	0	0	0.575	0.575
TLR8	PGLYRP1	4438750	4432580	9606.ENSP00000312082	9606.ENSP00000008938	0	0	0	0	0.131	0	0	0.53	0.574
GSTM4	MAP1B	4443403	4437332	9606.ENSP00000358851	9606.ENSP00000296755	0	0	0	0	0	0	0	0.574	0.574
STRC	TRIOBP	4448181	4447103	9606.ENSP00000401513	9606.ENSP00000384312	0	0	0	0	0	0	0	0.574	0.574
SMAD7	EGR1	4435020	4433758	9606.ENSP00000262158	9606.ENSP00000239938	0	0	0	0	0	0.086	0	0.554	0.574
GIPR	RETN	4450851	4433169	9606.ENSP00000467494	9606.ENSP00000221515	0	0	0	0	0	0	0	0.572	0.573
TRIOBP	CDH23	4447103	4446856	9606.ENSP00000384312	9606.ENSP00000381768	0	0	0	0	0	0	0	0.572	0.572
WT1	DEPDC7	4440250	4433792	9606.ENSP00000331327	9606.ENSP00000241051	0	0	0	0	0	0	0	0.572	0.572
CISH	LEPR	4448513	4440182	9606.ENSP00000409346	9606.ENSP00000330393	0	0	0	0	0	0.281	0	0.43	0.572
CD163	CXCL8	4442211	4438229	9606.ENSP00000352071	9606.ENSP00000306512	0	0	0	0	0	0	0	0.571	0.571
CADM2	ZNF608	4447086	4438353	9606.ENSP00000384193	9606.ENSP00000307746	0	0	0	0	0	0	0	0.571	0.571
TLR8	LILRB3	4438750	4433941	9606.ENSP00000312082	9606.ENSP00000245620	0	0	0	0	0.402	0	0	0.312	0.571
TMEM200A	BACE2	4446018	4440415	9606.ENSP00000376224	9606.ENSP00000332979	0	0	0	0	0	0	0	0.571	0.571
FCGR1A	CSF2	4443273	4437349	9606.ENSP00000358165	9606.ENSP00000296871	0	0	0	0	0	0	0	0.57	0.57
CXCR4	ANGPTL4	4447439	4437761	9606.ENSP00000386884	9606.ENSP00000301455	0	0	0	0	0	0	0	0.57	0.57
RNASE1	C1QC	4446755	4444427	9606.ENSP00000381057	9606.ENSP00000363770	0	0	0	0	0.563	0	0	0.056	0.569
VSTM2B	SEZ6L	4440629	4434073	9606.ENSP00000335038	9606.ENSP00000248933	0	0	0	0	0.353	0	0	0.359	0.568
TNF	EGR1	4448041	4433758	9606.ENSP00000398698	9606.ENSP00000239938	0	0	0	0	0.062	0.084	0	0.537	0.568
PRICKLE1	FZD2	4441486	4439648	9606.ENSP00000345064	9606.ENSP00000323901	0	0	0	0	0.057	0.157	0	0.5	0.568
AREG	CXCL8	4446446	4438229	9606.ENSP00000379097	9606.ENSP00000306512	0	0	0	0	0.183	0	0	0.491	0.566
TBX1	GLI1	4440299	4433423	9606.ENSP00000331791	9606.ENSP00000228682	0	0	0	0	0	0.063	0	0.555	0.566
ACOT11	DLC1	4443721	4436217	9606.ENSP00000360366	9606.ENSP00000276297	0	0	0	0	0	0	0	0.565	0.565
HP	DLC1	4441808	4436217	9606.ENSP00000348170	9606.ENSP00000276297	0	0	0	0	0	0	0	0.565	0.565
C9orf139	FAM189A1	4439177	4434848	9606.ENSP00000318119	9606.ENSP00000261275	0	0	0	0	0	0	0	0.565	0.565
FZD5	VANGL1	4442500	4441743	9606.ENSP00000354607	9606.ENSP00000347672	0	0	0	0	0.063	0.185	0	0.476	0.565
HSPG2	COL6A2	4444439	4437672	9606.ENSP00000363827	9606.ENSP00000300527	0	0	0	0	0.202	0.157	0	0.405	0.565
ITGB2	CCR2	4446737	4436955	9606.ENSP00000380948	9606.ENSP00000292301	0	0	0	0	0.36	0	0	0.348	0.565
DYSF	ENSG00000204176	4447438	4444370	9606.ENSP00000386881	9606.ENSP00000363441	0	0	0	0	0.062	0	0	0.554	0.564
CNR1	EGR1	4443334	4433758	9606.ENSP00000358513	9606.ENSP00000239938	0	0	0	0	0	0.05	0	0.559	0.563
NRG1	EGR1	4447144	4433758	9606.ENSP00000384620	9606.ENSP00000239938	0	0	0	0	0	0	0	0.563	0.563
TOP2A	PRKCG	4448614	4435262	9606.ENSP00000411532	9606.ENSP00000263431	0	0	0	0	0	0.563	0	0	0.563
C1QC	SLAMF8	4444427	4436821	9606.ENSP00000363770	9606.ENSP00000289707	0	0	0	0	0.562	0	0	0	0.562
COL4A2	LAMA5	4442382	4434270	9606.ENSP00000353654	9606.ENSP00000252999	0	0	0	0	0.136	0	0	0.514	0.562
ATF3	EGR2	4441415	4433822	9606.ENSP00000344352	9606.ENSP00000242480	0	0	0	0	0.176	0.073	0	0.473	0.562
CCDC114	RSPH3	4439204	4434243	9606.ENSP00000318429	9606.ENSP00000252655	0	0	0	0	0.166	0	0	0.497	0.562
HEY1	WT1	4440859	4440250	9606.ENSP00000338272	9606.ENSP00000331327	0	0	0	0	0	0.068	0	0.548	0.562
RYR1	ANK1	4442273	4435633	9606.ENSP00000352608	9606.ENSP00000265709	0	0	0	0	0.098	0.379	0	0.279	0.561
IFT140	NPHP1	4448388	4438844	9606.ENSP00000406012	9606.ENSP00000313169	0	0	0	0	0.065	0	0	0.549	0.561
CXCR4	TBX1	4447439	4440299	9606.ENSP00000386884	9606.ENSP00000331791	0	0	0	0	0	0.05	0	0.557	0.561
COL4A4	LAMA5	4446575	4434270	9606.ENSP00000379866	9606.ENSP00000252999	0	0	0	0	0.064	0	0	0.55	0.56
GNAL	CNGB1	4440520	4434151	9606.ENSP00000334051	9606.ENSP00000251102	0	0	0	0	0.062	0.266	0	0.412	0.56
C1S	NETO1	4447198	4438838	9606.ENSP00000385035	9606.ENSP00000313088	0	0	0	0	0	0	0	0.559	0.559
RAPGEF3	PDE4D	4447902	4441530	9606.ENSP00000395708	9606.ENSP00000345502	0	0	0	0	0	0	0	0.559	0.559
ARHGEF28	ARHGEF10	4450010	4441030	9606.ENSP00000441913	9606.ENSP00000340297	0	0	0	0	0.061	0	0	0.55	0.559
MAP7	MAP1B	4451663	4437332	9606.ENSP00000482335	9606.ENSP00000296755	0	0	0	0	0	0	0	0.558	0.558
C1S	CD163	4447198	4442211	9606.ENSP00000385035	9606.ENSP00000352071	0	0	0	0	0.08	0	0	0.539	0.558
NEFL	MAP1B	4451641	4437332	9606.ENSP00000482169	9606.ENSP00000296755	0	0	0	0	0.193	0	0	0.475	0.558
WDR62	CNTLN	4447163	4445430	9606.ENSP00000384792	9606.ENSP00000370021	0	0	0	0	0	0	0	0.558	0.558
ENTPD2	TRPM5	4441701	4432664	9606.ENSP00000347213	9606.ENSP00000155858	0	0	0	0	0	0	0	0.558	0.558
TNFAIP3	CXCL1	4451592	4446449	9606.ENSP00000481570	9606.ENSP00000379110	0	0	0	0	0.266	0	0	0.421	0.557
EPN3	KCTD3	4435856	4434679	9606.ENSP00000268933	9606.ENSP00000259154	0	0	0	0	0.064	0.547	0	0	0.557
TOP2A	CCNE1	4448614	4435118	9606.ENSP00000411532	9606.ENSP00000262643	0	0	0	0	0.231	0.05	0	0.442	0.557
ALG1L2	CCDC180	4451427	4449721	9606.ENSP00000479850	9606.ENSP00000434727	0	0	0	0	0	0	0	0.557	0.557
DYSF	SYT17	4447438	4441730	9606.ENSP00000386881	9606.ENSP00000347538	0	0	0	0	0.062	0	0	0.547	0.557
COL4A4	HSPG2	4446575	4444439	9606.ENSP00000379866	9606.ENSP00000363827	0	0	0	0	0.113	0.157	0	0.453	0.556
CXCL1	TLR8	4446449	4438750	9606.ENSP00000379110	9606.ENSP00000312082	0	0	0	0	0.093	0	0	0.53	0.555
TNFAIP3	PRDM1	4451592	4443256	9606.ENSP00000481570	9606.ENSP00000358092	0	0	0	0	0.098	0	0	0.527	0.555
RIMBP3	FAM160A1	4451767	4448684	9606.ENSP00000483386	9606.ENSP00000413196	0	0	0	0	0	0	0	0.554	0.554
HP	CXCL8	4441808	4438229	9606.ENSP00000348170	9606.ENSP00000306512	0	0	0	0	0	0	0	0.553	0.553
MARCO	TLR8	4439239	4438750	9606.ENSP00000318916	9606.ENSP00000312082	0	0	0	0	0.343	0	0	0.348	0.553
CXCL2	TRPM2	4449392	4446749	9606.ENSP00000427279	9606.ENSP00000381023	0	0	0	0	0	0	0	0.553	0.553
N6AMT1	FTCD	4437981	4436927	9606.ENSP00000303584	9606.ENSP00000291670	0.157	0	0	0	0.063	0	0	0.478	0.552
COCH	COL11A2	4446573	4444442	9606.ENSP00000379862	9606.ENSP00000363840	0	0	0	0	0.061	0	0	0.543	0.552
ATF3	SOCS3	4441415	4440175	9606.ENSP00000344352	9606.ENSP00000330341	0	0	0	0	0.278	0	0	0.404	0.552
LILRA6	LILRB3	4446536	4433941	9606.ENSP00000379651	9606.ENSP00000245620	0	0	0	0.983	0.102	0.517	0	0.63	0.552
FZD2	CELSR1	4439648	4435131	9606.ENSP00000323901	9606.ENSP00000262738	0	0	0	0	0.095	0.161	0	0.456	0.551
CSF2	HGF	4437349	4433227	9606.ENSP00000296871	9606.ENSP00000222390	0	0	0	0	0	0	0	0.551	0.551
CXCR4	TLR7	4447439	4445433	9606.ENSP00000386884	9606.ENSP00000370034	0	0	0	0	0.086	0	0	0.529	0.551
BAHCC1	HDAC2	4450662	4449546	9606.ENSP00000462154	9606.ENSP00000430432	0	0	0	0	0.061	0	0.54	0	0.549
CXCL2	HGF	4449392	4433227	9606.ENSP00000427279	9606.ENSP00000222390	0	0	0	0	0.065	0	0	0.537	0.549
DYSF	SSPN	4447438	4433829	9606.ENSP00000386881	9606.ENSP00000242729	0	0	0	0	0.063	0	0	0.538	0.549
EDN2	PRMT9	4443976	4438928	9606.ENSP00000361668	9606.ENSP00000314396	0	0	0	0	0	0	0	0.548	0.548
COCH	TECTA	4446573	4446075	9606.ENSP00000379862	9606.ENSP00000376543	0	0	0	0	0	0	0	0.548	0.548
CD200	BTLA	4449108	4440498	9606.ENSP00000420298	9606.ENSP00000333919	0	0	0	0	0.063	0	0	0.537	0.547
NRARP	NKD1	4441884	4435823	9606.ENSP00000349041	9606.ENSP00000268459	0	0	0	0	0.061	0	0	0.538	0.547
KCNJ4	RTKN	4438228	4436029	9606.ENSP00000306497	9606.ENSP00000272430	0	0	0	0	0.065	0	0	0.535	0.547
PACSIN1	SPTBN4	4451827	4435249	9606.ENSP00000484060	9606.ENSP00000263373	0	0	0	0	0.313	0	0	0.366	0.546
DLG5	IL23R	4443928	4439435	9606.ENSP00000361467	9606.ENSP00000321345	0	0	0	0	0	0	0	0.546	0.546
C9orf9	AK8	4437500	4437499	9606.ENSP00000298546	9606.ENSP00000298545	0	0	0	0	0.064	0	0	0.535	0.546
UBXN10	IFT80	4444503	4438823	9606.ENSP00000364240	9606.ENSP00000312778	0	0	0	0	0	0.332	0	0.347	0.545
TLR7	CLEC9A	4445433	4441795	9606.ENSP00000370034	9606.ENSP00000348074	0	0	0	0	0.081	0.06	0	0.516	0.545
CXCL8	CCND1	4438229	4433391	9606.ENSP00000306512	9606.ENSP00000227507	0	0	0	0	0	0	0	0.544	0.544
CDH23	COCH	4446856	4446573	9606.ENSP00000381768	9606.ENSP00000379862	0	0	0	0	0	0	0	0.543	0.543
PGF	TNF	4450339	4448041	9606.ENSP00000451040	9606.ENSP00000398698	0	0	0	0	0	0	0	0.543	0.543
MUC5B	FAM155B	4449799	4434222	9606.ENSP00000436812	9606.ENSP00000252338	0	0	0	0	0	0	0	0.543	0.543
CXCL1	TLR10	4446449	4438459	9606.ENSP00000379110	9606.ENSP00000308925	0	0	0	0	0.051	0	0	0.539	0.543
C1S	SERPINC1	4447198	4442941	9606.ENSP00000385035	9606.ENSP00000356671	0	0	0	0	0.085	0.129	0	0.473	0.543
NR4A2	EGR2	4441430	4433822	9606.ENSP00000344479	9606.ENSP00000242480	0	0	0	0	0.182	0.063	0	0.452	0.543
BNC2	MYO15A	4445434	4432816	9606.ENSP00000370047	9606.ENSP00000205890	0	0	0	0	0	0	0	0.542	0.542
LLGL2	SPINT1	4446039	4441220	9606.ENSP00000376333	9606.ENSP00000342098	0	0	0	0	0.164	0	0	0.473	0.541
NR4A2	ATF3	4441430	4441415	9606.ENSP00000344479	9606.ENSP00000344352	0	0	0	0	0.196	0	0	0.452	0.541
AREG	WT1	4446446	4440250	9606.ENSP00000379097	9606.ENSP00000331327	0	0	0	0	0	0.379	0	0.292	0.541
AGAP5	MMRN2	4444318	4443867	9606.ENSP00000363207	9606.ENSP00000361097	0	0	0	0	0	0	0	0.541	0.541
TLR10	PGLYRP1	4438459	4432580	9606.ENSP00000308925	9606.ENSP00000008938	0	0	0	0	0	0	0	0.54	0.54
TNF	ADAMTS5	4448041	4436610	9606.ENSP00000398698	9606.ENSP00000284987	0	0	0	0	0	0.159	0	0.475	0.54
PDE4D	CACNG6	4441530	4434250	9606.ENSP00000345502	9606.ENSP00000252729	0	0	0	0	0	0	0.54	0	0.54
TNFAIP3	TNFSF10	4451592	4433796	9606.ENSP00000481570	9606.ENSP00000241261	0	0	0	0	0.076	0.354	0	0.291	0.539
SLC4A8	INHBE	4448378	4435717	9606.ENSP00000405812	9606.ENSP00000266646	0	0	0	0	0	0	0	0.539	0.539
ZNF471	SUSD5	4438480	4438441	9606.ENSP00000309161	9606.ENSP00000308727	0	0	0	0	0	0	0	0.539	0.539
TTN	CAPN14	4450840	4447215	9606.ENSP00000467141	9606.ENSP00000385247	0	0	0	0	0	0.083	0	0.517	0.538
CEND1	CYP2W1	4440012	4438563	9606.ENSP00000328336	9606.ENSP00000310149	0	0	0	0	0	0	0	0.537	0.537
TSHR	GNA11	4449981	4432654	9606.ENSP00000441235	9606.ENSP00000078429	0	0	0	0	0	0.32	0	0.348	0.537
PEG10	ZNF451	4448998	4443605	9606.ENSP00000418944	9606.ENSP00000359740	0	0	0	0	0	0	0	0.537	0.537
ZFYVE27	ATP5B	4446174	4434993	9606.ENSP00000377282	9606.ENSP00000262030	0	0	0	0	0	0.537	0	0	0.537
CDH23	ANK1	4446856	4435633	9606.ENSP00000381768	9606.ENSP00000265709	0	0	0	0	0.061	0.052	0	0.52	0.535
GPER1	RAMP3	4446636	4433813	9606.ENSP00000380281	9606.ENSP00000242249	0	0	0	0	0	0	0	0.535	0.535
ARHGEF39	PLEKHG7	4445045	4441476	9606.ENSP00000367638	9606.ENSP00000344961	0	0	0	0	0	0	0	0.534	0.534
COL6A2	AEBP1	4437672	4433280	9606.ENSP00000300527	9606.ENSP00000223357	0	0	0	0	0.336	0	0	0.326	0.534
UPB1	HPD	4439682	4436793	9606.ENSP00000324343	9606.ENSP00000289004	0	0	0	0	0.123	0	0	0.491	0.534
TNF	NLRC4	4448041	4447203	9606.ENSP00000398698	9606.ENSP00000385090	0	0	0	0	0.085	0	0	0.511	0.534
RSPH10B2	RSPH6A	4447161	4433170	9606.ENSP00000384766	9606.ENSP00000221538	0	0	0	0	0.091	0	0	0.508	0.534
CDK18	PKMYT1	4449260	4435050	9606.ENSP00000423665	9606.ENSP00000262300	0	0	0.315	0.569	0.064	0.38	0	0.315	0.534
HP	CYGB	4441808	4437001	9606.ENSP00000348170	9606.ENSP00000293230	0	0	0	0	0	0.127	0	0.487	0.533
CLEC9A	TLR8	4441795	4438750	9606.ENSP00000348074	9606.ENSP00000312082	0	0	0	0	0.181	0.06	0	0.443	0.533
EPN3	EHD2	4435856	4435232	9606.ENSP00000268933	9606.ENSP00000263277	0	0	0	0	0.064	0.416	0	0.214	0.533
CTH	AZIN2	4443637	4437080	9606.ENSP00000359976	9606.ENSP00000294517	0.184	0	0	0	0.061	0	0	0.438	0.532
NRG1	EGR2	4447144	4433822	9606.ENSP00000384620	9606.ENSP00000242480	0	0	0	0	0	0	0	0.532	0.532
CYFIP1	FER	4451554	4436411	9606.ENSP00000481038	9606.ENSP00000281092	0	0	0	0	0	0.053	0	0.526	0.531
HCRTR1	CNR1	4447115	4443334	9606.ENSP00000384387	9606.ENSP00000358513	0	0	0	0.569	0.061	0.379	0	0.551	0.531
XRCC3	FANCA	4450379	4445843	9606.ENSP00000451974	9606.ENSP00000373952	0	0	0	0	0.076	0.13	0	0.462	0.53
TLR5	PGLYRP1	4449957	4432580	9606.ENSP00000440643	9606.ENSP00000008938	0	0	0	0	0	0	0	0.53	0.53
NFE2	FECH	4449893	4445732	9606.ENSP00000439120	9606.ENSP00000372326	0	0	0	0	0	0	0	0.53	0.53
CXCR4	MCAM	4447439	4435364	9606.ENSP00000386884	9606.ENSP00000264036	0	0	0	0	0	0	0	0.53	0.53
CXCR2	CSF2	4439296	4437349	9606.ENSP00000319635	9606.ENSP00000296871	0	0	0	0	0	0	0	0.53	0.53
IGF2	INSRR	4447717	4443062	9606.ENSP00000391826	9606.ENSP00000357178	0	0	0	0	0	0.262	0	0.389	0.529
C1QC	FCGR1A	4444427	4443273	9606.ENSP00000363770	9606.ENSP00000358165	0	0	0	0	0.389	0	0	0.26	0.529
KCNA6	DEPDC7	4436389	4433792	9606.ENSP00000280684	9606.ENSP00000241051	0	0	0	0	0	0	0	0.529	0.529
ENC1	ARHGEF28	4451356	4450010	9606.ENSP00000479101	9606.ENSP00000441913	0	0	0	0	0.061	0	0	0.518	0.528
NR4A3	EGR1	4451630	4433758	9606.ENSP00000482027	9606.ENSP00000239938	0	0	0	0	0.091	0.063	0	0.49	0.528
ULBP2	KIR2DL3	4442864	4441235	9606.ENSP00000356320	9606.ENSP00000342215	0	0	0	0	0	0	0	0.527	0.527
TLR8	CEACAM4	4438750	4433190	9606.ENSP00000312082	9606.ENSP00000221954	0	0	0	0	0.525	0	0	0.046	0.527
RNASE1	ALPL	4446755	4444459	9606.ENSP00000381057	9606.ENSP00000363973	0	0	0	0	0	0	0	0.527	0.527
ENSG00000204176	SV2A	4444370	4443265	9606.ENSP00000363441	9606.ENSP00000358142	0	0	0	0	0	0.076	0	0.51	0.527
CISH	OSM	4448513	4432875	9606.ENSP00000409346	9606.ENSP00000215781	0	0	0	0	0.097	0	0	0.497	0.526
TLR5	CCR2	4449957	4436955	9606.ENSP00000440643	9606.ENSP00000292301	0	0	0	0	0.07	0	0	0.511	0.526
TNF	CR1	4448041	4442796	9606.ENSP00000398698	9606.ENSP00000356016	0	0	0	0	0.078	0.185	0	0.417	0.524
GDF10	CREB5	4450731	4442040	9606.ENSP00000464145	9606.ENSP00000350359	0	0	0	0	0	0	0	0.524	0.524
CXCL8	TNFSF10	4438229	4433796	9606.ENSP00000306512	9606.ENSP00000241261	0	0	0	0	0.069	0	0	0.51	0.524
DACH1	CXCL8	4451650	4438229	9606.ENSP00000482245	9606.ENSP00000306512	0	0	0	0	0	0	0	0.524	0.524
RNASE1	CCND1	4446755	4433391	9606.ENSP00000381057	9606.ENSP00000227507	0	0	0	0	0	0	0	0.523	0.523
RAI14	FAM129B	4449387	4444158	9606.ENSP00000427123	9606.ENSP00000362409	0	0	0	0	0.103	0	0	0.49	0.523
MEGF11	CCNE1	4447444	4435118	9606.ENSP00000386908	9606.ENSP00000262643	0	0	0	0	0	0	0	0.522	0.522
TRIOBP	CD163	4447103	4442211	9606.ENSP00000384312	9606.ENSP00000352071	0	0	0	0	0	0.522	0	0	0.522
RAI14	CD163	4449387	4442211	9606.ENSP00000427123	9606.ENSP00000352071	0	0	0	0	0	0.522	0	0	0.522
SNX22	CLNK	4439605	4433380	9606.ENSP00000323435	9606.ENSP00000226951	0	0	0	0	0.055	0	0	0.515	0.522
CD163	CD180	4442211	4434486	9606.ENSP00000352071	9606.ENSP00000256447	0	0	0	0	0.102	0	0	0.49	0.522
KIRREL3	MAP1B	4449750	4437332	9606.ENSP00000435466	9606.ENSP00000296755	0	0	0	0	0.106	0.305	0	0.291	0.521
CXCL2	SOCS3	4449392	4440175	9606.ENSP00000427279	9606.ENSP00000330341	0	0	0	0	0.2	0	0	0.425	0.521
STRC	COL11A2	4448181	4444442	9606.ENSP00000401513	9606.ENSP00000363840	0	0	0	0	0	0	0	0.521	0.521
ADRB1	GNA11	4443292	4432654	9606.ENSP00000358301	9606.ENSP00000078429	0	0	0	0	0	0.177	0	0.441	0.52
SYBU	KIF5C	4448441	4447796	9606.ENSP00000407118	9606.ENSP00000393379	0	0	0	0	0.108	0	0	0.484	0.52
CXCL1	SOCS3	4446449	4440175	9606.ENSP00000379110	9606.ENSP00000330341	0	0	0	0	0.198	0	0	0.426	0.52
MAPT	EGR1	4441081	4433758	9606.ENSP00000340820	9606.ENSP00000239938	0	0	0	0	0	0	0	0.52	0.52
KLHL34	MYLK4	4445224	4436151	9606.ENSP00000368813	9606.ENSP00000274643	0	0	0	0	0.52	0	0	0	0.52
YES1	EPS8	4450671	4436418	9606.ENSP00000462468	9606.ENSP00000281172	0	0	0	0	0.059	0.104	0	0.476	0.519
MCAM	CHL1	4435364	4434493	9606.ENSP00000264036	9606.ENSP00000256509	0	0	0	0	0.061	0	0	0.509	0.519
TNF	LEPR	4448041	4440182	9606.ENSP00000398698	9606.ENSP00000330393	0	0	0	0	0	0	0	0.519	0.519
TTN	MUC16	4450840	4446747	9606.ENSP00000467141	9606.ENSP00000381008	0	0	0	0	0	0	0	0.518	0.518
HEY1	NKD1	4440859	4435823	9606.ENSP00000338272	9606.ENSP00000268459	0	0	0	0	0.062	0	0	0.508	0.518
SV2A	SYT17	4443265	4441730	9606.ENSP00000358142	9606.ENSP00000347538	0	0	0	0	0	0.076	0	0.5	0.518
CXCL2	TLR8	4449392	4438750	9606.ENSP00000427279	9606.ENSP00000312082	0	0	0	0	0.093	0	0	0.491	0.518
TBX1	CXCL8	4440299	4438229	9606.ENSP00000331791	9606.ENSP00000306512	0	0	0	0	0	0	0	0.517	0.517
NXN	C9orf9	4440789	4437500	9606.ENSP00000337443	9606.ENSP00000298546	0	0	0	0	0	0.516	0	0	0.516
TNF	SERPINC1	4448041	4442941	9606.ENSP00000398698	9606.ENSP00000356671	0	0	0	0	0	0	0	0.516	0.516
CACNA2D2	RYR1	4448948	4442273	9606.ENSP00000418081	9606.ENSP00000352608	0	0	0	0	0.097	0	0.36	0.231	0.516
ADAMTS13	AK8	4443840	4437499	9606.ENSP00000360997	9606.ENSP00000298545	0	0	0	0	0.065	0	0	0.504	0.516
KLHL34	BEST3	4445224	4440356	9606.ENSP00000368813	9606.ENSP00000332413	0	0	0	0	0.511	0	0	0.05	0.515
CYP2W1	CHADL	4438563	4432934	9606.ENSP00000310149	9606.ENSP00000216241	0	0	0	0	0	0	0	0.515	0.515
HSPG2	COL6A3	4444439	4437161	9606.ENSP00000363827	9606.ENSP00000295550	0	0	0	0	0.119	0.157	0	0.398	0.514
PLK2	PKMYT1	4436123	4435050	9606.ENSP00000274289	9606.ENSP00000262300	0	0	0	0.579	0.099	0.378	0	0.426	0.514
NR4A2	SIK1	4441430	4435928	9606.ENSP00000344479	9606.ENSP00000270162	0	0	0	0	0.325	0	0	0.31	0.514
SCN8A	PRICKLE1	4441631	4441486	9606.ENSP00000346534	9606.ENSP00000345064	0	0	0	0	0.061	0.064	0	0.491	0.513
LRRN1	LRRC3	4438958	4436925	9606.ENSP00000314901	9606.ENSP00000291592	0	0	0	0	0	0	0	0.513	0.513
PPARA	SCARB2	4447242	4435511	9606.ENSP00000385523	9606.ENSP00000264896	0	0	0	0	0.055	0	0	0.506	0.513
CADM2	SRPK3	4447086	4443458	9606.ENSP00000384193	9606.ENSP00000359119	0	0	0	0	0	0	0	0.513	0.513
NOP16	AKAP6	4451531	4436401	9606.ENSP00000480832	9606.ENSP00000280979	0	0	0	0	0	0	0	0.513	0.513
MXRA7	CYGB	4441790	4437001	9606.ENSP00000348050	9606.ENSP00000293230	0	0	0	0	0.076	0	0	0.493	0.512
WT1	EGR1	4440250	4433758	9606.ENSP00000331327	9606.ENSP00000239938	0	0	0	0.629	0.061	0.379	0	0.555	0.512
LMNA	CSF2	4443076	4437349	9606.ENSP00000357283	9606.ENSP00000296871	0	0	0	0	0	0	0	0.512	0.512
SSTR3	GIPR	4451544	4450851	9606.ENSP00000480971	9606.ENSP00000467494	0	0	0	0	0.059	0	0	0.503	0.512
SLC4A8	SLC1A3	4448378	4435561	9606.ENSP00000405812	9606.ENSP00000265113	0	0	0	0	0	0	0	0.512	0.512
SOCS3	TNFSF10	4440175	4433796	9606.ENSP00000330341	9606.ENSP00000241261	0	0	0	0	0	0.379	0	0.245	0.511
GCSAML	C9orf64	4450199	4444714	9606.ENSP00000446460	9606.ENSP00000365522	0	0	0	0	0	0	0	0.511	0.511
TLR10	CCR2	4438459	4436955	9606.ENSP00000308925	9606.ENSP00000292301	0	0	0	0	0.085	0	0	0.488	0.511
GIPR	ZNF608	4450851	4438353	9606.ENSP00000467494	9606.ENSP00000307746	0	0	0	0	0	0	0	0.511	0.511
PPP1R9A	NDN	4448365	4440378	9606.ENSP00000405514	9606.ENSP00000332643	0	0	0	0	0.062	0	0	0.5	0.511
TMEM132D	MEGF11	4448491	4447444	9606.ENSP00000408581	9606.ENSP00000386908	0	0	0	0	0.076	0	0	0.492	0.51
SH2D2A	OSGEP	4446004	4432822	9606.ENSP00000376123	9606.ENSP00000206542	0	0	0	0	0	0	0	0.51	0.51
IQCA1	C9orf64	4448445	4444714	9606.ENSP00000407213	9606.ENSP00000365522	0	0	0	0	0	0	0	0.51	0.51
DYSF	FLNC	4447438	4439901	9606.ENSP00000386881	9606.ENSP00000327145	0	0	0	0	0.064	0.084	0	0.473	0.509
RYR1	AKAP6	4442273	4436401	9606.ENSP00000352608	9606.ENSP00000280979	0	0	0	0	0.061	0.261	0	0.349	0.509
FCGR1A	MSR1	4443273	4435004	9606.ENSP00000358165	9606.ENSP00000262101	0	0	0	0	0.262	0	0	0.362	0.509
CXCL2	TLR10	4449392	4438459	9606.ENSP00000427279	9606.ENSP00000308925	0	0	0	0	0.051	0	0	0.504	0.509
CSF2	SMAD7	4437349	4435020	9606.ENSP00000296871	9606.ENSP00000262158	0	0	0	0	0	0	0	0.508	0.508
CYFIP1	EPHA2	4451554	4442119	9606.ENSP00000481038	9606.ENSP00000351209	0	0	0	0	0.077	0.053	0	0.482	0.508
PACSIN1	SNX22	4451827	4439605	9606.ENSP00000484060	9606.ENSP00000323435	0	0	0	0	0	0	0	0.508	0.508
TNFSF15	TLR8	4444313	4438750	9606.ENSP00000363157	9606.ENSP00000312082	0	0	0	0	0	0	0	0.507	0.507
TMEM8B	EGR1	4444986	4433758	9606.ENSP00000367227	9606.ENSP00000239938	0	0	0	0	0	0	0	0.507	0.507
WNT5B	NKD1	4446654	4435823	9606.ENSP00000380379	9606.ENSP00000268459	0	0	0	0	0.059	0.129	0	0.445	0.506
CHST13	HS3ST1	4439128	4432550	9606.ENSP00000317404	9606.ENSP00000002596	0	0	0	0	0	0	0	0.506	0.506
HDAC2	PRDM1	4449546	4443256	9606.ENSP00000430432	9606.ENSP00000358092	0	0	0	0	0	0.379	0	0.238	0.506
CD163	MSR1	4442211	4435004	9606.ENSP00000352071	9606.ENSP00000262101	0	0	0	0.642	0.333	0	0	0.73	0.505
CXCR2	TLR8	4439296	4438750	9606.ENSP00000319635	9606.ENSP00000312082	0	0	0	0	0.182	0	0	0.42	0.505
NR4A3	CCND1	4451630	4433391	9606.ENSP00000482027	9606.ENSP00000227507	0	0	0	0	0	0	0	0.505	0.505
PGF	PTGFRN	4450339	4446120	9606.ENSP00000451040	9606.ENSP00000376899	0	0	0	0	0	0	0	0.504	0.504
TNF	BTLA	4448041	4440498	9606.ENSP00000398698	9606.ENSP00000333919	0	0	0	0	0.098	0	0	0.473	0.504
CXCR4	TLR8	4447439	4438750	9606.ENSP00000386884	9606.ENSP00000312082	0	0	0	0	0.099	0	0	0.473	0.504
ZFYVE27	TECPR2	4446174	4442257	9606.ENSP00000377282	9606.ENSP00000352510	0	0	0	0	0	0	0	0.504	0.504
DYSF	RYR1	4447438	4442273	9606.ENSP00000386881	9606.ENSP00000352608	0	0	0	0	0.097	0	0	0.473	0.503
FFAR1	TRPM5	4433988	4432664	9606.ENSP00000246553	9606.ENSP00000155858	0	0	0	0	0.078	0	0	0.483	0.503
CASP5	TLR8	4446112	4438750	9606.ENSP00000376849	9606.ENSP00000312082	0	0	0	0	0.335	0.08	0	0.254	0.503
SIK1	CREM	4435928	4435595	9606.ENSP00000270162	9606.ENSP00000265372	0	0	0	0	0.061	0	0	0.493	0.503
MTCL1	ATP7B	4442301	4433836	9606.ENSP00000352927	9606.ENSP00000242839	0	0	0	0	0	0	0	0.502	0.502
SEMA5A	LPAR1	4445698	4444391	9606.ENSP00000371936	9606.ENSP00000363553	0	0	0	0	0.073	0	0	0.485	0.502
ITGA7	RYR1	4450383	4442273	9606.ENSP00000452120	9606.ENSP00000352608	0	0	0	0	0.109	0	0	0.464	0.502
SLC12A8	ZNF277	4446154	4442478	9606.ENSP00000377112	9606.ENSP00000354501	0	0	0	0	0	0	0	0.502	0.502
PRICKLE1	NKD1	4441486	4435823	9606.ENSP00000345064	9606.ENSP00000268459	0	0	0	0	0.063	0	0	0.49	0.501
XKRX	KCNJ4	4444063	4438228	9606.ENSP00000362047	9606.ENSP00000306497	0	0	0	0	0	0	0	0.501	0.501
KIF19	CLIP4	4445896	4439891	9606.ENSP00000374566	9606.ENSP00000327009	0	0	0	0	0.062	0.262	0	0.338	0.501
SV2A	STX1A	4443265	4433256	9606.ENSP00000358142	9606.ENSP00000222812	0	0	0	0	0.088	0	0	0.475	0.501
IGF2	NDN	4447717	4440378	9606.ENSP00000391826	9606.ENSP00000332643	0	0	0	0	0.076	0	0	0.482	0.501
PLK2	MAST1	4436123	4434175	9606.ENSP00000274289	9606.ENSP00000251472	0	0	0	0.57	0.174	0.359	0	0.254	0.5
GPD2	MAPK8IP1	4438431	4433790	9606.ENSP00000308610	9606.ENSP00000241014	0	0	0	0	0	0	0	0.5	0.5
SLC13A5	NDN	4448406	4440378	9606.ENSP00000406220	9606.ENSP00000332643	0	0	0	0	0	0	0	0.5	0.5
FAT2	ZNF331	4434953	4434288	9606.ENSP00000261800	9606.ENSP00000253144	0	0	0	0	0	0.05	0	0.495	0.499
TNF	TNFRSF10C	4448041	4441913	9606.ENSP00000398698	9606.ENSP00000349324	0	0	0	0	0	0	0	0.499	0.499
ENAM	PNOC	4446500	4437808	9606.ENSP00000379383	9606.ENSP00000301908	0	0	0	0	0	0	0	0.499	0.499
PPARA	LEPR	4447242	4440182	9606.ENSP00000385523	9606.ENSP00000330393	0	0	0	0	0	0	0	0.499	0.499
MTUS2	SRPK3	4451803	4443458	9606.ENSP00000483729	9606.ENSP00000359119	0	0	0	0	0	0	0	0.5	0.499
PTTG1	CCNE1	4446209	4435118	9606.ENSP00000377536	9606.ENSP00000262643	0	0	0	0	0.198	0	0	0.399	0.498
KLHL29	LRRC66	4449135	4441202	9606.ENSP00000420659	9606.ENSP00000341944	0	0	0	0	0	0.053	0	0.492	0.498
MAPT	MAPK8IP1	4441081	4433790	9606.ENSP00000340820	9606.ENSP00000241014	0	0	0	0	0.151	0	0	0.432	0.498
DACH1	MACROD2	4451650	4433008	9606.ENSP00000482245	9606.ENSP00000217246	0	0	0	0	0	0	0	0.498	0.498
WT1	MN1	4440250	4438094	9606.ENSP00000331327	9606.ENSP00000304956	0	0	0	0	0	0	0	0.497	0.497
MUC5B	TNF	4449799	4448041	9606.ENSP00000436812	9606.ENSP00000398698	0	0	0	0	0	0.261	0	0.348	0.497
HP	SCARB2	4441808	4435511	9606.ENSP00000348170	9606.ENSP00000264896	0	0	0	0	0.061	0	0	0.487	0.497
TNFAIP3	TLR7	4451592	4445433	9606.ENSP00000481570	9606.ENSP00000370034	0	0	0	0	0.085	0	0	0.473	0.497
DPF3	OTUB2	4451397	4432800	9606.ENSP00000479526	9606.ENSP00000203664	0	0	0	0	0.064	0	0	0.485	0.497
RIMBP3	ALS2CR11	4451767	4448531	9606.ENSP00000483386	9606.ENSP00000409937	0	0	0	0	0	0	0	0.496	0.496
KLHL30	RHBDL2	4447370	4436801	9606.ENSP00000386389	9606.ENSP00000289248	0	0	0	0	0	0	0	0.496	0.496
ANKEF1	PNOC	4445044	4437808	9606.ENSP00000367631	9606.ENSP00000301908	0	0	0	0	0	0	0	0.496	0.496
KIF5C	MAPT	4447796	4441081	9606.ENSP00000393379	9606.ENSP00000340820	0	0	0	0	0.2	0.181	0	0.292	0.496
PTTG1	PKMYT1	4446209	4435050	9606.ENSP00000377536	9606.ENSP00000262300	0	0	0	0	0.302	0	0	0.307	0.495
TLR7	PGLYRP1	4445433	4432580	9606.ENSP00000370034	9606.ENSP00000008938	0	0	0	0	0	0	0	0.496	0.495
MYCBPAP	RSPH3	4439584	4434243	9606.ENSP00000323184	9606.ENSP00000252655	0	0	0	0	0.112	0	0	0.455	0.495
SOCS3	IL26	4440175	4433445	9606.ENSP00000330341	9606.ENSP00000229134	0	0	0	0	0	0	0	0.494	0.494
RETN	OSM	4433169	4432875	9606.ENSP00000221515	9606.ENSP00000215781	0	0	0	0	0.309	0	0	0.299	0.494
ZBTB38	ZNF608	4449362	4438353	9606.ENSP00000426387	9606.ENSP00000307746	0	0	0	0	0	0	0	0.494	0.494
RSPH10B2	RSPH3	4447161	4434243	9606.ENSP00000384766	9606.ENSP00000252655	0	0	0	0	0.064	0	0	0.482	0.494
CEACAM4	RETN	4433190	4433169	9606.ENSP00000221954	9606.ENSP00000221515	0	0	0	0	0.493	0	0	0	0.493
TRIOBP	SPTBN5	4447103	4439152	9606.ENSP00000384312	9606.ENSP00000317790	0	0	0	0	0	0	0	0.493	0.493
PARS2	OSGEP	4443717	4432822	9606.ENSP00000360327	9606.ENSP00000206542	0.166	0	0	0	0.229	0	0	0.275	0.493
ITGB2	TLR8	4446737	4438750	9606.ENSP00000380948	9606.ENSP00000312082	0	0	0	0	0.34	0.062	0	0.247	0.493
AREG	HGF	4446446	4433227	9606.ENSP00000379097	9606.ENSP00000222390	0	0	0	0	0	0	0	0.494	0.493
FCGR1A	CXCL8	4443273	4438229	9606.ENSP00000358165	9606.ENSP00000306512	0	0	0	0	0.077	0	0	0.474	0.493
CXCL2	ATF3	4449392	4441415	9606.ENSP00000427279	9606.ENSP00000344352	0	0	0	0	0.204	0	0	0.39	0.493
MEOX1	SOX7	4439465	4437810	9606.ENSP00000321684	9606.ENSP00000301921	0	0	0	0	0.06	0.08	0	0.46	0.492
FICD	CHADL	4450200	4432934	9606.ENSP00000446479	9606.ENSP00000216241	0.042	0	0	0	0	0	0	0.492	0.492
PGF	C1S	4450339	4447198	9606.ENSP00000451040	9606.ENSP00000385035	0	0	0	0	0	0	0	0.492	0.492
HSH2D	C1S	4451698	4447198	9606.ENSP00000482604	9606.ENSP00000385035	0	0	0	0	0	0	0	0.492	0.491
BATF2	DUSP2	4437804	4436790	9606.ENSP00000301887	9606.ENSP00000288943	0	0	0	0	0.063	0.111	0	0.438	0.491
C1S	FAM155B	4447198	4434222	9606.ENSP00000385035	9606.ENSP00000252338	0	0	0	0	0	0	0	0.491	0.491
SSTR3	TNF	4451544	4448041	9606.ENSP00000480971	9606.ENSP00000398698	0	0	0	0	0	0	0	0.491	0.491
CXCL1	TBX1	4446449	4440299	9606.ENSP00000379110	9606.ENSP00000331791	0	0	0	0	0	0	0	0.491	0.491
TLR8	RETN	4438750	4433169	9606.ENSP00000312082	9606.ENSP00000221515	0	0	0	0	0.354	0	0	0.243	0.49
CISH	TLR8	4448513	4438750	9606.ENSP00000409346	9606.ENSP00000312082	0	0	0	0	0.076	0	0	0.471	0.49
MAP3K6	UBE3C	4449055	4438485	9606.ENSP00000419591	9606.ENSP00000309198	0	0	0	0	0	0	0	0.49	0.49
PLXNB1	MST1R	4442133	4437287	9606.ENSP00000351338	9606.ENSP00000296474	0	0	0	0.541	0.083	0.344	0	0.429	0.49
CCDC180	FAM179A	4449721	4445232	9606.ENSP00000434727	9606.ENSP00000368876	0	0	0	0	0.07	0	0	0.475	0.49
FHL1	FLNC	4446235	4439901	9606.ENSP00000377710	9606.ENSP00000327145	0	0	0	0	0.115	0.186	0	0.347	0.489
TLR7	MARCO	4445433	4439239	9606.ENSP00000370034	9606.ENSP00000318916	0	0	0	0	0.289	0	0	0.311	0.489
STRC	DFNB31	4448181	4442506	9606.ENSP00000401513	9606.ENSP00000354623	0	0	0	0	0	0	0	0.488	0.488
ZSCAN20	MAPK8IP1	4442599	4433790	9606.ENSP00000355053	9606.ENSP00000241014	0	0	0	0	0	0	0	0.488	0.488
KCNJ15	TRPM5	4440287	4432664	9606.ENSP00000331698	9606.ENSP00000155858	0	0	0	0	0	0	0	0.488	0.488
ZC2HC1C	THSD1	4449753	4434644	9606.ENSP00000435550	9606.ENSP00000258613	0	0	0	0	0.063	0	0	0.476	0.488
HLX	HGF	4442758	4433227	9606.ENSP00000355870	9606.ENSP00000222390	0	0	0	0	0.098	0	0	0.456	0.488
TLR7	CD163	4445433	4442211	9606.ENSP00000370034	9606.ENSP00000352071	0	0	0	0	0.117	0	0	0.444	0.488
FZD2	CCND1	4439648	4433391	9606.ENSP00000323901	9606.ENSP00000227507	0	0	0	0	0.118	0	0	0.442	0.487
NEFL	PNOC	4451641	4437808	9606.ENSP00000482169	9606.ENSP00000301908	0	0	0	0	0	0	0	0.487	0.487
TRIOBP	DFNB31	4447103	4442506	9606.ENSP00000384312	9606.ENSP00000354623	0	0	0	0	0	0	0	0.487	0.487
MYCBPAP	SH2D4A	4439584	4435649	9606.ENSP00000323184	9606.ENSP00000265807	0	0	0	0	0	0	0	0.487	0.487
TADA2A	USP51	4451560	4449244	9606.ENSP00000481091	9606.ENSP00000423333	0	0	0	0	0.064	0.4	0	0.159	0.486
MYOM1	FLNC	4441863	4439901	9606.ENSP00000348821	9606.ENSP00000327145	0	0	0	0	0.059	0.126	0	0.425	0.486
HDAC2	TOP2A	4449546	4448614	9606.ENSP00000430432	9606.ENSP00000411532	0	0	0	0	0.156	0.305	0	0.194	0.486
CHAC1	SLC7A11	4448011	4436386	9606.ENSP00000398105	9606.ENSP00000280612	0	0	0	0	0.098	0	0	0.453	0.486
NR4A2	CREM	4441430	4435595	9606.ENSP00000344479	9606.ENSP00000265372	0	0	0	0	0.062	0	0	0.474	0.485
TLR7	C1QC	4445433	4444427	9606.ENSP00000370034	9606.ENSP00000363770	0	0	0	0	0.406	0	0	0.168	0.485
TNF	IRAK2	4448041	4434487	9606.ENSP00000398698	9606.ENSP00000256458	0	0	0	0	0.088	0.05	0	0.453	0.485
TLR7	FCGR1A	4445433	4443273	9606.ENSP00000370034	9606.ENSP00000358165	0	0	0	0	0.144	0	0	0.423	0.485
CSF2	TNFSF9	4437349	4433948	9606.ENSP00000296871	9606.ENSP00000245817	0	0	0	0	0.085	0	0	0.459	0.484
TECTA	MYO15A	4446075	4432816	9606.ENSP00000376543	9606.ENSP00000205890	0	0	0	0	0.063	0.086	0	0.446	0.484
SOCS3	CSF2	4440175	4437349	9606.ENSP00000330341	9606.ENSP00000296871	0	0	0	0	0.061	0	0	0.474	0.484
RSPH10B2	RSPH9	4447161	4443891	9606.ENSP00000384766	9606.ENSP00000361238	0	0	0	0	0.111	0	0	0.444	0.484
ATF3	CXCL8	4441415	4438229	9606.ENSP00000344352	9606.ENSP00000306512	0	0	0	0	0.101	0	0	0.449	0.483
TTN	DSC2	4450840	4436400	9606.ENSP00000467141	9606.ENSP00000280904	0	0	0	0	0	0	0	0.483	0.483
GDF10	COL6A3	4450731	4437161	9606.ENSP00000464145	9606.ENSP00000295550	0	0	0	0	0	0.08	0	0.461	0.483
TLR5	CXCR4	4449957	4447439	9606.ENSP00000440643	9606.ENSP00000386884	0	0	0	0	0.061	0	0	0.473	0.483
TLR7	SOCS3	4445433	4440175	9606.ENSP00000370034	9606.ENSP00000330341	0	0	0	0	0.062	0	0	0.472	0.483
B3GNT7	MYO15A	4436730	4432816	9606.ENSP00000287590	9606.ENSP00000205890	0	0	0	0	0	0	0	0.482	0.482
ADRB1	PDE4D	4443292	4441530	9606.ENSP00000358301	9606.ENSP00000345502	0	0	0	0	0	0.299	0	0.292	0.482
DPF3	ANKEF1	4451397	4445044	9606.ENSP00000479526	9606.ENSP00000367631	0	0	0	0	0.061	0	0	0.471	0.482
SCHIP1	IFT80	4448340	4438823	9606.ENSP00000404860	9606.ENSP00000312778	0	0	0	0	0	0	0	0.481	0.481
PANX2	TRPM5	4446462	4432664	9606.ENSP00000379183	9606.ENSP00000155858	0	0	0	0	0.077	0	0	0.461	0.481
TNF	MST1R	4448041	4437287	9606.ENSP00000398698	9606.ENSP00000296474	0	0	0	0	0	0.05	0	0.476	0.481
SCN8A	MAP1B	4441631	4437332	9606.ENSP00000346534	9606.ENSP00000296755	0	0	0	0	0.145	0.299	0	0.202	0.48
ITGB2	FCGR1A	4446737	4443273	9606.ENSP00000380948	9606.ENSP00000358165	0	0	0	0	0.355	0	0	0.226	0.48
CXCR4	ITGB2	4447439	4446737	9606.ENSP00000386884	9606.ENSP00000380948	0	0	0	0	0.162	0	0	0.405	0.48
ARHGEF28	RTKN	4450010	4436029	9606.ENSP00000441913	9606.ENSP00000272430	0	0	0	0	0.062	0.083	0	0.443	0.479
NSFL1C	SH3PXD2B	4448968	4438532	9606.ENSP00000418529	9606.ENSP00000309714	0	0	0	0	0.062	0	0	0.468	0.479
ENC1	FICD	4451356	4450200	9606.ENSP00000479101	9606.ENSP00000446479	0	0	0	0	0	0	0	0.479	0.479
CSF2	F2RL1	4437349	4437321	9606.ENSP00000296871	9606.ENSP00000296677	0	0	0	0	0	0	0	0.479	0.479
PACSIN1	NETO1	4451827	4438838	9606.ENSP00000484060	9606.ENSP00000313088	0	0	0	0	0.152	0	0	0.41	0.479
NKD1	WNT6	4435823	4433609	9606.ENSP00000268459	9606.ENSP00000233948	0	0	0	0	0	0.129	0	0.425	0.478
ADM	ADM5	4449788	4447808	9606.ENSP00000436607	9606.ENSP00000393631	0	0	0	0	0	0	0	0.477	0.477
KIF5C	CLIP4	4447796	4439891	9606.ENSP00000393379	9606.ENSP00000327009	0	0	0	0	0.063	0.185	0	0.371	0.477
HLX	KLHL14	4442758	4442241	9606.ENSP00000355870	9606.ENSP00000352314	0	0	0	0	0	0	0	0.477	0.477
FTCD	HPD	4436927	4436793	9606.ENSP00000291670	9606.ENSP00000289004	0	0	0	0	0.25	0	0	0.33	0.476
TNF	MKI67	4448041	4443142	9606.ENSP00000398698	9606.ENSP00000357643	0	0	0	0	0.059	0	0	0.466	0.476
ACSBG2	CRAT	4450779	4438964	9606.ENSP00000465589	9606.ENSP00000315013	0	0	0	0	0.443	0	0	0.099	0.476
TNFAIP3	ATF3	4451592	4441415	9606.ENSP00000481570	9606.ENSP00000344352	0	0	0	0	0.157	0	0	0.404	0.476
OPLAH	GGACT	4451491	4444698	9606.ENSP00000480476	9606.ENSP00000365426	0.22	0	0	0	0.061	0	0	0.342	0.476
PROX2	LRRC74A	4450349	4446182	9606.ENSP00000451223	9606.ENSP00000377369	0	0	0	0	0	0	0	0.476	0.476
WT1	CXCL8	4440250	4438229	9606.ENSP00000331327	9606.ENSP00000306512	0	0	0	0	0	0	0	0.476	0.476
PHLPP2	SGK3	4450590	4446570	9606.ENSP00000457991	9606.ENSP00000379842	0	0.001	0	0	0.062	0.261	0	0.304	0.475
CISH	TLR7	4448513	4445433	9606.ENSP00000409346	9606.ENSP00000370034	0	0	0	0	0	0	0	0.475	0.475
CETN3	CNTLN	4449436	4445430	9606.ENSP00000428259	9606.ENSP00000370021	0	0	0	0	0.061	0	0	0.463	0.475
C9orf64	TRIM4	4444714	4441812	9606.ENSP00000365522	9606.ENSP00000348216	0	0	0	0	0	0	0	0.474	0.474
FNDC5	RETN	4444192	4433169	9606.ENSP00000362570	9606.ENSP00000221515	0	0	0	0	0	0	0	0.474	0.474
DGKZ	GNA11	4448638	4432654	9606.ENSP00000412178	9606.ENSP00000078429	0	0	0	0	0	0.185	0	0.381	0.474
RIMBP3	CECR6	4451767	4440093	9606.ENSP00000483386	9606.ENSP00000329318	0	0	0	0	0	0	0	0.474	0.474
NEFL	EGR2	4451641	4433822	9606.ENSP00000482169	9606.ENSP00000242480	0	0	0	0	0	0	0	0.474	0.474
SERPINC1	CXCL8	4442941	4438229	9606.ENSP00000356671	9606.ENSP00000306512	0	0	0	0	0	0	0	0.474	0.474
PNOC	CREM	4437808	4435595	9606.ENSP00000301908	9606.ENSP00000265372	0	0	0	0	0	0	0	0.474	0.474
FAM198B	ZNF608	4446191	4438353	9606.ENSP00000377396	9606.ENSP00000307746	0	0	0	0	0	0	0	0.474	0.474
GIPR	CADM2	4450851	4447086	9606.ENSP00000467494	9606.ENSP00000384193	0	0	0	0	0	0	0	0.473	0.473
RAPGEF3	ADRB1	4447902	4443292	9606.ENSP00000395708	9606.ENSP00000358301	0	0	0	0	0	0	0	0.473	0.473
CR1	CXCR2	4442796	4439296	9606.ENSP00000356016	9606.ENSP00000319635	0	0	0	0	0.138	0	0	0.414	0.473
PLTP	RSPH3	4448868	4434243	9606.ENSP00000417138	9606.ENSP00000252655	0	0	0	0	0	0	0	0.473	0.473
C17orf53	PTX4	4438866	4437048	9606.ENSP00000313500	9606.ENSP00000293922	0	0	0	0	0	0	0	0.473	0.473
HTRA1	COL4A2	4443236	4442382	9606.ENSP00000357980	9606.ENSP00000353654	0	0	0	0	0.343	0	0	0.23	0.473
PGF	ADAM12	4450339	4443148	9606.ENSP00000451040	9606.ENSP00000357668	0	0	0	0	0	0	0	0.473	0.473
SHOX2	GATA6	4445865	4435874	9606.ENSP00000374240	9606.ENSP00000269216	0	0	0	0	0.082	0.268	0	0.279	0.473
PLEKHG7	CMTM8	4441476	4438352	9606.ENSP00000344961	9606.ENSP00000307741	0	0	0	0	0	0	0	0.473	0.473
HRH2	GNA11	4444864	4432654	9606.ENSP00000366506	9606.ENSP00000078429	0	0	0	0	0	0.177	0	0.385	0.472
CR1	CD163	4442796	4442211	9606.ENSP00000356016	9606.ENSP00000352071	0	0	0	0	0.15	0	0	0.404	0.472
PGC	CR1	4444085	4442796	9606.ENSP00000362116	9606.ENSP00000356016	0	0	0	0	0.064	0.083	0	0.434	0.472
CCDC11	CCDC114	4446827	4439204	9606.ENSP00000381553	9606.ENSP00000318429	0	0	0	0	0.077	0	0	0.45	0.471
TLR5	CD163	4449957	4442211	9606.ENSP00000440643	9606.ENSP00000352071	0	0	0	0	0.138	0	0	0.412	0.471
TNF	ALPL	4448041	4444459	9606.ENSP00000398698	9606.ENSP00000363973	0	0	0	0	0	0	0	0.47	0.47
FICD	PANX2	4450200	4446462	9606.ENSP00000446479	9606.ENSP00000379183	0	0	0	0	0	0	0	0.47	0.47
PPP1R9A	NRG1	4448365	4447144	9606.ENSP00000405514	9606.ENSP00000384620	0	0	0	0	0	0	0	0.47	0.47
C9orf117	EFHC1	4444154	4443658	9606.ENSP00000362392	9606.ENSP00000360107	0	0	0	0	0.064	0	0	0.457	0.47
HDAC2	SMAD7	4449546	4435020	9606.ENSP00000430432	9606.ENSP00000262158	0	0	0	0	0.055	0.344	0	0.215	0.47
CXCL1	OSM	4446449	4432875	9606.ENSP00000379110	9606.ENSP00000215781	0	0	0	0	0.116	0	0	0.422	0.468
TTN	ANO5	4450840	4438989	9606.ENSP00000467141	9606.ENSP00000315371	0	0	0	0	0.063	0	0	0.455	0.468
CTH	SLC7A11	4443637	4436386	9606.ENSP00000359976	9606.ENSP00000280612	0.059	0	0	0	0.062	0	0	0.445	0.468
TNF	HSPG2	4448041	4444439	9606.ENSP00000398698	9606.ENSP00000363827	0	0	0	0	0.062	0.185	0	0.361	0.468
TMEM63C	CYGB	4437485	4437001	9606.ENSP00000298351	9606.ENSP00000293230	0	0	0	0	0.062	0	0	0.456	0.468
TNF	MSR1	4448041	4435004	9606.ENSP00000398698	9606.ENSP00000262101	0	0	0	0	0.078	0	0	0.447	0.468
MAPT	STX1B	4441081	4432855	9606.ENSP00000340820	9606.ENSP00000215095	0	0	0	0	0.165	0	0	0.389	0.468
KCNJ15	GPD2	4440287	4438431	9606.ENSP00000331698	9606.ENSP00000308610	0	0	0	0	0	0	0	0.468	0.468
RAPGEF3	CXCR4	4447902	4447439	9606.ENSP00000395708	9606.ENSP00000386884	0	0	0	0	0	0	0	0.467	0.467
ADAMTS5	RETN	4436610	4433169	9606.ENSP00000284987	9606.ENSP00000221515	0	0	0	0	0	0	0	0.467	0.467
PRDM1	LGR6	4443256	4442850	9606.ENSP00000358092	9606.ENSP00000356247	0	0	0	0	0	0	0	0.466	0.466
WNT5B	CCND1	4446654	4433391	9606.ENSP00000380379	9606.ENSP00000227507	0	0	0	0	0.076	0	0	0.446	0.466
WNT5B	KL	4446654	4445327	9606.ENSP00000380379	9606.ENSP00000369442	0	0	0	0	0	0.192	0	0.365	0.465
DUSP8	PLK2	4446679	4436123	9606.ENSP00000380530	9606.ENSP00000274289	0	0	0	0	0.063	0.186	0	0.355	0.465
MTHFSD	SH2D4A	4442433	4435649	9606.ENSP00000354152	9606.ENSP00000265807	0	0	0	0	0	0	0	0.464	0.464
FICD	FAM155B	4450200	4434222	9606.ENSP00000446479	9606.ENSP00000252338	0	0	0	0	0	0	0	0.464	0.464
SEMA5A	EPHA2	4445698	4442119	9606.ENSP00000371936	9606.ENSP00000351209	0	0	0	0	0	0.059	0	0.454	0.464
TMC4	CECR2	4451225	4441131	9606.ENSP00000477627	9606.ENSP00000341219	0	0	0	0	0	0	0	0.464	0.464
E2F8	PTTG1	4451562	4446209	9606.ENSP00000481103	9606.ENSP00000377536	0	0	0	0	0.269	0	0	0.296	0.463
NEFL	KIF5C	4451641	4447796	9606.ENSP00000482169	9606.ENSP00000393379	0	0	0	0	0.352	0	0	0.205	0.463
SOCS3	TLR8	4440175	4438750	9606.ENSP00000330341	9606.ENSP00000312082	0	0	0	0	0.077	0	0	0.443	0.463
IGF2	FCGR1A	4447717	4443273	9606.ENSP00000391826	9606.ENSP00000358165	0	0	0	0	0.055	0	0	0.456	0.463
PIANP	PLXNB1	4450023	4442133	9606.ENSP00000442157	9606.ENSP00000351338	0	0	0	0	0.069	0	0	0.447	0.463
TNFSF15	TNFSF9	4444313	4433948	9606.ENSP00000363157	9606.ENSP00000245817	0	0	0	0	0.062	0	0	0.451	0.463
ITGB2	CXCL8	4446737	4438229	9606.ENSP00000380948	9606.ENSP00000306512	0	0	0	0	0.101	0	0	0.427	0.463
NUDT11	KCTD3	4444660	4434679	9606.ENSP00000365160	9606.ENSP00000259154	0	0	0	0	0.061	0	0	0.452	0.463
LRRC27	AKAP6	4443135	4436401	9606.ENSP00000357603	9606.ENSP00000280979	0	0	0	0	0	0	0	0.462	0.462
TLR7	TNFSF10	4445433	4433796	9606.ENSP00000370034	9606.ENSP00000241261	0	0	0	0	0.076	0	0	0.442	0.462
SV2A	STX1B	4443265	4432855	9606.ENSP00000358142	9606.ENSP00000215095	0	0	0	0	0.158	0	0	0.387	0.462
COL11A2	MYO15A	4444442	4432816	9606.ENSP00000363840	9606.ENSP00000205890	0	0	0	0	0.063	0	0	0.449	0.462
DYSF	AHNAK2	4447438	4442323	9606.ENSP00000386881	9606.ENSP00000353114	0	0	0	0	0	0	0	0.462	0.462
HDAC2	AIRE	4449546	4436924	9606.ENSP00000430432	9606.ENSP00000291582	0	0	0	0	0.061	0.387	0	0.139	0.461
HSPG2	LTBP2	4444439	4434987	9606.ENSP00000363827	9606.ENSP00000261978	0	0	0	0	0.152	0.078	0	0.366	0.461
FCGR1A	CLEC9A	4443273	4441795	9606.ENSP00000358165	9606.ENSP00000348074	0	0	0	0	0.137	0	0	0.4	0.46
TLR7	CXCR2	4445433	4439296	9606.ENSP00000370034	9606.ENSP00000319635	0	0	0	0	0.076	0	0	0.44	0.46
NTN4	TRIM9	4441104	4437487	9606.ENSP00000340998	9606.ENSP00000298355	0	0	0	0	0.062	0	0	0.447	0.459
CXCL1	AREG	4446449	4446446	9606.ENSP00000379110	9606.ENSP00000379097	0	0	0	0	0.136	0	0	0.4	0.459
RNF207	ARHGAP29	4444973	4434787	9606.ENSP00000367173	9606.ENSP00000260526	0	0	0	0	0	0	0	0.459	0.459
FCGR1A	TNFSF9	4443273	4433948	9606.ENSP00000358165	9606.ENSP00000245817	0	0	0	0	0	0	0	0.459	0.459
COL11A2	HSPG2	4444442	4444439	9606.ENSP00000363840	9606.ENSP00000363827	0	0	0	0	0.099	0.157	0	0.343	0.458
C1S	ADAMTS13	4447198	4443840	9606.ENSP00000385035	9606.ENSP00000360997	0	0	0	0	0.051	0	0	0.452	0.458
CREM	ATP7B	4435595	4433836	9606.ENSP00000265372	9606.ENSP00000242839	0	0	0	0	0.061	0	0	0.447	0.458
ZNF425	PARS2	4444995	4443717	9606.ENSP00000367300	9606.ENSP00000360327	0	0	0	0	0.052	0	0	0.451	0.457
RNASE1	CCNE1	4446755	4435118	9606.ENSP00000381057	9606.ENSP00000262643	0	0	0	0	0	0	0	0.457	0.457
EFHC1	DNALI1	4443658	4437250	9606.ENSP00000360107	9606.ENSP00000296218	0	0	0	0	0.098	0	0	0.422	0.457
TLR5	CXCR2	4449957	4439296	9606.ENSP00000440643	9606.ENSP00000319635	0	0	0	0	0.089	0	0	0.429	0.457
PGF	CXCR4	4450339	4447439	9606.ENSP00000451040	9606.ENSP00000386884	0	0	0	0	0	0	0	0.457	0.457
PRDM1	BTLA	4443256	4440498	9606.ENSP00000358092	9606.ENSP00000333919	0	0	0	0	0.069	0	0	0.441	0.457
CXCL8	IRAK2	4438229	4434487	9606.ENSP00000306512	9606.ENSP00000256458	0	0	0	0	0.111	0	0	0.415	0.457
PROX2	RPS6KL1	4450349	4441644	9606.ENSP00000451223	9606.ENSP00000346644	0	0	0	0	0	0	0	0.456	0.456
TNFAIP3	TLR8	4451592	4438750	9606.ENSP00000481570	9606.ENSP00000312082	0	0	0	0	0.088	0	0	0.429	0.456
CCR2	MSR1	4436955	4435004	9606.ENSP00000292301	9606.ENSP00000262101	0	0	0	0	0.064	0	0	0.443	0.456
NEFL	ERI1	4451641	4449510	9606.ENSP00000482169	9606.ENSP00000429615	0	0	0	0	0	0	0	0.456	0.456
TOP2A	CCND1	4448614	4433391	9606.ENSP00000411532	9606.ENSP00000227507	0	0	0	0	0.088	0	0	0.427	0.455
IGF2	DNMT3L	4447717	4435929	9606.ENSP00000391826	9606.ENSP00000270172	0	0	0	0	0	0	0	0.455	0.455
GAL3ST1	PTPRK	4447263	4443064	9606.ENSP00000385735	9606.ENSP00000357196	0	0	0	0	0	0	0	0.455	0.455
TNF	SMAD7	4448041	4435020	9606.ENSP00000398698	9606.ENSP00000262158	0	0	0	0	0	0	0	0.454	0.454
GAL3ST1	CNTNAP1	4447263	4435462	9606.ENSP00000385735	9606.ENSP00000264638	0	0	0	0	0	0	0	0.454	0.454
RGS9BP	CNGB1	4440529	4434151	9606.ENSP00000334134	9606.ENSP00000251102	0	0	0	0	0	0	0	0.454	0.454
WASF1	CNR1	4446045	4443334	9606.ENSP00000376368	9606.ENSP00000358513	0	0	0	0	0.086	0	0	0.426	0.454
RGS1	RGS9BP	4442888	4440529	9606.ENSP00000356429	9606.ENSP00000334134	0	0	0	0	0	0	0	0.454	0.454
SYT17	STX1B	4441730	4432855	9606.ENSP00000347538	9606.ENSP00000215095	0	0	0	0	0.063	0.3	0	0.235	0.454
CXCR4	TLR10	4447439	4438459	9606.ENSP00000386884	9606.ENSP00000308925	0	0	0	0	0	0	0	0.454	0.454
VANGL1	TBX1	4441743	4440299	9606.ENSP00000347672	9606.ENSP00000331791	0	0	0	0	0	0	0	0.454	0.454
NODAL	GATA6	4436709	4435874	9606.ENSP00000287139	9606.ENSP00000269216	0	0	0	0	0.06	0.053	0	0.435	0.453
KLHL14	ZNF397	4442241	4440273	9606.ENSP00000352314	9606.ENSP00000331577	0	0	0	0	0	0.057	0	0.444	0.453
ENAM	ADRB1	4446500	4443292	9606.ENSP00000379383	9606.ENSP00000358301	0	0	0	0	0	0	0	0.453	0.453
PHLPP2	MAST1	4450590	4434175	9606.ENSP00000457991	9606.ENSP00000251472	0	0	0	0	0.087	0.267	0	0.249	0.453
PLXNB1	EPHB3	4442133	4440327	9606.ENSP00000351338	9606.ENSP00000332118	0	0	0	0	0.146	0.085	0	0.357	0.453
NXN	KCTD3	4440789	4434679	9606.ENSP00000337443	9606.ENSP00000259154	0	0	0	0	0.062	0	0	0.441	0.453
CYFIP1	NDN	4451554	4440378	9606.ENSP00000481038	9606.ENSP00000332643	0	0	0	0	0.062	0	0	0.441	0.453
TNF	CNR1	4448041	4443334	9606.ENSP00000398698	9606.ENSP00000358513	0	0	0	0	0	0	0	0.452	0.452
CNTNAP1	CHL1	4435462	4434493	9606.ENSP00000264638	9606.ENSP00000256509	0	0	0	0	0.143	0.132	0	0.323	0.452
RGS1	GNA11	4442888	4432654	9606.ENSP00000356429	9606.ENSP00000078429	0	0	0	0	0.064	0.261	0	0.271	0.452
IFT140	NEK8	4448388	4435848	9606.ENSP00000406012	9606.ENSP00000268766	0	0	0	0	0.064	0	0	0.438	0.452
FOXA3	NODAL	4438012	4436709	9606.ENSP00000304004	9606.ENSP00000287139	0	0	0	0	0	0.051	0	0.446	0.452
PGF	TNXB	4450339	4448463	9606.ENSP00000451040	9606.ENSP00000407685	0	0	0	0	0	0	0	0.452	0.452
VSTM2B	KCNJ4	4440629	4438228	9606.ENSP00000335038	9606.ENSP00000306497	0	0	0	0	0.452	0	0	0	0.452
CETN3	FECH	4449436	4445732	9606.ENSP00000428259	9606.ENSP00000372326	0	0	0	0	0.058	0.269	0	0.269	0.452
CISH	CXCL8	4448513	4438229	9606.ENSP00000409346	9606.ENSP00000306512	0	0	0	0	0.061	0	0	0.441	0.452
SEMA5A	MST1R	4445698	4437287	9606.ENSP00000371936	9606.ENSP00000296474	0	0	0	0	0	0.261	0	0.288	0.451
CXCR4	CD163	4447439	4442211	9606.ENSP00000386884	9606.ENSP00000352071	0	0	0	0	0.061	0	0	0.44	0.451
ENC1	PANX2	4451356	4446462	9606.ENSP00000479101	9606.ENSP00000379183	0	0	0	0	0.066	0	0	0.437	0.451
TNF	AREG	4448041	4446446	9606.ENSP00000398698	9606.ENSP00000379097	0	0	0	0	0.061	0	0	0.439	0.451
TLR8	TNFSF10	4438750	4433796	9606.ENSP00000312082	9606.ENSP00000241261	0	0	0	0	0.139	0	0	0.389	0.451
IL23R	CXCL8	4439435	4438229	9606.ENSP00000321345	9606.ENSP00000306512	0	0	0	0	0.061	0	0	0.44	0.451
B4GALNT3	CEP41	4435697	4433273	9606.ENSP00000266383	9606.ENSP00000223208	0	0	0	0	0	0	0	0.451	0.451
PLXNA4	EPHB3	4442296	4440327	9606.ENSP00000352882	9606.ENSP00000332118	0	0	0	0	0.146	0.085	0	0.354	0.451
PRRT2	GNAL	4450531	4440520	9606.ENSP00000456226	9606.ENSP00000334051	0	0	0	0	0	0	0	0.45	0.45
RNF207	GPR153	4444973	4444963	9606.ENSP00000367173	9606.ENSP00000367125	0	0	0	0	0	0	0	0.45	0.45
COL6A2	LTBP2	4437672	4434987	9606.ENSP00000300527	9606.ENSP00000261978	0	0	0	0	0.23	0.063	0	0.299	0.45
TNF	PRDM1	4448041	4443256	9606.ENSP00000398698	9606.ENSP00000358092	0	0	0	0	0.102	0	0	0.413	0.45
NR4A3	ATF3	4451630	4441415	9606.ENSP00000482027	9606.ENSP00000344352	0	0	0	0	0.178	0	0	0.359	0.45
RSPH3	IFT81	4434243	4433825	9606.ENSP00000252655	9606.ENSP00000242591	0	0	0	0	0.087	0	0	0.423	0.45
HSH2D	CHST13	4451698	4439128	9606.ENSP00000482604	9606.ENSP00000317404	0	0	0	0	0	0	0	0.45	0.45
POTEM	AGAP10	4450327	4447732	9606.ENSP00000450853	9606.ENSP00000392206	0	0	0	0	0	0.081	0	0.426	0.45
SH2D1B	SLAMF8	4442985	4436821	9606.ENSP00000356906	9606.ENSP00000289707	0	0	0	0	0	0.068	0	0.434	0.45
WNT6	CCND1	4433609	4433391	9606.ENSP00000233948	9606.ENSP00000227507	0	0	0	0	0	0	0	0.449	0.449
ZNF451	GNAL	4443605	4440520	9606.ENSP00000359740	9606.ENSP00000334051	0	0	0	0	0	0.057	0	0.44	0.449
TNF	NR4A2	4448041	4441430	9606.ENSP00000398698	9606.ENSP00000344479	0	0	0	0	0	0.281	0	0.266	0.449
TNFAIP3	SOCS3	4451592	4440175	9606.ENSP00000481570	9606.ENSP00000330341	0	0	0	0	0.123	0	0	0.398	0.449
FZD5	CELSR1	4442500	4435131	9606.ENSP00000354607	9606.ENSP00000262738	0	0	0	0	0.061	0.161	0	0.355	0.448
CSF2	TNFSF10	4437349	4433796	9606.ENSP00000296871	9606.ENSP00000241261	0	0	0	0	0	0	0	0.448	0.448
TNF	IL26	4448041	4433445	9606.ENSP00000398698	9606.ENSP00000229134	0	0	0	0	0	0	0	0.448	0.448
RYR1	PRKCG	4442273	4435262	9606.ENSP00000352608	9606.ENSP00000263431	0	0	0	0	0.098	0	0	0.413	0.448
INSRR	MST1R	4443062	4437287	9606.ENSP00000357178	9606.ENSP00000296474	0	0	0	0.572	0.061	0.389	0	0.216	0.448
PLTP	RSPH9	4448868	4443891	9606.ENSP00000417138	9606.ENSP00000361238	0	0	0	0	0	0	0	0.448	0.448
CLEC9A	CSF2	4441795	4437349	9606.ENSP00000348074	9606.ENSP00000296871	0	0	0	0	0	0	0	0.448	0.448
MYO7B	ITGB2	4448771	4446737	9606.ENSP00000415090	9606.ENSP00000380948	0	0	0	0	0.133	0.373	0	0.067	0.448
PRRT2	SCN8A	4450531	4441631	9606.ENSP00000456226	9606.ENSP00000346534	0	0	0	0	0.116	0	0	0.4	0.448
ITIH2	FTCD	4442116	4436927	9606.ENSP00000351190	9606.ENSP00000291670	0	0	0	0	0.448	0	0	0	0.448
RASSF6	B4GALNT3	4441058	4435697	9606.ENSP00000340578	9606.ENSP00000266383	0	0	0	0	0.057	0	0	0.439	0.448
ATP7B	ABCC6	4433836	4432814	9606.ENSP00000242839	9606.ENSP00000205557	0.044	0	0	0	0.063	0	0	0.433	0.448
CR1	MADCAM1	4442796	4432866	9606.ENSP00000356016	9606.ENSP00000215637	0	0	0	0	0	0	0	0.448	0.448
LMNA	DSC2	4443076	4436400	9606.ENSP00000357283	9606.ENSP00000280904	0	0	0	0	0	0	0	0.448	0.448
RGS1	EGR2	4442888	4433822	9606.ENSP00000356429	9606.ENSP00000242480	0	0	0	0	0.181	0.05	0	0.346	0.447
ADAMTS5	OSM	4436610	4432875	9606.ENSP00000284987	9606.ENSP00000215781	0	0	0	0	0	0	0	0.447	0.447
KMO	NMNAT2	4442693	4436739	9606.ENSP00000355517	9606.ENSP00000287713	0	0	0	0	0.061	0	0	0.435	0.447
CCDC114	RSPH6A	4439204	4433170	9606.ENSP00000318429	9606.ENSP00000221538	0	0	0	0	0.26	0	0	0.283	0.447
TLR5	CISH	4449957	4448513	9606.ENSP00000440643	9606.ENSP00000409346	0	0	0	0	0	0	0	0.447	0.447
PLXNB1	HGF	4442133	4433227	9606.ENSP00000351338	9606.ENSP00000222390	0	0	0	0	0	0	0	0.447	0.447
LGR6	GLI1	4442850	4433423	9606.ENSP00000356247	9606.ENSP00000228682	0	0	0	0	0	0.053	0	0.44	0.447
NBPF10	TMEM177	4450721	4448242	9606.ENSP00000463957	9606.ENSP00000402661	0	0	0	0	0	0	0	0.446	0.446
ZNF469	COL4A4	4448226	4446575	9606.ENSP00000402343	9606.ENSP00000379866	0	0	0	0	0	0	0	0.446	0.446
HDAC2	CECR2	4449546	4441131	9606.ENSP00000430432	9606.ENSP00000341219	0	0	0	0	0.094	0.266	0	0.234	0.446
EPHA2	CCND1	4442119	4433391	9606.ENSP00000351209	9606.ENSP00000227507	0	0	0	0	0.3	0	0	0.241	0.445
ZGLP1	ZBTB32	4447120	4445996	9606.ENSP00000384434	9606.ENSP00000376035	0	0	0	0	0	0.078	0	0.423	0.445
CISH	CSF2	4448513	4437349	9606.ENSP00000409346	9606.ENSP00000296871	0	0	0	0	0	0	0	0.445	0.445
SSTR3	EDN2	4451544	4443976	9606.ENSP00000480971	9606.ENSP00000361668	0	0	0	0	0	0.157	0	0.369	0.445
PPARA	PGC	4447242	4444085	9606.ENSP00000385523	9606.ENSP00000362116	0	0	0	0	0	0	0	0.445	0.445
AREG	CCND1	4446446	4433391	9606.ENSP00000379097	9606.ENSP00000227507	0	0	0	0	0	0	0	0.445	0.445
CXCL8	IL26	4438229	4433445	9606.ENSP00000306512	9606.ENSP00000229134	0	0	0	0	0	0	0	0.445	0.445
CISH	TLR10	4448513	4438459	9606.ENSP00000409346	9606.ENSP00000308925	0	0	0	0	0.049	0	0	0.441	0.445
KIF20A	CCNE1	4446341	4435118	9606.ENSP00000378356	9606.ENSP00000262643	0	0	0	0	0.256	0.15	0	0.193	0.445
SOCS3	TLR10	4440175	4438459	9606.ENSP00000330341	9606.ENSP00000308925	0	0	0	0	0.06	0	0	0.434	0.445
AIRE	GNA11	4436924	4432654	9606.ENSP00000291582	9606.ENSP00000078429	0	0	0	0	0	0	0	0.444	0.444
TLR8	OSM	4438750	4432875	9606.ENSP00000312082	9606.ENSP00000215781	0	0	0	0	0.337	0	0	0.197	0.444
NSFL1C	ACOT11	4448968	4443721	9606.ENSP00000418529	9606.ENSP00000360366	0	0	0	0	0	0	0	0.444	0.444
ENSG00000204176	STX1B	4444370	4432855	9606.ENSP00000363441	9606.ENSP00000215095	0	0	0	0	0	0.3	0	0.239	0.444
PPAPDC3	FAM114A1	4443908	4442182	9606.ENSP00000361338	9606.ENSP00000351740	0	0	0	0	0	0	0	0.443	0.443
VSTM2B	CEND1	4440629	4440012	9606.ENSP00000335038	9606.ENSP00000328336	0	0	0	0	0.443	0	0	0	0.443
CXCR4	PRDM1	4447439	4443256	9606.ENSP00000386884	9606.ENSP00000358092	0	0	0	0	0.062	0.05	0	0.425	0.443
KIR2DL3	PVRL2	4441235	4434226	9606.ENSP00000342215	9606.ENSP00000252483	0	0	0	0	0	0	0	0.443	0.443
MANSC1	APOLD1	4449853	4439676	9606.ENSP00000438205	9606.ENSP00000324277	0	0	0	0	0	0	0	0.443	0.443
NLRC4	CXCL8	4447203	4438229	9606.ENSP00000385090	9606.ENSP00000306512	0	0	0	0	0.073	0	0	0.423	0.442
ZNF860	CMTM8	4445773	4438352	9606.ENSP00000373274	9606.ENSP00000307741	0	0	0	0	0	0	0	0.442	0.442
FN3K	ANK1	4437695	4435633	9606.ENSP00000300784	9606.ENSP00000265709	0	0	0	0	0.062	0	0	0.43	0.442
TLR7	TLR10	4445433	4438459	9606.ENSP00000370034	9606.ENSP00000308925	0	0	0	0.568	0.211	0	0	0.688	0.441
VANGL1	NKD1	4441743	4435823	9606.ENSP00000347672	9606.ENSP00000268459	0	0	0	0	0	0	0	0.441	0.441
NBPF10	PABPC3	4450721	4436437	9606.ENSP00000463957	9606.ENSP00000281589	0	0	0	0	0	0	0	0.441	0.441
TLR5	SOCS3	4449957	4440175	9606.ENSP00000440643	9606.ENSP00000330341	0	0	0	0	0	0	0	0.441	0.441
MMACHC	ADAMTS13	4447043	4443840	9606.ENSP00000383840	9606.ENSP00000360997	0	0	0	0	0	0	0	0.441	0.441
ACOT11	STAR	4443721	4436225	9606.ENSP00000360366	9606.ENSP00000276449	0	0	0	0	0	0	0	0.441	0.441
RNF207	GNAL	4444973	4440520	9606.ENSP00000367173	9606.ENSP00000334051	0	0	0	0	0.061	0	0	0.429	0.441
TLR5	CLEC9A	4449957	4441795	9606.ENSP00000440643	9606.ENSP00000348074	0	0	0	0	0.061	0.06	0	0.417	0.44
E2F8	ASF1B	4451562	4435253	9606.ENSP00000481103	9606.ENSP00000263382	0	0	0	0	0.32	0	0	0.211	0.44
HDAC2	CHFR	4449546	4447744	9606.ENSP00000430432	9606.ENSP00000392395	0	0.043	0	0	0	0.373	0	0.14	0.439
ADM	TNF	4449788	4448041	9606.ENSP00000436607	9606.ENSP00000398698	0	0	0	0	0	0	0	0.439	0.439
TLR5	TLR8	4449957	4438750	9606.ENSP00000440643	9606.ENSP00000312082	0	0	0	0.593	0.139	0	0	0.862	0.439
SLC15A2	SLC7A5	4448865	4434914	9606.ENSP00000417085	9606.ENSP00000261622	0	0	0	0	0.063	0	0	0.426	0.439
TNF	IGF2	4448041	4447717	9606.ENSP00000398698	9606.ENSP00000391826	0	0	0	0	0	0	0	0.438	0.438
ATF3	MCAM	4441415	4435364	9606.ENSP00000344352	9606.ENSP00000264036	0	0	0	0	0	0	0	0.437	0.437
CD200	CXCR2	4449108	4439296	9606.ENSP00000420298	9606.ENSP00000319635	0	0	0	0	0	0	0	0.436	0.436
SUV39H2	DNMT3L	4441678	4435929	9606.ENSP00000346997	9606.ENSP00000270172	0	0	0	0	0.055	0.157	0	0.35	0.436
TNFAIP3	TLR5	4451592	4449957	9606.ENSP00000481570	9606.ENSP00000440643	0	0	0	0	0.061	0	0	0.425	0.436
SPINT1	MST1R	4441220	4437287	9606.ENSP00000342098	9606.ENSP00000296474	0	0	0	0	0.142	0.07	0	0.351	0.436
EHF	EGR2	4449763	4433822	9606.ENSP00000435835	9606.ENSP00000242480	0	0	0	0	0	0.052	0	0.43	0.436
DLG5	MAP1B	4443928	4437332	9606.ENSP00000361467	9606.ENSP00000296755	0	0	0	0	0.083	0.371	0	0.099	0.435
SLITRK4	RNFT2	4450903	4434557	9606.ENSP00000469205	9606.ENSP00000257575	0	0	0	0	0.062	0	0	0.423	0.435
KISS1R	RETN	4433626	4433169	9606.ENSP00000234371	9606.ENSP00000221515	0	0	0	0	0	0	0	0.435	0.435
FAM198B	LRRN1	4446191	4438958	9606.ENSP00000377396	9606.ENSP00000314901	0	0	0	0	0	0	0	0.434	0.434
NKD1	PHLDA1	4435823	4435719	9606.ENSP00000268459	9606.ENSP00000266671	0	0	0	0	0	0	0	0.434	0.434
CDK18	AVPI1	4449260	4443585	9606.ENSP00000423665	9606.ENSP00000359660	0	0	0	0	0	0	0	0.434	0.434
AVPI1	B3GNT7	4443585	4436730	9606.ENSP00000359660	9606.ENSP00000287590	0	0	0	0	0	0	0	0.434	0.434
DLC1	RTKN	4436217	4436029	9606.ENSP00000276297	9606.ENSP00000272430	0	0	0	0	0	0	0	0.434	0.434
PNOC	ATP7B	4437808	4433836	9606.ENSP00000301908	9606.ENSP00000242839	0	0	0	0	0	0	0	0.434	0.434
CDK18	PLK2	4449260	4436123	9606.ENSP00000423665	9606.ENSP00000274289	0	0	0	0.59	0.204	0.267	0	0.202	0.433
TTN	KLHL30	4450840	4447370	9606.ENSP00000467141	9606.ENSP00000386389	0	0	0	0	0.224	0.3	0	0	0.433
PCGF2	LMNA	4451633	4443076	9606.ENSP00000482063	9606.ENSP00000357283	0	0	0	0	0.063	0.328	0	0.173	0.433
FANCA	LGR4	4445843	4445176	9606.ENSP00000373952	9606.ENSP00000368516	0	0	0	0	0	0	0	0.432	0.432
CXCR4	RGS1	4447439	4442888	9606.ENSP00000386884	9606.ENSP00000356429	0	0	0	0	0.187	0.05	0	0.324	0.432
WASF1	NXN	4446045	4440789	9606.ENSP00000376368	9606.ENSP00000337443	0	0	0	0	0	0.432	0	0	0.432
TNXB	COL11A2	4448463	4444442	9606.ENSP00000407685	9606.ENSP00000363840	0	0	0	0	0.096	0	0	0.398	0.432
TNXB	COL6A2	4448463	4437672	9606.ENSP00000407685	9606.ENSP00000300527	0	0	0	0	0.11	0	0	0.389	0.432
LGR4	FZD5	4445176	4442500	9606.ENSP00000368516	9606.ENSP00000354607	0	0	0	0	0.069	0	0	0.415	0.432
TEX22	APOLD1	4447958	4439676	9606.ENSP00000397002	9606.ENSP00000324277	0	0	0	0	0	0	0	0.431	0.431
LEPR	KISS1R	4440182	4433626	9606.ENSP00000330393	9606.ENSP00000234371	0	0	0	0	0	0	0	0.431	0.431
ABTB2	DEPDC7	4448540	4433792	9606.ENSP00000410157	9606.ENSP00000241051	0	0	0	0	0	0	0	0.431	0.431
SIGLEC11	TNF	4448647	4448041	9606.ENSP00000412361	9606.ENSP00000398698	0	0	0	0	0	0	0	0.431	0.431
DPF3	MEOX1	4451397	4439465	9606.ENSP00000479526	9606.ENSP00000321684	0	0	0	0	0	0	0	0.431	0.431
NRG1	HGF	4447144	4433227	9606.ENSP00000384620	9606.ENSP00000222390	0	0	0	0	0.062	0	0	0.417	0.429
SOCS3	CCND1	4440175	4433391	9606.ENSP00000330341	9606.ENSP00000227507	0	0	0	0	0	0	0	0.429	0.429
CR1	TLR8	4442796	4438750	9606.ENSP00000356016	9606.ENSP00000312082	0	0	0	0	0.237	0.06	0	0.268	0.429
ZNF471	AMZ1	4438480	4438388	9606.ENSP00000309161	9606.ENSP00000308149	0	0	0	0	0	0	0	0.429	0.429
HSPG2	SERPINC1	4444439	4442941	9606.ENSP00000363827	9606.ENSP00000356671	0	0	0	0	0	0	0	0.429	0.429
MUC6	PGC	4448430	4444085	9606.ENSP00000406861	9606.ENSP00000362116	0	0	0	0	0	0	0	0.429	0.429
WNT5B	PRICKLE1	4446654	4441486	9606.ENSP00000380379	9606.ENSP00000345064	0	0	0	0	0.061	0.157	0	0.335	0.428
TMEM169	ZSCAN2	4448653	4448542	9606.ENSP00000412524	9606.ENSP00000410198	0	0	0	0	0	0	0	0.428	0.428
AREG	CSF2	4446446	4437349	9606.ENSP00000379097	9606.ENSP00000296871	0	0	0	0	0.087	0	0	0.399	0.428
PACSIN1	MAPT	4451827	4441081	9606.ENSP00000484060	9606.ENSP00000340820	0	0	0	0	0.172	0.299	0	0.094	0.428
FZD5	PRICKLE1	4442500	4441486	9606.ENSP00000354607	9606.ENSP00000345064	0	0	0	0	0	0.157	0	0.35	0.428
PTGFRN	CTTNBP2NL	4446120	4435971	9606.ENSP00000376899	9606.ENSP00000271277	0	0	0	0	0.066	0	0	0.412	0.428
MOB3B	MAST1	4435040	4434175	9606.ENSP00000262244	9606.ENSP00000251472	0	0	0	0	0.061	0.322	0	0.175	0.428
CXCR2	TLR10	4439296	4438459	9606.ENSP00000319635	9606.ENSP00000308925	0	0	0	0	0.088	0	0	0.399	0.428
ADAM12	RYR1	4443148	4442273	9606.ENSP00000357668	9606.ENSP00000352608	0	0	0	0	0	0.067	0	0.413	0.428
ACSBG2	RIMBP3C	4450779	4447664	9606.ENSP00000465589	9606.ENSP00000390630	0	0	0	0	0	0	0	0.427	0.427
WNT6	GLI1	4433609	4433423	9606.ENSP00000233948	9606.ENSP00000228682	0	0	0	0	0.061	0.084	0	0.388	0.427
NOP16	POLR2F	4451531	4448289	9606.ENSP00000480832	9606.ENSP00000403852	0	0	0	0	0.174	0	0	0.335	0.427
EPS8	PVRL2	4436418	4434226	9606.ENSP00000281172	9606.ENSP00000252483	0	0	0	0	0	0	0	0.426	0.426
PPARA	CETP	4447242	4432783	9606.ENSP00000385523	9606.ENSP00000200676	0	0	0	0	0	0	0	0.427	0.426
ADM	CXCL8	4449788	4438229	9606.ENSP00000436607	9606.ENSP00000306512	0	0	0	0	0.088	0	0	0.397	0.426
ATF3	APOLD1	4441415	4439676	9606.ENSP00000344352	9606.ENSP00000324277	0	0	0	0	0	0	0	0.426	0.426
ACSBG2	ALS2CR11	4450779	4448531	9606.ENSP00000465589	9606.ENSP00000409937	0	0	0	0	0.063	0	0	0.413	0.426
VANGL1	WNT6	4441743	4433609	9606.ENSP00000347672	9606.ENSP00000233948	0	0	0	0	0	0.185	0	0.325	0.426
SLMO1	TMEM200A	4448332	4446018	9606.ENSP00000404700	9606.ENSP00000376224	0	0	0	0	0	0	0	0.426	0.426
COL6A3	FAM189A1	4437161	4434848	9606.ENSP00000295550	9606.ENSP00000261275	0	0	0	0	0	0	0	0.425	0.425
NPHP1	IFT80	4438844	4438823	9606.ENSP00000313169	9606.ENSP00000312778	0	0	0	0	0.089	0	0	0.394	0.425
GCNT1	GBGT1	4448787	4443869	9606.ENSP00000415454	9606.ENSP00000361110	0	0	0	0	0	0	0	0.425	0.425
LMNA	CCND1	4443076	4433391	9606.ENSP00000357283	9606.ENSP00000227507	0	0	0	0	0.113	0	0	0.378	0.425
HEY1	CCND1	4440859	4433391	9606.ENSP00000338272	9606.ENSP00000227507	0	0	0	0	0	0	0	0.424	0.424
ZNF404	COCH	4450795	4446573	9606.ENSP00000466051	9606.ENSP00000379862	0	0	0	0	0	0	0	0.424	0.424
ARHGEF28	RBM45	4450010	4436659	9606.ENSP00000441913	9606.ENSP00000286070	0	0	0	0	0.061	0	0	0.412	0.424
FLNC	ANO5	4439901	4438989	9606.ENSP00000327145	9606.ENSP00000315371	0	0	0	0	0.064	0	0	0.41	0.424
SLMO1	TMEM8A	4448332	4448169	9606.ENSP00000404700	9606.ENSP00000401338	0	0	0	0	0	0	0	0.424	0.424
MUC5B	CXCL8	4449799	4438229	9606.ENSP00000436812	9606.ENSP00000306512	0	0	0	0	0	0	0	0.424	0.424
ZNF277	ZNF585A	4442478	4436992	9606.ENSP00000354501	9606.ENSP00000292841	0	0	0	0	0	0	0	0.425	0.424
CDK18	CCND1	4449260	4433391	9606.ENSP00000423665	9606.ENSP00000227507	0	0	0	0	0.055	0.313	0	0.185	0.424
PHOSPHO2	KLHL23	4451556	4446054	9606.ENSP00000481046	9606.ENSP00000376419	0	0	0	0	0	0	0	0.425	0.424
GPER1	CCND1	4446636	4433391	9606.ENSP00000380281	9606.ENSP00000227507	0	0	0	0	0	0	0	0.424	0.424
TOP2A	SMARCA5	4448614	4436522	9606.ENSP00000411532	9606.ENSP00000283131	0	0	0	0	0.198	0.185	0	0.188	0.423
CD200	MCAM	4449108	4435364	9606.ENSP00000420298	9606.ENSP00000264036	0	0	0	0	0.061	0	0	0.411	0.423
WNT5B	CELSR1	4446654	4435131	9606.ENSP00000380379	9606.ENSP00000262738	0	0	0	0	0.063	0.084	0	0.38	0.422
PGF	CSF2	4450339	4437349	9606.ENSP00000451040	9606.ENSP00000296871	0	0	0	0	0	0	0	0.423	0.422
KIF5C	SV2A	4447796	4443265	9606.ENSP00000393379	9606.ENSP00000358142	0	0	0	0	0.23	0.058	0	0.268	0.422
DHRS9	MN1	4447595	4438094	9606.ENSP00000389241	9606.ENSP00000304956	0	0	0	0	0	0	0	0.422	0.422
RPH3AL	STX1A	4440063	4433256	9606.ENSP00000328977	9606.ENSP00000222812	0	0	0	0	0	0.123	0	0.368	0.422
RAI14	TRIOBP	4449387	4447103	9606.ENSP00000427123	9606.ENSP00000384312	0	0	0	0	0	0.423	0	0	0.422
RIMBP3C	SEZ6L	4447664	4434073	9606.ENSP00000390630	9606.ENSP00000248933	0	0	0	0	0	0	0	0.422	0.422
GNAL	TRPM5	4440520	4432664	9606.ENSP00000334051	9606.ENSP00000155858	0	0	0	0	0	0.086	0	0.394	0.422
ENC1	PPP1R9A	4451356	4448365	9606.ENSP00000479101	9606.ENSP00000405514	0	0	0	0	0.061	0	0	0.409	0.422
GAS6	SOCS3	4440301	4440175	9606.ENSP00000331831	9606.ENSP00000330341	0	0	0	0	0.07	0	0	0.403	0.421
PROX2	NPHP1	4450349	4438844	9606.ENSP00000451223	9606.ENSP00000313169	0	0	0	0	0.086	0	0	0.393	0.421
XKRX	ZNF331	4444063	4434288	9606.ENSP00000362047	9606.ENSP00000253144	0	0	0	0	0	0	0	0.421	0.421
ACOT11	TCEANC2	4443721	4433640	9606.ENSP00000360366	9606.ENSP00000234827	0	0	0	0	0.078	0	0	0.398	0.421
PRRT2	ARNTL	4450531	4447127	9606.ENSP00000456226	9606.ENSP00000384517	0	0	0	0	0	0	0	0.421	0.421
PLXNB1	EPHA2	4442133	4442119	9606.ENSP00000351338	9606.ENSP00000351209	0	0	0	0	0.139	0.085	0	0.323	0.421
FUT2	MAPK8IP1	4447509	4433790	9606.ENSP00000387498	9606.ENSP00000241014	0	0	0	0	0	0	0	0.421	0.421
ZFHX2	CCIN	4448689	4440621	9606.ENSP00000413418	9606.ENSP00000334996	0	0	0	0	0	0	0	0.421	0.421
WNT5B	GLI1	4446654	4433423	9606.ENSP00000380379	9606.ENSP00000228682	0	0	0	0	0.064	0.084	0	0.379	0.421
MAP3K6	FBXO24	4449055	4448834	9606.ENSP00000419591	9606.ENSP00000416558	0	0	0	0	0	0	0	0.421	0.42
FAM179A	MTCL1	4445232	4442301	9606.ENSP00000368876	9606.ENSP00000352927	0	0	0	0	0	0	0	0.421	0.42
CCDC180	FHDC1	4449721	4449408	9606.ENSP00000434727	9606.ENSP00000427567	0	0	0	0	0	0	0	0.421	0.42
LMNA	ANO5	4443076	4438989	9606.ENSP00000357283	9606.ENSP00000315371	0	0	0	0	0	0	0	0.421	0.42
COL4A2	FLNC	4442382	4439901	9606.ENSP00000353654	9606.ENSP00000327145	0	0	0	0	0.328	0	0	0.173	0.42
ENTPD2	SLC1A3	4441701	4435561	9606.ENSP00000347213	9606.ENSP00000265113	0	0	0	0	0	0	0	0.421	0.42
TMEM169	AGAP10	4448653	4447732	9606.ENSP00000412524	9606.ENSP00000392206	0	0	0	0	0	0	0	0.421	0.42
BTLA	TNFSF9	4440498	4433948	9606.ENSP00000333919	9606.ENSP00000245817	0	0	0	0	0	0	0	0.421	0.42
CCNE1	GLI1	4435118	4433423	9606.ENSP00000262643	9606.ENSP00000228682	0	0	0	0	0	0.085	0	0.391	0.419
DNAJB5	RSPH10B2	4448300	4447161	9606.ENSP00000404079	9606.ENSP00000384766	0	0	0	0	0.062	0	0	0.406	0.419
ATF3	DUSP2	4441415	4436790	9606.ENSP00000344352	9606.ENSP00000288943	0	0	0	0	0.063	0.111	0	0.359	0.419
FZD2	NKD1	4439648	4435823	9606.ENSP00000323901	9606.ENSP00000268459	0	0	0	0	0.059	0.164	0	0.321	0.419
IFT140	FAM179A	4448388	4445232	9606.ENSP00000406012	9606.ENSP00000368876	0	0	0	0	0.064	0	0	0.405	0.419
KIAA0226L	ZNF860	4447952	4445773	9606.ENSP00000396935	9606.ENSP00000373274	0	0	0	0	0	0.043	0	0.418	0.419
TCTN3	NEK8	4451765	4435848	9606.ENSP00000483364	9606.ENSP00000268766	0	0	0	0	0	0	0	0.419	0.418
SOCS3	MAPK8IP1	4440175	4433790	9606.ENSP00000330341	9606.ENSP00000241014	0	0	0	0	0	0.379	0	0.101	0.418
CXCL8	ANGPTL4	4438229	4437761	9606.ENSP00000306512	9606.ENSP00000301455	0	0	0	0	0	0	0	0.418	0.418
INSRR	DOK1	4443062	4433599	9606.ENSP00000357178	9606.ENSP00000233668	0	0	0	0	0	0.347	0	0.146	0.418
ADAM12	COL6A3	4443148	4437161	9606.ENSP00000357668	9606.ENSP00000295550	0	0	0	0	0.161	0	0	0.334	0.418
HSPG2	HGF	4444439	4433227	9606.ENSP00000363827	9606.ENSP00000222390	0	0	0	0	0	0	0	0.419	0.418
HEY1	DTX1	4440859	4434558	9606.ENSP00000338272	9606.ENSP00000257600	0	0	0	0	0.061	0	0	0.404	0.417
ENSG00000204176	RPH3AL	4444370	4440063	9606.ENSP00000363441	9606.ENSP00000328977	0	0	0	0	0.061	0	0	0.404	0.417
SLITRK4	NETO1	4450903	4438838	9606.ENSP00000469205	9606.ENSP00000313088	0	0	0	0	0.083	0	0	0.389	0.416
TLR5	IL23R	4449957	4439435	9606.ENSP00000440643	9606.ENSP00000321345	0	0	0	0	0	0	0	0.416	0.416
SAMD4A	PHC2	4445986	4434529	9606.ENSP00000375919	9606.ENSP00000257118	0	0	0	0	0	0	0	0.416	0.416
CEACAM3	TLR8	4441996	4438750	9606.ENSP00000349971	9606.ENSP00000312082	0	0	0	0	0.39	0	0	0.082	0.416
NPHP1	NODAL	4438844	4436709	9606.ENSP00000313169	9606.ENSP00000287139	0	0	0	0	0	0	0	0.416	0.416
TNFAIP3	TLR10	4451592	4438459	9606.ENSP00000481570	9606.ENSP00000308925	0	0	0	0	0	0	0	0.416	0.416
SCN8A	SCN3A	4441631	4436534	9606.ENSP00000346534	9606.ENSP00000283254	0	0	0	0.976	0.107	0	0.36	0.897	0.416
PHLPP2	PDE4D	4450590	4441530	9606.ENSP00000457991	9606.ENSP00000345502	0	0	0	0	0.097	0.137	0	0.311	0.416
SERPINC1	HBA2	4442941	4434183	9606.ENSP00000356671	9606.ENSP00000251595	0	0	0	0	0	0	0	0.415	0.415
TLR5	TNFSF10	4449957	4433796	9606.ENSP00000440643	9606.ENSP00000241261	0	0	0	0	0.1	0	0	0.377	0.415
DPF3	HEY1	4451397	4440859	9606.ENSP00000479526	9606.ENSP00000338272	0	0	0	0	0	0.373	0	0.105	0.415
C1QC	FCGR1B	4444427	4443305	9606.ENSP00000363770	9606.ENSP00000358391	0	0	0	0	0.304	0	0	0.194	0.415
SERPINC1	HBA1	4442941	4439524	9606.ENSP00000356671	9606.ENSP00000322421	0	0	0	0	0	0	0	0.415	0.415
AREG	ANGPTL4	4446446	4437761	9606.ENSP00000379097	9606.ENSP00000301455	0	0	0	0	0	0	0	0.415	0.414
AREG	ADAM12	4446446	4443148	9606.ENSP00000379097	9606.ENSP00000357668	0	0	0	0	0	0	0	0.415	0.414
GPD2	RETN	4438431	4433169	9606.ENSP00000308610	9606.ENSP00000221515	0	0	0	0	0	0	0	0.414	0.414
RGS1	NR4A2	4442888	4441430	9606.ENSP00000356429	9606.ENSP00000344479	0	0	0	0	0.156	0	0	0.333	0.414
CAPN14	MAPT	4447215	4441081	9606.ENSP00000385247	9606.ENSP00000340820	0	0	0	0	0	0	0	0.414	0.414
C9orf84	CREB5	4444361	4442040	9606.ENSP00000363405	9606.ENSP00000350359	0	0	0	0	0	0	0	0.414	0.414
TNF	CLEC9A	4448041	4441795	9606.ENSP00000398698	9606.ENSP00000348074	0	0	0	0	0	0.185	0	0.311	0.414
IL23R	TLR10	4439435	4438459	9606.ENSP00000321345	9606.ENSP00000308925	0	0	0	0	0	0	0	0.414	0.414
KBTBD12	KLHL34	4447292	4445224	9606.ENSP00000385957	9606.ENSP00000368813	0	0	0	0.612	0.236	0	0	0.617	0.414
KIAA0226L	CCDC11	4447952	4446827	9606.ENSP00000396935	9606.ENSP00000381553	0	0	0	0	0	0	0	0.414	0.414
PPARA	RETN	4447242	4433169	9606.ENSP00000385523	9606.ENSP00000221515	0	0	0	0	0	0	0	0.415	0.414
SMARCA5	ASF1B	4436522	4435253	9606.ENSP00000283131	9606.ENSP00000263382	0	0	0	0	0.12	0.186	0	0.247	0.413
RYR1	SPRY3	4442273	4437919	9606.ENSP00000352608	9606.ENSP00000302978	0	0	0	0	0	0	0	0.413	0.413
IGF2	KIAA1161	4447717	4437426	9606.ENSP00000391826	9606.ENSP00000297625	0	0	0	0	0	0.299	0	0.198	0.413
CXCL2	AREG	4449392	4446446	9606.ENSP00000427279	9606.ENSP00000379097	0	0	0	0	0.136	0	0	0.349	0.413
TNF	DUOX1	4448041	4439166	9606.ENSP00000398698	9606.ENSP00000317997	0	0	0	0	0.061	0	0	0.401	0.413
ADAMTS13	VWDE	4443840	4436182	9606.ENSP00000360997	9606.ENSP00000275358	0	0	0	0	0	0	0	0.413	0.413
HDAC2	ATF3	4449546	4441415	9606.ENSP00000430432	9606.ENSP00000344352	0	0	0	0	0	0.267	0	0.232	0.413
CHRNB1	AIRE	4438039	4436924	9606.ENSP00000304290	9606.ENSP00000291582	0	0	0	0	0	0.085	0	0.385	0.413
ZSCAN2	NUPL2	4448542	4434651	9606.ENSP00000410198	9606.ENSP00000258742	0	0	0	0	0	0.064	0	0.398	0.412
GALNTL6	FUT2	4449243	4447509	9606.ENSP00000423313	9606.ENSP00000387498	0	0	0	0	0.062	0	0	0.399	0.412
CCR8	CSF2	4439852	4437349	9606.ENSP00000326432	9606.ENSP00000296871	0	0	0	0	0	0	0	0.413	0.412
GPR161	GLI1	4449974	4433423	9606.ENSP00000441039	9606.ENSP00000228682	0	0	0	0	0	0.05	0	0.407	0.412
KCNJ15	RETN	4440287	4433169	9606.ENSP00000331698	9606.ENSP00000221515	0	0	0	0	0	0	0	0.412	0.412
XRCC3	TOP2A	4450379	4448614	9606.ENSP00000451974	9606.ENSP00000411532	0	0	0	0	0.108	0.129	0	0.304	0.412
ADM	HGF	4449788	4433227	9606.ENSP00000436607	9606.ENSP00000222390	0	0	0	0	0	0	0	0.411	0.411
CNR1	CHL1	4443334	4434493	9606.ENSP00000358513	9606.ENSP00000256509	0	0	0	0	0.285	0	0	0.21	0.411
CDH23	COL11A2	4446856	4444442	9606.ENSP00000381768	9606.ENSP00000363840	0	0	0	0	0.061	0	0	0.399	0.411
LMNA	FLNC	4443076	4439901	9606.ENSP00000357283	9606.ENSP00000327145	0	0	0	0	0.102	0.064	0	0.356	0.411
GALNT6	FUT2	4450107	4447509	9606.ENSP00000444171	9606.ENSP00000387498	0	0	0	0	0.051	0	0	0.405	0.411
RASSF6	SCARB2	4441058	4435511	9606.ENSP00000340578	9606.ENSP00000264896	0	0	0	0	0	0	0	0.411	0.411
PTPRK	PLXNB1	4443064	4442133	9606.ENSP00000357196	9606.ENSP00000351338	0	0	0	0	0.096	0	0	0.375	0.411
MAPT	NMNAT2	4441081	4436739	9606.ENSP00000340820	9606.ENSP00000287713	0	0	0	0	0.17	0.166	0	0.218	0.411
ITGB2	TNFSF10	4446737	4433796	9606.ENSP00000380948	9606.ENSP00000241261	0	0	0	0	0.139	0	0	0.343	0.41
WNT5B	ROR1	4446654	4443662	9606.ENSP00000380379	9606.ENSP00000360120	0	0	0	0	0.061	0.191	0	0.286	0.41
SPIB	EHF	4451014	4449763	9606.ENSP00000471921	9606.ENSP00000435835	0	0	0	0	0	0	0	0.41	0.41
TNF	CCR8	4448041	4439852	9606.ENSP00000398698	9606.ENSP00000326432	0	0	0	0	0.063	0	0	0.397	0.41
TSHR	DUOX1	4449981	4439166	9606.ENSP00000441235	9606.ENSP00000317997	0	0	0	0	0	0	0	0.41	0.41
CLEC9A	TLR10	4441795	4438459	9606.ENSP00000348074	9606.ENSP00000308925	0	0	0	0	0	0.06	0	0.399	0.41
MUC5B	CEACAM6	4449799	4432774	9606.ENSP00000436812	9606.ENSP00000199764	0	0	0	0	0.128	0	0	0.351	0.409
SEMA5A	MACROD2	4445698	4433008	9606.ENSP00000371936	9606.ENSP00000217246	0	0	0	0	0	0	0	0.409	0.409
RASSF6	ZNF225	4441058	4435158	9606.ENSP00000340578	9606.ENSP00000262894	0	0	0	0	0	0	0	0.409	0.409
PACSIN1	DGKZ	4451827	4448638	9606.ENSP00000484060	9606.ENSP00000412178	0	0	0	0	0.077	0	0	0.386	0.409
IFT80	GLI1	4438823	4433423	9606.ENSP00000312778	9606.ENSP00000228682	0	0	0	0	0	0.081	0	0.382	0.408
MTHFSD	RBM45	4442433	4436659	9606.ENSP00000354152	9606.ENSP00000286070	0	0	0	0	0	0	0	0.408	0.408
CD163L1	CD180	4447800	4434486	9606.ENSP00000393474	9606.ENSP00000256447	0	0	0	0	0	0	0	0.408	0.408
RYR1	MYOM1	4442273	4441863	9606.ENSP00000352608	9606.ENSP00000348821	0	0	0	0	0.091	0	0	0.375	0.408
CEND1	TBC1D16	4440012	4438542	9606.ENSP00000328336	9606.ENSP00000309794	0	0	0	0	0	0	0	0.408	0.408
PPAPDC3	LMNA	4443908	4443076	9606.ENSP00000361338	9606.ENSP00000357283	0	0	0	0	0	0	0	0.409	0.408
TNFAIP3	DUSP2	4451592	4436790	9606.ENSP00000481570	9606.ENSP00000288943	0	0	0	0	0.191	0	0	0.297	0.407
CYFIP1	KCNG1	4451554	4443773	9606.ENSP00000481038	9606.ENSP00000360626	0	0	0	0	0	0.077	0	0.384	0.407
ITGB2	RGS1	4446737	4442888	9606.ENSP00000380948	9606.ENSP00000356429	0	0	0	0	0.355	0	0	0.117	0.407
PLXNA4	HGF	4442296	4433227	9606.ENSP00000352882	9606.ENSP00000222390	0	0	0	0	0	0	0	0.407	0.407
MCAM	HGF	4435364	4433227	9606.ENSP00000264036	9606.ENSP00000222390	0	0	0	0	0	0	0	0.405	0.405
DUOX1	CXCL8	4439166	4438229	9606.ENSP00000317997	9606.ENSP00000306512	0	0	0	0	0.049	0	0	0.4	0.405
RNASE1	MKI67	4446755	4443142	9606.ENSP00000381057	9606.ENSP00000357643	0	0	0	0	0	0	0	0.405	0.405
GPER1	PPAPDC3	4446636	4443908	9606.ENSP00000380281	9606.ENSP00000361338	0	0	0	0	0	0	0	0.405	0.405
CD163	TLR10	4442211	4438459	9606.ENSP00000352071	9606.ENSP00000308925	0	0	0	0	0.072	0	0	0.385	0.405
CD163L1	CEACAM19	4447800	4447176	9606.ENSP00000393474	9606.ENSP00000384887	0	0	0	0	0	0	0	0.405	0.405
COL11A2	OSGEP	4444442	4432822	9606.ENSP00000363840	9606.ENSP00000206542	0	0	0	0	0	0	0	0.405	0.405
FAM50B	ZNF331	4445361	4434288	9606.ENSP00000369627	9606.ENSP00000253144	0	0	0	0	0	0.055	0	0.397	0.405
ALPL	MCAM	4444459	4435364	9606.ENSP00000363973	9606.ENSP00000264036	0	0	0	0	0	0	0	0.405	0.405
CXCR4	MKI67	4447439	4443142	9606.ENSP00000386884	9606.ENSP00000357643	0	0	0	0	0.061	0	0	0.392	0.405
DYSF	MYOM1	4447438	4441863	9606.ENSP00000386881	9606.ENSP00000348821	0	0	0	0	0.061	0.265	0	0.206	0.404
HP	ATP7B	4441808	4433836	9606.ENSP00000348170	9606.ENSP00000242839	0	0	0	0	0.061	0.379	0	0.06	0.404
LRIT3	RGS9BP	4450928	4440529	9606.ENSP00000469759	9606.ENSP00000334134	0	0	0	0	0	0	0	0.404	0.404
SEMA5A	HGF	4445698	4433227	9606.ENSP00000371936	9606.ENSP00000222390	0	0	0	0	0	0	0	0.404	0.404
SHROOM1	LOXHD1	4445102	4437680	9606.ENSP00000367950	9606.ENSP00000300591	0	0	0	0	0	0	0	0.404	0.404
FZD2	CMTM8	4439648	4438352	9606.ENSP00000323901	9606.ENSP00000307741	0	0	0	0	0	0	0	0.403	0.403
LOXHD1	CEP41	4437680	4433273	9606.ENSP00000300591	9606.ENSP00000223208	0	0	0	0	0	0	0	0.402	0.402
TLR5	TLR7	4449957	4445433	9606.ENSP00000440643	9606.ENSP00000370034	0	0	0	0.607	0.078	0	0	0.899	0.402
NRG1	PNOC	4447144	4437808	9606.ENSP00000384620	9606.ENSP00000301908	0	0	0	0	0	0	0	0.402	0.402
FAM177B	BEST3	4448736	4440356	9606.ENSP00000414451	9606.ENSP00000332413	0	0	0	0	0	0	0	0.402	0.402
TTN	CREM	4450840	4435595	9606.ENSP00000467141	9606.ENSP00000265372	0	0	0	0	0	0	0	0.402	0.402
PCSK1N	STX1B	4433047	4432855	9606.ENSP00000218230	9606.ENSP00000215095	0	0	0	0	0.116	0	0	0.351	0.402
TNFAIP3	RGS1	4451592	4442888	9606.ENSP00000481570	9606.ENSP00000356429	0	0	0	0	0.187	0	0	0.295	0.402
HDAC2	ASF1B	4449546	4435253	9606.ENSP00000430432	9606.ENSP00000263382	0	0	0	0	0.11	0.157	0	0.266	0.402
ADAM21	RAB19	4451100	4449932	9606.ENSP00000474385	9606.ENSP00000440167	0	0	0	0	0	0	0	0.402	0.402
SCN8A	KCNJ4	4441631	4438228	9606.ENSP00000346534	9606.ENSP00000306497	0	0	0	0	0.157	0.097	0	0.277	0.402
ITGB2	CXCL1	4446737	4446449	9606.ENSP00000380948	9606.ENSP00000379110	0	0	0	0	0.061	0	0	0.389	0.401
PTTG1	CXCR2	4446209	4439296	9606.ENSP00000377536	9606.ENSP00000319635	0	0	0	0	0	0	0	0.401	0.401
FZD5	PLXNA4	4442500	4442296	9606.ENSP00000354607	9606.ENSP00000352882	0	0	0	0	0.051	0	0	0.394	0.401
S1PR5	GNA11	4440026	4432654	9606.ENSP00000328472	9606.ENSP00000078429	0	0	0	0	0	0	0	0.4	0.4
SSC5D	GPR162	4445869	4438704	9606.ENSP00000374274	9606.ENSP00000311528	0	0	0	0	0	0	0	0.4	0.4
HDAC2	CXCL8	4449546	4438229	9606.ENSP00000430432	9606.ENSP00000306512	0	0	0	0	0	0	0	0.4	0.4
RASSF6	CXCR2	4441058	4439296	9606.ENSP00000340578	9606.ENSP00000319635	0	0	0	0	0	0	0	0.401	0.4
NR4A3	NR4A2	4451630	4441430	9606.ENSP00000482027	9606.ENSP00000344479	0	0	0	0.951	0.376	0	0	0.792	0.4
GPR161	IFT81	4449974	4433825	9606.ENSP00000441039	9606.ENSP00000242591	0	0	0	0	0.062	0	0	0.387	0.4
HSPG2	SSPN	4444439	4433829	9606.ENSP00000363827	9606.ENSP00000242729	0	0	0	0	0	0	0	0.4	0.4
C1QC	GAS6	4444427	4440301	9606.ENSP00000363770	9606.ENSP00000331831	0	0	0	0	0.085	0	0	0.371	0.4
TNF	KIR2DL3	4448041	4441235	9606.ENSP00000398698	9606.ENSP00000342215	0	0	0	0	0	0	0	0.4	0.4
HDAC2	DNMT3L	4449546	4435929	9606.ENSP00000430432	9606.ENSP00000270172	0	0	0	0	0	0	0	0.4	0.4
HTRA1	MAPT	4443236	4441081	9606.ENSP00000357980	9606.ENSP00000340820	0	0	0	0	0	0.379	0	0.074	0.4
ADAMTS5	GLI1	4436610	4433423	9606.ENSP00000284987	9606.ENSP00000228682	0	0	0	0	0	0	0	0.4	0.4
ITSN1	EPN3	4445530	4435856	9606.ENSP00000370719	9606.ENSP00000268933	0	0	0	0	0.062	0.195	0	0.27	0.4
CSF2	IL26	4437349	4433445	9606.ENSP00000296871	9606.ENSP00000229134	0	0	0	0	0	0	0	0.4	0.4
TMEM169	SAMD12	4448653	4438918	9606.ENSP00000412524	9606.ENSP00000314173	0	0	0	0	0	0	0	0.4	0.4

## Sheet: Supplementary Table 6
Supplementary Table 6. List of 15 hub DMGs retrieved from PPI network constructed through STRING database
GeneName	Degree	m6A level change
		Foldchange	P_value	FDR	Regulation
CXCL8	48	3.98009	0.000243	0.00447834	down
CXCR4	33	3.23158	1.66e-05	0.000487	down
TLR8	30	3.05352	0.000335	0.00582537	up
CXCL1	30	4.55824	5.37e-07	3.08e-05	down
CXCL2	24	5.00474	8.04e-07	4.15e-05	down
CCR2	22	3.33653	4.7e-07	2.78e-05	up
CXCR2	22	3.24462	5.9e-07	3.29e-05	up
TLR5	20	5.55455	0.000507	0.00812707	up
LPAR1	20	3.41494	1.78e-08	3.16e-06	up
CNR1	19	16.4667	1.93e-05	0.000553	up
PNOC	18	6.08168	5.78e-09	1.51e-06	up
CCR8	16	6.09709	7.51e-05	0.00170388	up
SSTR3	15	3.07784	1.91e-05	0.000546	up
GPER1	15	9.99516	9.6e-08	9.27e-06	up
S1PR5	14	3.04834	1.06e-07	9.92e-06	down

## Sheet: Supplementary Table 7
	Supplementary Table 7. Differentially methylated genes (DMGs) in or near susceptibility loci identified by CAD or Lipid GWAS.
	Chr	DMGs	GeneID	TxStart	TxEnd	PeakID	Score	Peak_length	Transcript_id	Foldchange	P-value	FDR	Regulation	SNP	Position(hg19)	Gene Consequence of SNPs	Distance to DMGs(bp)	Phenotype	References
	chr1	PSRC1	84722	109822381	109822778	diffreps_peak_1576	7.93268	397	NM_032636	2.07726	1.17e-08	2.4e-06	up	rs599839	109822166	PSRC1 : 500B Downstream Variant	10	LDL; TC; CAD; Stroke	PMID: 31217584; PMID: 30718733; PMID: 29507422; PMID: 29351605; PMID: 24262325; PMID: 21378990; PMID: 18262040; PMID: 18193043; PMID: 18179892; PMID: 17634449
														rs602633	109821511		665	CAD; AAA	PMID: 29212778; PMID: 24262325; PMID: 27899403
														rs3902354	109819296		2880	LDL; TC	PMID: 31217584; PMID: 29507422
				109823561	109823873	diffreps_peak_1577	3.55978	312	ENST00000409138	2.21905	0.000275565	0.00497138	up	rs646776	109818530	CELSR2 : 500B Downstream Variant	3646	LDL; TC; CAD; AMI	PMID: 31217584; PMID: 30926973; PMID: 30911093; PMID: 29507422; PMID: 28714974; PMID: 25961943; PMID: 21378988; PMID: 21239051; PMID: 19198609; PMID: 19060911; PMID: 19060910; PMID: 18193044
														rs12740374	109817590	CELSR2 : 3 Prime UTR Variant	4586	LDL; TC; CAD	PMID: 31675503; PMID: 31393916; PMID: 31217584; PMID: 30718733; PMID: 29507422; PMID: 21347282; PMID: 19060906; PMID: 30595370; PMID: 30104761; PMID: 29212778
														rs629301	109818306		3870	LDL; TC	PMID: 31217584; PMID:30926973; PMID:29507422; PMID:26690388; PMID:24097068; PMID:20686565
														rs660240	109817838		4338	LDL; TC; CAD; HF	PMID: 31919418; PMID: 31217584; PMID: 29507422; PMID: 29403010; PMID: 26780889; PMID: 20864672; PMID: 21943158
	chr3	MRAS	22808	138122081	138122320	diffreps_peak_23304	4.80045	239	NM_012219	2.62487	1.58e-05	0.00046746	up	rs2306374	138119952	MRAS : Intron Variant	Inside	CAD	PMID: 21378990
														rs185244	138092889				PMID: 29212778
				138122621	138122820	diffreps_peak_23305	1.46463	199		2.23922	0.0343062	0.211805	up	rs3732837	138121920	MRAS : 3 Prime UTR Variant
														rs9818870	138122122				PMID: 30595370; PMID: 24262325; PMID: 19198612
														rs9864898	138111751	MRAS : Intron Variant		Blood pressure	PMID: 27841878
	chr3	ARHGEF26	26084	153839881	153840160	diffreps_peak_23488	2.24329	279	NM_015595	6.97872	0.00571103	0.0545312	up	rs12493885	153839866	ARHGEF26 : Missense Variant	Inside	CAD	PMID: 29212778; PMID: 28714975; PMID: 28714974
														rs357489	153884517	ARHGEF26 : Intron Variant		Blood pressure	PMID: 30578418
	chr3	IFT80	57560	160095620	160095678	diffreps_peak_23570	3.02532	58	ENST00000468218	19.1	0.000943372	0.013334	down	rs10513551	160086055	IFT80 : Intron Variant	Inside	LDL	PMID: 30275531
														rs56394279	160171092	TRIM59-IFT80 : Intron Variant	3466		PMID: 29507422
	chr8	TRIB1	10221	126442562	126443504	diffreps_peak_33738	2.49024	942	NM_025195	2.09957	0.00323418	0.0351633	up	rs2001945	126477978		27334	TG; TC; LDL	PMID: 31217584; PMID: 21909109
														rs2001846	126478450		27806	LDL; MI	PMID: 30275531; PMID: 29403010; PMID: 26343387
														rs6982502	126479362		28718	CAD	PMID: 29212778
														rs2980875	126481747		31103	LDL	PMID: 29507422
														rs2954021	126482077		31433		PMID: 31217584; PMID: 30698716; PMID: 29507422; PMID: 20864672
				126445558	126445851	diffreps_peak_33739	2.21131	293		2.02093	0.00614733	0.0576927	up	rs2954022	126482621		31977		PMID: 30926973; PMID: 29507422
														rs17321515	126486409		35765		PMID: 31217584
														rs2954031	126491733		41089		PMID: 31217584; PMID: 29507422
														rs2954029	126490972		40328	LDL; CAD	PMID: 30926973; PMID: 29507422; PMID: 24097068; PMID: 20686565; PMID: 29212778; PMID: 28714975; PMID: 28334899; PMID: 26343387
	chr11	PHLDB1	23187	118501923	118502196	diffreps_peak_6648	3.16619	273	NM_015157	2.84637	0.000682038	0.0102957	up	rs506234	118540104	TREH : Intron Variant	11356	LDL	PMID: 30275531
														rs11603023	118486067	PHLDB1 : Intron Variant	Inside	TC	PMID: 24097068
				118527392	118527580	diffreps_peak_6649	1.9343	188		6.62069	0.0116333	0.0940853	up	rs12225399	118480285				PMID: 30275531
														rs17122278	118449370	ARCN1 : Intron Variant	28936		PMID: 29351605
	chr11	FADS1	3992	61571201	61571640	diffreps_peak_5901	6.86758	439	ENST00000460649	2.05596	1.36e-07	1.18e-05	down	rs174549	61571382	FADS1 : Intron Variant	Inside	LDL	PMID: 30275531
														rs174546	61569830	FADS1 : 3 Prime UTR Variant		TG; TC; LDL	PMID: 31217584; PMID: 30926973; PMID: 29507422; PMID: 26690388; PMID: 24097068; PMID: 20686565; PMID: 19060910
														rs174547	61570783	FADS1 : Intron Variant			PMID: 31217584; PMID: 29615537; PMID: 19060906
														rs174548	61571348				PMID: 31217584; PMID: 20864672
														rs174550	61571478				PMID: 29507422; PMID: 28334899
														rs174551	61573684				PMID: 31217584; PMID: 29507422; PMID: 29403010; PMID: 25961943
														rs174554	61579463				PMID: 31217584; PMID: 29507422; PMID: 25961943
	chr13	FLT1	2321	28963861	28964241	diffreps_peak_8894	2.80158	380	NM_001159920	2.58957	0.00157912	0.0200754	up	rs9319428	28973621	FLT1 : Intron Variant	Inside	CAD	PMID: 29212778
														rs9508025	28984063				PMID: 23364394
				28971096	28971205	diffreps_peak_8895	1.57154	109	NM_002019	12.1	0.0268199	0.176117	up	rs9513112	28997702				PMID: 29212778
														rs1924981	29022645				PMID: 28714975
	chr14	SERPINA1	5265	94849301	94849716	diffreps_peak_10671	4.72444	415	ENST00000556091	2.01144	1.89e-05	0.000541084	up	rs28929474	94844947	SERPINA1 : Missense Variant	Inside	LDL	PMID: 29083408
				94854896	94855020	diffreps_peak_10672	5.89794	124	NM_000295	2.32328	1.2649e-06	5.87203e-05	up	rs6647	94847415			Stroke	PMID: 28265093
				94856756	94857029	diffreps_peak_10674	3.92133	273	NM_001127700	2.22791	0.000119859	0.00251629	up	rs17580	94847262			LDL; TC	PMID: 30275531; PMID: 29507422
														rs112635299	94838142		4942	CAD	PMID: 29212778
	chr16	OSGIN1	29948	83981901	83981937	diffreps_peak_13024	4.53316	36	ENST00000561552	5.17699	2.93e-05	0.000782028	up	rs67890964	83979317	LOC105371371 : Intron Variant	3355	LDL; TC	PMID: 29507422
														rs28555129	83984776	LOC105371371 : Missense Variant	Inside	LDL	PMID: 30275531
	chr19	ANGPTL4	51129	8431161	8431203	diffreps_peak_15386	2.79033	42	NM_139314	21.6	0.00162059	0.0204899	up	rs116843064	8429323	ANGPTL4 : Missense Variant	Inside	TG; CAD	PMID: 30698716; PMID: 30275531; PMID: 29507422; PMID: 25961943; PMID: 24507774; PMID: 27036123; PMID: 29084231; PMID: 29212778; PMID: 28714975
	chr19	FUT2	2524	49206221	49206460	diffreps_peak_16280	2.87763	239	NM_000511	3.88947	0.00132548	0.0174776	up	rs679574	49206108	FUT2 : Intron Variant	Inside	LDL	PMID: 30275531
														rs516246	49206172			TG; TC; LDL; CAD	PMID: 30595370; PMID: 29507422
														rs492602	49206417	FUT2 : Synonymous Variant			PMID: 30926973; PMID: 29507422; PMID: 28369058; PMID: 24097068; PMID: 20686565
														rs2452170	49213504		4313	TG; TC; LDL	PMID: 29507422
	Position is reported in human genome build hg19. Abbreviations: GWAS, Genome-wide association studies; CAD, Coronary artery disease; chr, chromosome; HF, Heart failure; TG, Triglyceride; LDL, Low density lipoprotein; TC, Total cholesterol; AAA, Abdominal aortic aneurysm; MI, Myocardial infarction; FDR; False discovery rate

## Sheet: Supplementary Table 8
Supplementary Table 8. The list of genes with significant change in both m6A level and mRNA transcript abundance in CAD group
GeneName	GeneID	Pattern	chrom	Transcript ID	m6A level change						mRNA level change
					PeakID	Peak start	Peak end	Foldchange	P-value	FDR	strand	locus	Fold change	P-value	FDR
FAM114A1	92689	Hyper-up	chr4	NM_138389	diffreps_peak_24463	38945081	38945360	67.8	5.23386e-09	1.42e-06	+	chr4:38869297-38947360	3.56208	0.0008	0.03242
HES1	3280	Hypo-down	chr3	NM_005524	diffreps_peak_23898	193853930	193854040	23.4833	3.68157e-08	5.07e-06	+	chr3:193853933-193856521	-14.0581	5e-05	0.00352391
NR4A3	8013	Hypo-down	chr9	NM_006981	diffreps_peak_35278	102587940	102588114	18.3157	2.33788e-07	1.7e-05	+	chr9:102584136-102629173	-10.3661	5e-05	0.00352391
KCTD3	51133	Hyper-up	chr1	NM_016121	diffreps_peak_3134	215794961	215795149	17.7	0.00378516	0.0395214	+	chr1:215740734-215795149	1.84505	0.015	0.239664
NR4A3	8013	Hypo-down	chr9	NM_006981	diffreps_peak_35279	102590341	102590800	17.105	5.30478e-07	3.05e-05	+	chr9:102584136-102629173	-10.3661	5e-05	0.00352391
LGR6	59352	Hypo-down	chr1	NM_001017403	diffreps_peak_2933	202163117	202163280	14	2.78531e-09	9.2e-07	+	chr1:202163028-202288909	-2.53838	5e-05	0.00352391
KIF19	124602	Hypo-down	chr17	NM_153209	diffreps_peak_14211	72343961	72344038	13.9242	1.57617e-08	2.91e-06	+	chr17:72322348-72351959	-3.8019	5e-05	0.00352391
WNT5B	81029	Hyper-up	chr12	NM_032642	diffreps_peak_6918	1756121	1756378	13.5429	2.44951e-08	3.91e-06	+	chr12:1639056-1756409	3.55798	0.0161	0.249417
NR4A3	8013	Hypo-down	chr9	NM_006981	diffreps_peak_35277	102584136	102584360	12.6261	1.19422e-07	1.08e-05	+	chr9:102584136-102629173	-10.3661	5e-05	0.00352391
B3GNT7	93010	Hypo-down	chr2	NM_145236	diffreps_peak_19471	232262501	232262700	11.2825	2.70429e-07	1.87e-05	+	chr2:232260253-232265875	-10.0728	5e-05	0.00352391
RNASE1	6035	Hyper-up	chr14	NM_002933	diffreps_peak_9714	21270161	21270252	10.2121	4.093e-06	0.000152501	-	chr14:21269386-21271437	8.66728	0.00025	0.0135083
GPER1	2852	Hyper-up	chr7	NM_001505	diffreps_peak_30560	1132601	1132920	9.99516	9.60441e-08	9.27e-06	+	chr7:1036621-1177896	5.52893	0.0056	0.130528
FAM20A	54757	Hyper-up	chr17	NM_017565	diffreps_peak_14146	66596621	66596960	9.6071	6.4649e-07	3.52e-05	-	chr17:66255322-66760023	5.00399	0.016	0.248299
SHROOM1	134549	Hyper-up	chr5	NM_133456	diffreps_peak_27673	132158941	132159060	9.21311	2.3665e-08	3.82e-06	-	chr5:132157832-132166590	5.53054	0.00015	0.00900556
SH3PXD2B	285590	Hyper-up	chr5	NM_001017995	diffreps_peak_28093	171777366	171777380	9.08	3.28434e-07	2.14e-05	-	chr5:171752184-171881527	2.71379	0.00405	0.10466
TNFSF9	8744	Hypo-down	chr19	NM_003811	diffreps_peak_15330	6531161	6531314	8.60759	1.55421e-06	6.93e-05	+	chr19:6531009-6535931	-2.49651	0.01885	0.269538
PPP1R26	9858	Hyper-up	chr9	ENST00000605660	diffreps_peak_35867	138376237	138376420	8.15686	5.47427e-05	0.00131069	+	chr9:138354572-138380739	1.75463	0.01235	0.21154
B3GNT7	93010	Hypo-down	chr2	NM_145236	diffreps_peak_19472	232262961	232263580	8.15262	7.69927e-07	4.01e-05	+	chr2:232260253-232265875	-10.0728	5e-05	0.00352391
RGS1	5996	Hypo-down	chr1	NM_002922	diffreps_peak_2823	192548601	192548880	8.07362	1.4033e-06	6.39e-05	+	chr1:192544856-192549161	-4.41398	5e-05	0.00352391
SH3PXD2B	285590	Hyper-up	chr5	NM_001017995	diffreps_peak_28087	171764961	171765180	7.93827	1.01331e-07	9.64e-06	-	chr5:171752184-171881527	2.71379	0.00405	0.10466
B3GNT7	93010	Hypo-down	chr2	NM_145236	diffreps_peak_19473	232264041	232264340	7.86652	2.13829e-07	1.6e-05	+	chr2:232260253-232265875	-10.0728	5e-05	0.00352391
SH3PXD2B	285590	Hyper-up	chr5	NM_001017995	diffreps_peak_28092	171773241	171773265	7.65672	2.79751e-07	1.92e-05	-	chr5:171752184-171881527	2.71379	0.00405	0.10466
ITGA7	3679	Hyper-up	chr12	NM_002206	diffreps_peak_7827	56078641	56078880	7.19118	0.000195545	0.00375375	-	chr12:56075329-56118526	1.81999	0.04485	0.445527
ANKRD34B	340120	Hyper-up	chr5	NM_001004441	diffreps_peak_27009	79854841	79855220	7.1	8.53557e-08	8.61e-06	-	chr5:79852573-79866307	4.11927	0.00155	0.0528452
NR4A2	4929	Hypo-down	chr2	NM_006186	diffreps_peak_18603	157183229	157183300	6.76744	1.03404e-06	5.03e-05	-	chr2:157180943-157198860	-4.48544	5e-05	0.00352391
CREM	1390	Hypo-down	chr10	NM_182717	diffreps_peak_4025	35500181	35500500	6.72772	6.82016e-07	3.66e-05	+	chr10:35386933-35501886	-3.43248	5e-05	0.00352391
B3GNT7	93010	Hypo-down	chr2	NM_145236	diffreps_peak_19469	232260334	232260525	6.62353	6.67048e-08	7.35e-06	+	chr2:232260253-232265875	-10.0728	5e-05	0.00352391
LAMA5	3911	Hyper-up	chr20	uc021wfw.1	diffreps_peak_20401	60901921	60902022	6.53333	0.019444	0.13857	-	chr20:60877148-60942368	3.9982	0.00125	0.0450278
GPER1	2852	Hyper-up	chr7	NM_001505	diffreps_peak_30561	1133121	1133451	6.53023	1.37615e-07	1.19e-05	+	chr7:1036621-1177896	5.52893	0.0056	0.130528
RGS1	5996	Hypo-down	chr1	NM_002922	diffreps_peak_2822	192548266	192548560	6.49161	2.01477e-06	8.54e-05	+	chr1:192544856-192549161	-4.41398	5e-05	0.00352391
FAM129B	64855	Hypo-up	chr9	NM_022833	diffreps_peak_35725	130267616	130267620	6.32857	5.47445e-05	0.00131069	-	chr9:130267617-130341268	1.55732	0.02455	0.317902
SHROOM1	134549	Hyper-up	chr5	NM_001172700	diffreps_peak_27675	132166285	132166440	6.25161	2.08485e-06	8.76e-05	-	chr5:132157832-132166590	5.53054	0.00015	0.00900556
SH3PXD2B	285590	Hyper-up	chr5	NM_001017995	diffreps_peak_28086	171761661	171761880	6.23824	6.86195e-08	7.5e-06	-	chr5:171752184-171881527	2.71379	0.00405	0.10466
FAM20A	54757	Hyper-up	chr17	NM_017565	diffreps_peak_14147	66596981	66597095	6.1958	4.11188e-07	2.53e-05	-	chr17:66255322-66760023	5.00399	0.016	0.248299
CCR8	1237	Hyper-up	chr3	NM_005201	diffreps_peak_22104	39373808	39373940	6.09709	7.50944e-05	0.00170388	+	chr3:39371196-39375171	3.09575	0.01415	0.230209
NRG1	3084	Hyper-up	chr8	NM_013956	diffreps_peak_32913	32621301	32621880	6.07501	3.86679e-06	0.000145582	+	chr8:31496901-32622548	3.29672	5e-05	0.00352391
NR4A2	4929	Hypo-down	chr2	NM_006186	diffreps_peak_18602	157181981	157182512	6.00885	5.83993e-06	0.000204011	-	chr2:157180943-157198860	-4.48544	5e-05	0.00352391
SOCS3	9021	Hyper-up	chr17	NM_003955	diffreps_peak_14315	76354521	76354920	5.94357	2.75043e-05	0.00074109	-	chr17:76352863-76356158	4.26776	5e-05	0.00352391
KCNJ15	3772	Hyper-up	chr21	NM_002243	diffreps_peak_20744	39673681	39673746	5.89423	3.77611e-10	2.3e-07	+	chr21:39493544-39679279	3.64162	5e-05	0.00352391
KCNJ15	3772	Hyper-up	chr21	NM_001276437	diffreps_peak_20733	39601836	39601860	5.84848	0.0116333	0.0940853	+	chr21:39493544-39679279	3.64162	5e-05	0.00352391
HBA2	3040	Hyper-up	chr16	NM_000517	diffreps_peak_12126	222845	222980	5.70443	4.14983e-06	0.000154082	+	chr16:222845-223709	3.42238	5e-05	0.00352391
KCNJ15	3772	Hyper-up	chr21	ENST00000443341	diffreps_peak_20738	39639220	39639264	5.69072	8.89254e-08	8.85e-06	+	chr21:39493544-39679279	3.64162	5e-05	0.00352391
NRG1	3084	Hyper-up	chr8	NM_013959	diffreps_peak_32896	32505141	32505520	5.68322	5.11686e-08	6.25e-06	+	chr8:31496901-32622548	3.29672	5e-05	0.00352391
HS1BP3	64342	Hypo-up	chr2	NM_022460	diffreps_peak_16877	20850791	20850864	5.62963	0.023924	0.161739	-	chr2:20760207-20850849	1.52772	0.0147	0.236567
SH3PXD2B	285590	Hyper-up	chr5	NM_001017995	diffreps_peak_28088	171765941	171766500	5.60684	4.03126e-07	2.49e-05	-	chr5:171752184-171881527	2.71379	0.00405	0.10466
TLR5	7100	Hyper-up	chr1	NM_003268	diffreps_peak_3261	223316537	223316624	5.55455	0.000506665	0.00812707	-	chr1:223282747-223316624	2.60644	5e-05	0.00352391
SH3PXD2B	285590	Hyper-up	chr5	NM_001017995	diffreps_peak_28089	171766561	171766920	5.52369	3.37269e-07	2.18e-05	-	chr5:171752184-171881527	2.71379	0.00405	0.10466
RPGRIP1	57096	Hyper-up	chr14	NM_020366	diffreps_peak_9729	21795781	21795960	5.48485	0.0201887	0.142388	+	chr14:21756097-21819460	2.59391	0.00105	0.0394991
ANKRD34B	340120	Hyper-up	chr5	NM_001004441	diffreps_peak_27008	79854621	79854820	5.38866	1.06139e-07	9.94e-06	-	chr5:79852573-79866307	4.11927	0.00155	0.0528452
ATP10D	57205	Hyper-up	chr4	NM_020453	diffreps_peak_24537	47594901	47595140	5.38298	0.00935063	0.0796548	+	chr4:47487304-47595503	1.55256	0.01815	0.26419
CACNA2D2	9254	Hypo-down	chr3	NM_006030	diffreps_peak_22356	50412167	50412244	5.27039	6.29703e-10	3.16e-07	-	chr3:50384760-50541675	-2.25085	0.00505	0.122847
ZNF2	7549	Hyper-up	chr2	NM_001291604	diffreps_peak_17895	95848361	95848640	5.11429	0.00356879	0.0378497	+	chr2:95831176-95850065	2.05164	0.0216	0.294688
ALPL	249	Hyper-up	chr1	NM_000478	diffreps_peak_315	21894596	21894700	5.10615	3.26264e-05	0.000853612	+	chr1:21835857-21904905	3.0689	0.0009	0.0354258
ARHGEF10	9639	Hyper-up	chr8	uc010lrd.2	diffreps_peak_32550	1818421	1818740	5.04698	0.000194307	0.00373385	+	chr8:1772141-1906807	2.54058	0.00035	0.0176295
CXCL2	2920	Hypo-down	chr4	NM_002089	diffreps_peak_24755	74964781	74964997	5.00474	8.0437e-07	4.15e-05	-	chr4:74962751-74965010	-4.66368	5e-05	0.00352391
SMAD7	4092	Hypo-down	chr18	ENST00000586093	diffreps_peak_14870	46474753	46474875	4.99082	1.92432e-07	1.48e-05	-	chr18:46446222-46477081	-2.86664	5e-05	0.00352391
HSPG2	3339	Hyper-down	chr1	NM_005529	diffreps_peak_319	22157474	22157500	4.98571	0.00257275	0.0294073	-	chr1:22138757-22263790	-1.89583	0.0401	0.417654
TNFRSF10C	8794	Hyper-up	chr8	NM_003841	diffreps_peak_32764	22974901	22974950	4.97568	1.06653e-06	5.15e-05	+	chr8:22941867-22974950	3.61003	5e-05	0.00352391
KCNJ15	3772	Hyper-up	chr21	NM_002243	diffreps_peak_20743	39671681	39672540	4.95205	2.95761e-07	1.99e-05	+	chr21:39493544-39679279	3.64162	5e-05	0.00352391
NLRP2	55655	Hypo-down	chr19	NM_017852	diffreps_peak_16512	55494881	55495080	4.92169	2.54764e-05	0.000695055	+	chr19:55434876-55512510	-2.0998	0.015	0.239664
NETO1	81832	Hyper-up	chr18	ENST00000579169	diffreps_peak_15075	70533978	70534266	4.92121	2.88068e-08	4.33e-06	-	chr18:70409548-70535381	4.22031	0.00015	0.00900556
SOGA1	140710	Hyper-up	chr20	NM_080627	diffreps_peak_20145	35492081	35492087	4.91429	0.00273471	0.0308369	-	chr20:35405844-35492089	1.75721	0.00015	0.00900556
EGR1	1958	Hyper-up	chr5	NM_001964	diffreps_peak_27739	137802445	137803400	4.90478	1.00584e-05	0.000320339	+	chr5:137801178-137805004	4.1209	5e-05	0.00352391
NR4A2	4929	Hypo-down	chr2	NM_006186	diffreps_peak_18604	157186121	157186540	4.9002	4.97461e-06	0.00017847	-	chr2:157180943-157198860	-4.48544	5e-05	0.00352391
MICAL2	9645	Hyper-up	chr11	NM_014632	diffreps_peak_5412	12132122	12132240	4.87815	3.19197e-06	0.00012429	+	chr11:12115542-12285334	1.50118	0.0132	0.22059
LRG1	116844	Hyper-up	chr19	NM_052972	diffreps_peak_15286	4538321	4538580	4.84227	1.11992e-06	5.36e-05	-	chr19:4522542-4540486	2.60792	0.0016	0.0541359
CHL1	10752	Hyper-up	chr3	NM_006614	diffreps_peak_21665	447261	447520	4.83654	0.000450609	0.00740539	+	chr3:237440-451090	4.25556	0.0079	0.159711
RGS1	5996	Hypo-down	chr1	NM_002922	diffreps_peak_2821	192544856	192545020	4.83312	9.7527e-07	4.8e-05	+	chr1:192544856-192549161	-4.41398	5e-05	0.00352391
ANKRD34B	340120	Hyper-up	chr5	uc010jam.3	diffreps_peak_27012	79864778	79864940	4.82143	0.00339913	0.036481	-	chr5:79852573-79866307	4.11927	0.00155	0.0528452
GCNT2	2651	Hyper-up	chr6	NM_145655	diffreps_peak_28476	10586761	10587000	4.79817	5.39664e-09	1.45e-06	+	chr6:10492455-10629601	1.97838	0.00035	0.0176295
KIF19	124602	Hypo-down	chr17	NM_153209	diffreps_peak_14213	72348081	72348276	4.78271	1.01655e-07	9.65e-06	+	chr17:72322348-72351959	-3.8019	5e-05	0.00352391
DUSP8	1850	Hypo-down	chr11	NM_004420	diffreps_peak_5183	1577561	1578804	4.77769	1.23014e-06	5.75e-05	-	chr11:1575273-1620414	-4.79925	5e-05	0.00352391
NRG1	3084	Hyper-up	chr8	NM_013959	diffreps_peak_32897	32505581	32505780	4.72988	1.27731e-07	1.13e-05	+	chr8:31496901-32622548	3.29672	5e-05	0.00352391
MARCO	8685	Hyper-up	chr2	NM_006770	diffreps_peak_18233	119739196	119739232	4.72671	5.18562e-08	6.31e-06	+	chr2:119699741-119752236	2.06154	0.00105	0.0394991
AVPI1	60370	Hypo-down	chr10	NM_021732	diffreps_peak_4718	99446581	99446780	4.65092	4.23491e-09	1.22e-06	-	chr10:99437180-99447080	-4.17166	0.0001	0.0065797
FCGR1B	2210	Hyper-up	chr1	NM_001004340	diffreps_peak_1820	120926861	120927280	4.61325	2.67076e-06	0.000107513	-	chr1:120876494-120935937	3.24356	0.0001	0.0065797
LRG1	116844	Hyper-up	chr19	NM_052972	diffreps_peak_15285	4537961	4538300	4.56902	1.27405e-06	5.9e-05	-	chr19:4522542-4540486	2.60792	0.0016	0.0541359
CXCL1	2919	Hypo-down	chr4	NM_001511	diffreps_peak_24753	74735108	74735287	4.55824	5.36527e-07	3.08e-05	+	chr4:74735108-74737019	-5.73511	0.02615	0.330461
CD180	4064	Hyper-up	chr5	NM_005582	diffreps_peak_26809	66478103	66478600	4.55742	2.62348e-10	1.78e-07	-	chr5:66478102-66492627	2.51593	5e-05	0.00352391
ARHGAP42	143872	Hypo-down	chr11	NM_152432	diffreps_peak_6466	100846787	100846900	4.5082	0.0197738	0.140148	+	chr11:100554892-100862668	-2.92343	0.00715	0.149638
FZD2	2535	Hyper-up	chr17	NM_001466	diffreps_peak_13854	42636661	42636920	4.49708	1.25383e-07	1.12e-05	+	chr17:42634924-42636907	2.74274	0.00115	0.042367
HTRA1	5654	Hyper-up	chr10	NM_002775	diffreps_peak_4987	124266206	124266401	4.49515	0.000169753	0.00334868	+	chr10:124221040-124274424	3.37313	0.01315	0.21996
GAS6	2621	Hyper-up	chr13	NM_000820	diffreps_peak_9673	114566921	114567076	4.47368	0.0024109	0.0279545	-	chr13:114518582-114567046	2.23383	0.0101	0.188975
TNFAIP3	7128	Hypo-down	chr6	NM_006290	diffreps_peak_30034	138192349	138192500	4.45706	9.75526e-06	0.000312094	+	chr6:138144809-138204449	-3.5552	5e-05	0.00352391
F2RL1	2150	Hyper-up	chr5	NM_005242	diffreps_peak_26949	76129581	76130160	4.40143	8.95997e-08	8.89e-06	+	chr5:76114757-76131140	3.95728	5e-05	0.00352391
SIK1	150094	Hypo-down	chr21	NM_173354	diffreps_peak_20832	44837422	44837540	4.39856	3.42541e-07	2.21e-05	-	chr21:44834394-44847008	-2.74212	0.0007	0.0292998
COL6A2	1292	Hypo-down	chr21	NM_001849	diffreps_peak_20961	47536683	47536728	4.38993	6.17234e-09	1.58e-06	+	chr21:47518010-47552763	-1.96963	0.00015	0.00900556
SIK1	150094	Hypo-down	chr21	NM_173354	diffreps_peak_20833	44846889	44847002	4.37413	3.55599e-07	2.27e-05	-	chr21:44834394-44847008	-2.74212	0.0007	0.0292998
HBA1	3039	Hyper-up	chr16	NM_000558	diffreps_peak_12128	226649	226780	4.33866	4.30234e-06	0.00015853	+	chr16:226678-227521	3.10687	5e-05	0.00352391
ERRFI1	54206	Hypo-down	chr1	NM_018948	diffreps_peak_149	8073921	8074420	4.33725	3.59025e-08	4.99e-06	-	chr1:8064463-8086368	-3.33864	0.0005	0.0234003
TNF	7124	Hypo-down	chr6	uc003nuj.3	diffreps_peak_28806	31544291	31544320	4.33321	8.76787e-06	0.00028551	+	chr6:31543343-31546113	-2.22948	5e-05	0.00352391
TNFAIP3	7128	Hypo-down	chr6	NM_006290	diffreps_peak_30036	138202201	138202440	4.32207	1.95661e-06	8.34e-05	+	chr6:138144809-138204449	-3.5552	5e-05	0.00352391
TNFAIP3	7128	Hypo-down	chr6	NM_006290	diffreps_peak_30037	138202581	138202960	4.31967	7.62561e-06	0.000254047	+	chr6:138144809-138204449	-3.5552	5e-05	0.00352391
NETO1	81832	Hyper-up	chr18	NM_138966	diffreps_peak_15076	70534581	70534810	4.29048	7.21863e-05	0.00164865	-	chr18:70409548-70535381	4.22031	0.00015	0.00900556
EGR1	1958	Hyper-up	chr5	NM_001964	diffreps_peak_27738	137801180	137801757	4.27428	2.61263e-06	0.000105683	+	chr5:137801178-137805004	4.1209	5e-05	0.00352391
CCR2	729230	Hyper-up	chr3	NM_001123396	diffreps_peak_22270	46400481	46400680	4.27194	2.66441e-06	0.000107353	+	chr3:46395224-46402419	3.14563	5e-05	0.00352391
AVPI1	60370	Hypo-down	chr10	NM_021732	diffreps_peak_4716	99437281	99437540	4.26102	1.0047e-07	9.59e-06	-	chr10:99437180-99447080	-4.17166	0.0001	0.0065797
GSTM4	2948	Hyper-up	chr1	NM_147148	diffreps_peak_1594	110208021	110208123	4.25764	6.70609e-05	0.00155021	+	chr1:110198702-110208118	1.80646	0.0318	0.36796
DHRS9	10170	Hyper-up	chr2	NM_199204	diffreps_peak_18753	169938032	169938404	4.25299	4.13817e-09	1.2e-06	+	chr2:169921298-169952677	2.15394	0.01335	0.221853
MXRA7	439921	Hypo-down	chr17	NM_001008528	diffreps_peak_14273	74670821	74671080	4.25243	1.67969e-07	1.36e-05	-	chr17:74668009-74707098	-2.29749	5e-05	0.00352391
MYO7B	4648	Hypo-up	chr2	NM_001080527	diffreps_peak_18323	128370050	128370178	4.22917	0.00912494	0.078131	+	chr2:128293377-128395304	2.31056	0.01855	0.267609
AVPI1	60370	Hypo-down	chr10	NM_021732	diffreps_peak_4717	99437561	99437760	4.2113	9.49465e-08	9.21e-06	-	chr10:99437180-99447080	-4.17166	0.0001	0.0065797
FCGR1A	2209	Hyper-up	chr1	NM_000566	diffreps_peak_2042	149762881	149763380	4.20767	4.22949e-06	0.000156455	+	chr1:149754226-149783928	2.92622	0.01115	0.198221
HTRA1	5654	Hyper-up	chr10	NM_002775	diffreps_peak_4988	124273721	124274100	4.20501	1.13092e-07	1.04e-05	+	chr10:124221040-124274424	3.37313	0.01315	0.21996
FAM198B	51313	Hyper-up	chr4	NM_016613	diffreps_peak_25908	159091621	159092420	4.17895	2.1966e-05	0.000614486	-	chr4:159045625-159176563	2.53079	5e-05	0.00352391
ABCC6	368	Hyper-up	chr16	NM_001171	diffreps_peak_12379	16276268	16276360	4.13333	0.000906905	0.0129173	-	chr16:16242784-16318118	2.42592	0.027	0.336352
SH2D2A	9047	Hypo-down	chr1	NM_003975	diffreps_peak_2210	156779541	156779599	4.10836	1.394e-06	6.36e-05	-	chr1:156776034-156851642	-3.13657	5e-05	0.00352391
NR4A2	4929	Hypo-down	chr2	NM_006186	diffreps_peak_18605	157189021	157189287	4.0991	1.52811e-06	6.85e-05	-	chr2:157180943-157198860	-4.48544	5e-05	0.00352391
OSM	5008	Hypo-down	chr22	NM_020530	diffreps_peak_21253	30662754	30662829	4.09595	3.89502e-07	2.43e-05	-	chr22:30658817-30662829	-4.24349	5e-05	0.00352391
CDC42EP1	11135	Hyper-up	chr22	NM_152243	diffreps_peak_21404	37956470	37956595	4.07155	3.19867e-08	4.64e-06	+	chr22:37956453-37965412	2.74259	0.00635	0.138758
TNFAIP3	7128	Hypo-down	chr6	NM_001270508	diffreps_peak_30033	138188324	138188679	4.07129	1.18969e-05	0.000369119	+	chr6:138144809-138204449	-3.5552	5e-05	0.00352391
RETN	56729	Hyper-up	chr19	NM_020415	diffreps_peak_15377	7735121	7735340	4.0501	1.83733e-05	0.000529524	+	chr19:7733929-7735334	4.58681	5e-05	0.00352391
GPR162	27239	Hyper-up	chr12	NM_014449	diffreps_peak_7010	6932633	6932820	4.02522	4.85356e-08	6.04e-06	+	chr12:6930710-6949018	2.53854	0.00195	0.062876
FZD5	7855	Hyper-up	chr2	NM_003468	diffreps_peak_19253	208632021	208632560	4.02128	1.38642e-07	1.2e-05	-	chr2:208627309-208634287	2.55356	0.00025	0.0135083
DSC2	1824	Hyper-up	chr18	NM_004949	diffreps_peak_14662	28681865	28682100	4.00262	0.000368122	0.00629537	-	chr18:28645939-28742819	2.90235	5e-05	0.00352391
SLC1A3	6507	Hyper-up	chr5	NM_004172	diffreps_peak_26457	36687081	36687280	4	0.00340724	0.0365479	+	chr5:36606456-36725297	3.77328	5e-05	0.00352391
TNFRSF10C	8794	Hyper-up	chr8	NM_003841	diffreps_peak_32763	22974153	22974800	3.99751	2.84827e-06	0.000113369	+	chr8:22941867-22974950	3.61003	5e-05	0.00352391
GAS6	2621	Hyper-up	chr13	NM_000820	diffreps_peak_9662	114549499	114549562	3.99594	2.12535e-10	1.55e-07	-	chr13:114518582-114567046	2.23383	0.0101	0.188975
ADM	133	Hyper-up	chr11	NM_001124	diffreps_peak_5384	10327881	10328080	3.96974	7.90879e-07	4.09e-05	+	chr11:10326226-10328944	3.76973	5e-05	0.00352391
CISH	1154	Hyper-up	chr3	NM_013324	diffreps_peak_22378	50644501	50645573	3.95882	8.55883e-09	1.98e-06	-	chr3:50643920-50686720	2.94983	0.00335	0.0917571
DUSP8	1850	Hypo-down	chr11	NM_004420	diffreps_peak_5182	1576101	1576400	3.9337	2.16809e-07	1.61e-05	-	chr11:1575273-1620414	-4.79925	5e-05	0.00352391
OSM	5008	Hypo-down	chr22	NM_020530	diffreps_peak_21250	30659781	30660340	3.93154	2.09626e-06	8.8e-05	-	chr22:30658817-30662829	-4.24349	5e-05	0.00352391
SHROOM1	134549	Hyper-up	chr5	NM_133456	diffreps_peak_27674	132160921	132161780	3.90108	1.57345e-06	7e-05	-	chr5:132157832-132166590	5.53054	0.00015	0.00900556
PLXNB1	5364	Hyper-up	chr3	NM_002673	diffreps_peak_22307	48461221	48461480	3.88435	0.0018893	0.0231084	-	chr3:48445260-48471594	1.96526	0.01695	0.256989
MYO7B	4648	Hyper-up	chr2	ENST00000389524	diffreps_peak_18326	128389168	128389328	3.88116	1.45826e-09	5.78e-07	+	chr2:128293377-128395304	2.31056	0.01855	0.267609
CR1	1378	Hyper-up	chr1	uc009xck.1	diffreps_peak_3043	207743441	207743640	3.875	0.000172281	0.0033882	+	chr1:207669491-207813992	2.73437	5e-05	0.00352391
NLRC4	58484	Hyper-up	chr2	NM_021209	diffreps_peak_17047	32474901	32475240	3.87474	8.89427e-08	8.85e-06	-	chr2:32449521-32490923	2.88504	5e-05	0.00352391
TRIM7	81786	Hyper-up	chr5	NM_203293	diffreps_peak_28215	180621101	180621720	3.85694	1.70109e-09	6.4e-07	-	chr5:180618923-180632293	2.48618	0.0185	0.267609
SLITRK4	139065	Hyper-up	chrX	NM_173078	diffreps_peak_37463	142717301	142717500	3.85127	1.9687e-07	1.51e-05	-	chrX:142710595-142723596	2.658	5e-05	0.00352391
CD180	4064	Hyper-up	chr5	NM_005582	diffreps_peak_26810	66478781	66479280	3.83958	7.61989e-09	1.83e-06	-	chr5:66478102-66492627	2.51593	5e-05	0.00352391
CHST13	166012	Hyper-up	chr3	NM_152889	diffreps_peak_23120	126261041	126261420	3.82396	2.5185e-06	0.000102468	+	chr3:126243125-126277808	2.84804	0.00885	0.173031
DUSP2	1844	Hypo-down	chr2	NM_004418	diffreps_peak_17911	96810941	96811179	3.81075	3.60379e-07	2.29e-05	-	chr2:96808904-96811179	-3.02914	5e-05	0.00352391
LCN10	414332	Hyper-up	chr9	NM_001001712	diffreps_peak_35901	139633241	139633600	3.80961	1.72423e-07	1.38e-05	-	chr9:139632618-139644363	3.31257	0.00015	0.00900556
TLR10	81793	Hyper-up	chr4	NM_030956	diffreps_peak_24443	38776781	38777273	3.80563	4.01797e-07	2.48e-05	-	chr4:38773859-38784611	2.70382	5e-05	0.00352391
EGR2	1959	Hyper-up	chr10	NM_000399	diffreps_peak_4270	64572841	64574228	3.80271	1.88163e-06	8.08e-05	-	chr10:64571755-64679660	3.03743	5e-05	0.00352391
SLC1A3	6507	Hyper-up	chr5	ENST00000513646	diffreps_peak_26454	36608281	36608706	3.78747	1.99764e-07	1.52e-05	+	chr5:36606456-36725297	3.77328	5e-05	0.00352391
FAM198B	51313	Hyper-up	chr4	ENST00000587787	diffreps_peak_25910	159094061	159094280	3.77949	2.47774e-07	1.76e-05	-	chr4:159045625-159176563	2.53079	5e-05	0.00352391
ZNF366	167465	Hyper-up	chr5	NM_152625	diffreps_peak_26883	71739541	71740118	3.77835	1.2366e-09	5.12e-07	-	chr5:71738478-71803554	2.07133	0.04675	0.458778
EGR2	1959	Hyper-up	chr10	NM_000399	diffreps_peak_4271	64575620	64575720	3.76976	3.11131e-09	9.89e-07	-	chr10:64571755-64679660	3.03743	5e-05	0.00352391
FZD5	7855	Hyper-up	chr2	NM_003468	diffreps_peak_19252	208631541	208631920	3.73824	3.28646e-07	2.14e-05	-	chr2:208627309-208634287	2.55356	0.00025	0.0135083
NETO1	81832	Hyper-up	chr18	NM_138966	diffreps_peak_15074	70526161	70526309	3.73563	8.92178e-05	0.00196634	-	chr18:70409548-70535381	4.22031	0.00015	0.00900556
C9orf64	84267	Hyper-up	chr9	NM_032307	diffreps_peak_35085	86571521	86571663	3.73488	0.000440383	0.00726667	-	chr9:86553225-86571901	1.94481	0.0007	0.0292998
WNT5B	81029	Hyper-up	chr12	NM_030775	diffreps_peak_6917	1755181	1755680	3.73126	1.86916e-07	1.46e-05	+	chr12:1639056-1756409	3.55798	0.0161	0.249417
TLR5	7100	Hyper-up	chr1	NM_003268	diffreps_peak_3254	223285021	223285360	3.72124	5.8623e-07	3.28e-05	-	chr1:223282747-223316624	2.60644	5e-05	0.00352391
CD200	4345	Hyper-up	chr3	NM_005944	diffreps_peak_22877	112063808	112064080	3.7164	2.77661e-08	4.24e-06	+	chr3:112021324-112081659	2.11695	0.01275	0.215698
GRAPL	400581	Hypo-up	chr17	ENST00000437957	diffreps_peak_13517	19035365	19035460	3.712	0.000906908	0.0129173	+	chr17:19030781-19062489	2.96454	0.0097	0.184197
HLX	3142	Hyper-up	chr1	NM_021958	diffreps_peak_3195	221057536	221058400	3.69866	8.97351e-06	0.000291065	+	chr1:221006104-221058401	2.61868	5e-05	0.00352391
MYC	4609	Hyper-up	chr8	ENST00000259523	diffreps_peak_33790	128747679	128747880	3.69672	0.0146996	0.112321	+	chr8:128747679-128753674	2.18312	5e-05	0.00352391
PLK2	10769	Hypo-down	chr5	NM_006622	diffreps_peak_26634	57755581	57755966	3.68886	1.46271e-07	1.24e-05	-	chr5:57749808-57756087	-3.14286	0.0007	0.0292998
WASF1	8936	Hyper-up	chr6	NM_003931	diffreps_peak_29674	110422941	110423419	3.68823	1.22578e-07	1.1e-05	-	chr6:110421021-110501207	2.82737	5e-05	0.00352391
GPR153	387509	Hypo-down	chr1	NM_207370	diffreps_peak_107	6320884	6321035	3.66904	0.000327384	0.00572132	-	chr1:6307405-6321035	-1.7058	0.03065	0.362174
FAM50B	26240	Hyper-up	chr6	NM_012135	diffreps_peak_28317	3851221	3851551	3.65474	1.2406e-08	2.49e-06	+	chr6:3832166-3855971	1.82894	0.0408	0.421742
TNFAIP3	7128	Hypo-down	chr6	NM_006290	diffreps_peak_30035	138199681	138200420	3.64006	2.70606e-05	0.000731024	+	chr6:138144809-138204449	-3.5552	5e-05	0.00352391
PIK3R6	146850	Hyper-up	chr17	NM_001010855	diffreps_peak_13395	8726721	8726814	3.6381	1.73922e-05	0.000505401	-	chr17:8706040-8770994	1.6046	0.0166	0.253637
ZNF331	55422	Hypo-down	chr19	NM_018555	diffreps_peak_16415	54080261	54081200	3.63677	7.45985e-06	0.000249362	+	chr19:54024234-54083523	-3.36741	5e-05	0.00352391
ARL11	115761	Hyper-up	chr13	NM_138450	diffreps_peak_9216	50202461	50202751	3.61405	9.32998e-13	1.35e-08	+	chr13:50202434-50208008	1.99842	5e-05	0.00352391
CHST13	166012	Hyper-up	chr3	NM_152889	diffreps_peak_23117	126243130	126243272	3.6113	0.014859	0.113153	+	chr3:126243125-126277808	2.84804	0.00885	0.173031
DSC2	1824	Hyper-up	chr18	NM_004949	diffreps_peak_14660	28659812	28659940	3.6096	0.00235101	0.0274091	-	chr18:28645939-28742819	2.90235	5e-05	0.00352391
CEACAM6	4680	Hypo-down	chr19	ENST00000199764	diffreps_peak_16083	42259328	42259600	3.55677	0.00075515	0.011158	+	chr19:42212503-42290801	-1.64828	0.035	0.390366
PPFIA4	8497	Hyper-up	chr1	NM_001304331	diffreps_peak_2959	203014581	203014687	3.55102	0.0388924	0.231724	+	chr1:202995625-203047868	2.85308	0.03245	0.371861
MYRF	745	Hypo-down	chr11	NM_001127392	diffreps_peak_5900	61538971	61539080	3.5188	0.00582673	0.0553825	+	chr11:61447904-61634826	-4.25766	0.02095	0.288018
HBA2	3040	Hyper-up	chr16	NM_000517	diffreps_peak_12127	223701	223709	3.51332	2.80769e-06	0.000111965	+	chr16:222845-223709	3.42238	5e-05	0.00352391
GCNT2	2651	Hyper-up	chr6	NM_001491	diffreps_peak_28473	10556881	10557160	3.50804	2.10052e-08	3.52e-06	+	chr6:10492455-10629601	1.97838	0.00035	0.0176295
KIR3DX1	90011	Hypo-down	chr19	ENST00000335056	diffreps_peak_16463	55056121	55056540	3.48771	2.25488e-07	1.66e-05	+	chr19:55043908-55057053	-3.34051	0.00475	0.117635
ENC1	8507	Hypo-down	chr5	NM_003633	diffreps_peak_26910	73931381	73931900	3.48631	2.65246e-06	0.000106967	-	chr5:73923230-74072737	-3.13584	0.00305	0.0863247
HLX	3142	Hyper-up	chr1	NM_021958	diffreps_peak_3194	221055581	221055690	3.48018	1.38328e-06	6.32e-05	+	chr1:221006104-221058401	2.61868	5e-05	0.00352391
C1orf21	81563	Hypo-down	chr1	NM_030806	diffreps_peak_2743	184597501	184597860	3.47838	5.67029e-08	6.64e-06	+	chr1:184356191-184598154	-2.18359	0.0097	0.184197
CEACAM3	1084	Hyper-up	chr19	NM_001815	diffreps_peak_16084	42300521	42300673	3.47554	7.62757e-06	0.000254083	+	chr19:42300368-42315591	3.22274	0.0049	0.121014
ZNF658	26149	Hyper-up	chr9	NM_033160	diffreps_peak_34527	40784106	40784202	3.46083	0.00123737	0.0165502	-	chr9:40760699-40836415	1.68642	0.0209	0.287552
BRIP1	83990	Hyper-up	chr17	NM_032043	diffreps_peak_14065	59763261	59763520	3.4539	0.000481158	0.0077994	-	chr17:59758626-59940882	1.75094	0.0497	0.471329
ANKEF1	63926	Hyper-up	chr20	NM_022096	diffreps_peak_19855	10032441	10032537	3.45105	5.9262e-06	0.000206598	+	chr20:9966735-10349424	1.59911	0.03315	0.377216
HBA1	3039	Hyper-up	chr16	NM_000558	diffreps_peak_12129	227481	227521	3.44709	3.31676e-05	0.000864936	+	chr16:226678-227521	3.10687	5e-05	0.00352391
KIF19	124602	Hypo-down	chr17	NM_153209	diffreps_peak_14210	72340361	72340487	3.44262	5.65719e-05	0.00134703	+	chr17:72322348-72351959	-3.8019	5e-05	0.00352391
PDE4D	5144	Hypo-down	chr5	NM_006203	diffreps_peak_26647	58269961	58270180	3.43782	6.0094e-07	3.34e-05	-	chr5:58264864-59843484	-2.24047	5e-05	0.00352391
MEOX1	4222	Hyper-up	chr17	NM_004527	diffreps_peak_13839	41720855	41720920	3.43668	0.000725097	0.0108058	-	chr17:41717755-41739322	2.16224	0.0245	0.317902
HLX	3142	Hyper-up	chr1	NM_021958	diffreps_peak_3192	221053281	221053791	3.43202	1.07515e-05	0.000338643	+	chr1:221006104-221058401	2.61868	5e-05	0.00352391
CXCR4	7852	Hypo-down	chr2	NM_003467	diffreps_peak_18418	136872361	136872820	3.42316	4.32352e-05	0.0010761	-	chr2:136871918-136875735	-3.2809	5e-05	0.00352391
LAMA5	3911	Hyper-up	chr20	uc021wfw.1	diffreps_peak_20399	60891937	60892079	3.41892	0.000497259	0.00800585	-	chr20:60877148-60942368	3.9982	0.00125	0.0450278
GSTM4	2948	Hyper-up	chr1	ENST00000369833	diffreps_peak_1592	110200001	110200240	3.41463	0.00326473	0.035415	+	chr1:110198702-110208118	1.80646	0.0318	0.36796
TNFSF9	8744	Hypo-down	chr19	NM_003811	diffreps_peak_15332	6534761	6535340	3.38985	3.16227e-08	4.61e-06	+	chr19:6531009-6535931	-2.49651	0.01885	0.269538
SLC7A5	8140	Hypo-down	chr16	NM_003486	diffreps_peak_13090	87902821	87903100	3.38664	8.90895e-07	4.48e-05	-	chr16:87863628-87903094	-2.74636	5e-05	0.00352391
CD163	9332	Hyper-up	chr12	NM_004244	diffreps_peak_7052	7656361	7656414	3.3865	0.00219464	0.0259734	-	chr12:7499280-7656489	2.19396	5e-05	0.00352391
ENC1	8507	Hypo-down	chr5	NM_003633	diffreps_peak_26909	73930941	73931320	3.37794	1.29939e-06	6e-05	-	chr5:73923230-74072737	-3.13584	0.00305	0.0863247
CISH	1154	Hyper-up	chr3	NM_013324	diffreps_peak_22377	50643884	50644380	3.36657	3.25066e-09	1.02e-06	-	chr3:50643920-50686720	2.94983	0.00335	0.0917571
SH2D2A	9047	Hypo-down	chr1	NM_003975	diffreps_peak_2209	156779101	156779282	3.36343	1.23481e-06	5.76e-05	-	chr1:156776034-156851642	-3.13657	5e-05	0.00352391
C14orf64		Hyper-up	chr14	ENST00000556462	diffreps_peak_10729	98399398	98399540	3.35993	2.65457e-06	0.00010702	-	chr14:98391946-98444461	1.53508	0.02485	0.320391
KIAA0226L	80183	Hyper-up	chr13	NM_001286761	diffreps_peak_9171	46964081	46964177	3.35612	1.77452e-07	1.41e-05	-	chr13:46916138-47012325	1.50271	0.0174	0.259198
CD180	4064	Hyper-up	chr5	NM_005582	diffreps_peak_26811	66479801	66480100	3.34882	6.29496e-08	7.1e-06	-	chr5:66478102-66492627	2.51593	5e-05	0.00352391
SLC15A2	6565	Hyper-up	chr3	NM_021082	diffreps_peak_23015	121659701	121660120	3.34146	1.87925e-07	1.46e-05	+	chr3:121612935-121662949	2.55046	0.02215	0.29921
CCR2	729230	Hyper-up	chr3	ENST00000400888	diffreps_peak_22271	46402281	46402419	3.33653	4.69674e-07	2.78e-05	+	chr3:46395224-46402419	3.14563	5e-05	0.00352391
FAM198B	51313	Hyper-up	chr4	ENST00000587787	diffreps_peak_25911	159094341	159094470	3.32337	7.48557e-05	0.00169922	-	chr4:159045625-159176563	2.53079	5e-05	0.00352391
ENC1	8507	Hypo-down	chr5	NM_003633	diffreps_peak_26908	73930581	73930900	3.31771	4.66121e-07	2.76e-05	-	chr5:73923230-74072737	-3.13584	0.00305	0.0863247
DACT1	51339	Hyper-up	chr14	NM_016651	diffreps_peak_10149	59107453	59107560	3.31119	0.0111137	0.0910612	+	chr14:59100684-59115039	2.60799	0.0002	0.0113213
LGALS9C	654346	Hypo-down	chr17	NM_001040078	diffreps_peak_13503	18392254	18392350	3.31008	0.0106052	0.0878035	+	chr17:18380050-18398259	-3.5176	0.0053	0.126343
TNFSF10	8743	Hyper-up	chr3	NM_003810	diffreps_peak_23674	172223801	172224709	3.30698	4.55615e-09	1.29e-06	-	chr3:172223297-172241297	2.47881	5e-05	0.00352391
CDK18	5129	Hypo-up	chr1	NM_002596	diffreps_peak_2989	205500471	205500560	3.30645	0.00063353	0.00970709	+	chr1:205473722-205501921	1.81988	0.01755	0.259696
SPINT1	6692	Hyper-up	chr15	NM_003710	diffreps_peak_11259	41137201	41137227	3.30191	6.49834e-08	7.24e-06	+	chr15:41128005-41150405	1.57817	0.0396	0.414382
HGF	3082	Hyper-up	chr7	ENST00000453018	diffreps_peak_31499	81392022	81392312	3.29366	5.43879e-07	3.1e-05	-	chr7:81328321-81399754	2.41925	0.0004	0.0197028
CXCR4	7852	Hypo-down	chr2	NM_003467	diffreps_peak_18420	136875615	136875725	3.29228	1.09052e-06	5.24e-05	-	chr2:136871918-136875735	-3.2809	5e-05	0.00352391
CREB5	9586	Hyper-up	chr7	NM_001011666	diffreps_peak_30890	28725597	28725814	3.28658	7.8762e-07	4.08e-05	+	chr7:28338939-28865511	2.15247	0.00015	0.00900556
ZNF331	55422	Hypo-down	chr19	NM_018555	diffreps_peak_16416	54081301	54081840	3.27891	1.25786e-06	5.85e-05	+	chr19:54024234-54083523	-3.36741	5e-05	0.00352391
GATM	2628	Hyper-up	chr15	NM_001482	diffreps_peak_11372	45668798	45668820	3.27857	0.00567557	0.054283	-	chr15:45653321-45694525	2.15267	0.0281	0.344365
SH3PXD2B	285590	Hyper-up	chr5	NM_001017995	diffreps_peak_28096	171881281	171881420	3.27848	1.62963e-05	0.000478925	-	chr5:171752184-171881527	2.71379	0.00405	0.10466
BTLA	151888	Hyper-up	chr3	NM_181780	diffreps_peak_22892	112185061	112185230	3.27035	9.40965e-08	9.16e-06	-	chr3:112182814-112218408	1.81718	0.00785	0.159242
IDH1	3417	Hyper-up	chr2	NM_005896	diffreps_peak_19259	209119781	209119867	3.27027	0.00702838	0.0639155	-	chr2:209100950-209130798	1.74259	5e-05	0.00352391
TRIM7	81786	Hyper-up	chr5	NM_203293	diffreps_peak_28216	180621941	180622140	3.26875	4.88003e-05	0.00119065	-	chr5:180618923-180632293	2.48618	0.0185	0.267609
ZNF804A	91752	Hyper-up	chr2	NM_194250	diffreps_peak_18941	185801241	185801580	3.26701	4.59679e-06	0.000167379	+	chr2:185463092-185804219	2.02459	0.00515	0.124094
DYSF	8291	Hyper-up	chr2	NM_003494	diffreps_peak_17627	71680752	71680820	3.25625	3.74945e-07	2.36e-05	+	chr2:71680752-71913898	2.47871	5e-05	0.00352391
TLR7	51284	Hyper-up	chrX	NM_016562	diffreps_peak_36121	12907901	12908220	3.25399	2.12251e-07	1.59e-05	+	chrX:12885201-12908499	1.66195	0.00055	0.0251463
LMNA	4000	Hypo-down	chr1	NM_005572	diffreps_peak_2189	156085061	156085065	3.25234	7.90619e-07	4.09e-05	+	chr1:156052363-156109880	-1.6724	0.0014	0.049044
C1orf220	400798	Hyper-up	chr1	ENST00000319387	diffreps_peak_2614	178514347	178515038	3.24983	1.84148e-06	7.95e-05	+	chr1:178482211-178518024	2.80576	0.0018	0.0591083
MEOX1	4222	Hyper-up	chr17	NM_004527	diffreps_peak_13838	41718561	41719400	3.24561	3.39563e-08	4.82e-06	-	chr17:41717755-41739322	2.16224	0.0245	0.317902
CXCR2	3579	Hyper-up	chr2	NM_001557	diffreps_peak_19352	218990735	218990880	3.24462	5.90006e-07	3.29e-05	+	chr2:218990011-219001976	2.54397	5e-05	0.00352391
SEC14L2	23541	Hypo-down	chr22	NM_012429	diffreps_peak_21266	30792929	30793159	3.24003	3.02854e-07	2.02e-05	+	chr22:30727976-30825045	-5.48872	5e-05	0.00352391
NETO1	81832	Hyper-up	chr18	NM_138966	diffreps_peak_15070	70417361	70417680	3.2396	4.08273e-07	2.51e-05	-	chr18:70409548-70535381	4.22031	0.00015	0.00900556
DSC2	1824	Hyper-up	chr18	NM_004949	diffreps_peak_14659	28648264	28648310	3.23162	0.000979479	0.0137587	-	chr18:28645939-28742819	2.90235	5e-05	0.00352391
CXCR4	7852	Hypo-down	chr2	NM_003467	diffreps_peak_18419	136873041	136873300	3.23158	1.66379e-05	0.000487451	-	chr2:136871918-136875735	-3.2809	5e-05	0.00352391
ZNF366	167465	Hyper-up	chr5	NM_152625	diffreps_peak_26885	71756021	71757337	3.23155	1.02688e-08	2.21e-06	-	chr5:71738478-71803554	2.07133	0.04675	0.458778
SIK1	150094	Hypo-down	chr21	NM_173354	diffreps_peak_20831	44836401	44836997	3.22707	5.60163e-06	0.000197261	-	chr21:44834394-44847008	-2.74212	0.0007	0.0292998
ERMAP	114625	Hypo-up	chr1	NM_018538	diffreps_peak_655	43310621	43310660	3.21951	0.0352848	0.216434	+	chr1:43272722-43312093	1.74498	0.03425	0.385064
CIT	11113	Hypo-down	chr12	NM_007174	diffreps_peak_8579	120166306	120166411	3.21839	0.0393753	0.233787	-	chr12:120123594-120315095	-2.06319	0.0099	0.186603
BTLA	151888	Hyper-up	chr3	NM_181780	diffreps_peak_22897	112218117	112218200	3.21385	1.09985e-07	1.02e-05	-	chr3:112182814-112218408	1.81718	0.00785	0.159242
DYSF	8291	Hyper-up	chr2	NM_003494	diffreps_peak_17648	71913801	71913893	3.21296	5.20554e-07	3.01e-05	+	chr2:71680752-71913898	2.47871	5e-05	0.00352391
ARHGEF10	9639	Hyper-up	chr8	NM_001308152	diffreps_peak_32549	1812535	1812602	3.20652	3.15024e-07	2.08e-05	+	chr8:1772141-1906807	2.54058	0.00035	0.0176295
ZSWIM3	140831	Hyper-up	chr20	NM_080752	diffreps_peak_20268	44506341	44507200	3.2	2.8569e-08	4.32e-06	+	chr20:44486255-44507761	2.17225	0.01705	0.256989
GIMAP8	155038	Hyper-up	chr7	NM_175571	diffreps_peak_32392	150174179	150174800	3.19217	9.44824e-10	4.17e-07	+	chr7:150147717-150176480	2.42403	5e-05	0.00352391
OSM	5008	Hypo-down	chr22	NM_020530	diffreps_peak_21251	30660990	30661133	3.19029	2.30907e-07	1.68e-05	-	chr22:30658817-30662829	-4.24349	5e-05	0.00352391
AL627309.1		Hyper-up	chr1	ENST00000423372	diffreps_peak_4	135121	135520	3.18789	8.41767e-07	4.29e-05	-	chr1:89294-140566	2.40893	5e-05	0.00352391
DFNB31	25861	Hypo-down	chr9	NM_015404	diffreps_peak_35499	117266541	117266740	3.18101	2.73466e-07	1.88e-05	-	chr9:117164359-117267730	-2.67606	0.00895	0.173653
ZNF366	167465	Hyper-up	chr5	NM_152625	diffreps_peak_26890	71803077	71803249	3.17981	9.5741e-06	0.000307048	-	chr5:71738478-71803554	2.07133	0.04675	0.458778
GCNT1	2650	Hyper-up	chr9	NM_001490	diffreps_peak_34932	79074067	79074221	3.17635	6.64232e-05	0.00153836	+	chr9:79034751-79122332	1.90611	0.0007	0.0292998
TLR5	7100	Hyper-up	chr1	NM_003268	diffreps_peak_3253	223283581	223284320	3.17377	1.34174e-06	6.16e-05	-	chr1:223282747-223316624	2.60644	5e-05	0.00352391
SH2D1B	117157	Hypo-down	chr1	NM_053282	diffreps_peak_2384	162381741	162381928	3.17354	6.15499e-07	3.4e-05	-	chr1:162365055-162381928	-2.62055	5e-05	0.00352391
KIR3DX1	90011	Hypo-down	chr19	uc010erm.2	diffreps_peak_16462	55048121	55048381	3.15577	0.000644723	0.0098445	+	chr19:55043908-55057053	-3.34051	0.00475	0.117635
SLITRK4	139065	Hyper-up	chrX	NM_173078	diffreps_peak_37464	142717521	142718160	3.15338	1.07015e-06	5.17e-05	-	chrX:142710595-142723596	2.658	5e-05	0.00352391
SLC1A3	6507	Hyper-up	chr5	NM_004172	diffreps_peak_26456	36686181	36686540	3.13574	2.86052e-07	1.95e-05	+	chr5:36606456-36725297	3.77328	5e-05	0.00352391
CYFIP1	23191	Hyper-up	chr15	NM_014608	diffreps_peak_11037	22892648	22892781	3.13358	3.08248e-08	4.54e-06	+	chr15:22892004-23034427	1.78861	0.0002	0.0113213
ZNF681	148213	Hyper-up	chr19	NM_138286	diffreps_peak_15711	23937624	23937720	3.13262	0.000836235	0.0121106	-	chr19:23921996-23941693	2.07962	0.00695	0.14718
TCEANC2	127428	Hyper-up	chr1	ENST00000371331	diffreps_peak_862	54519806	54520040	3.12987	0.00016448	0.00326522	+	chr1:54519259-54578192	1.64174	0.012	0.20774
CECR6	27439	Hyper-up	chr22	NM_031890	diffreps_peak_21008	17600281	17600480	3.12372	0.000265001	0.00480957	-	chr22:17597188-17602257	2.57219	5e-05	0.00352391
PHLDA1	22822	Hypo-down	chr12	NM_007350	diffreps_peak_8084	76424289	76425460	3.11872	4.67931e-06	0.000169837	-	chr12:76419226-76427712	-2.59298	5e-05	0.00352391
MYO7B	4648	Hyper-up	chr2	NM_001080527	diffreps_peak_18327	128389841	128389976	3.11656	0.00142336	0.0185004	+	chr2:128293377-128395304	2.31056	0.01855	0.267609
MKI67	4288	Hypo-down	chr10	NM_002417	diffreps_peak_5047	129914141	129914271	3.10706	0.000194989	0.00374519	-	chr10:129894922-129924649	-1.76552	0.01645	0.252644
ZSWIM3	140831	Hyper-up	chr20	NM_080752	diffreps_peak_20267	44505352	44505680	3.10561	7.34157e-11	7.88e-08	+	chr20:44486255-44507761	2.17225	0.01705	0.256989
CCDC154	645811	Hyper-up	chr16	NM_001143980	diffreps_peak_12171	1492406	1492530	3.10537	1.92122e-05	0.000549537	-	chr16:1484383-1494557	2.83589	0.03175	0.36796
GBGT1	26301	Hyper-up	chr9	NM_021996	diffreps_peak_35821	136028521	136029180	3.10113	3.52925e-07	2.26e-05	-	chr9:135973106-136039332	2.40157	0.0271	0.336739
ATF3	467	Hypo-down	chr1	NM_001040619	diffreps_peak_3120	212792681	212793080	3.10059	2.39211e-06	9.82e-05	+	chr1:212738675-212794119	-2.53921	5e-05	0.00352391
FCRLA	84824	Hyper-up	chr1	NM_032738	diffreps_peak_2372	161684041	161684142	3.09888	0.00039087	0.00660473	+	chr1:161676761-161684142	1.68558	0.0041	0.104888
SMAD7	4092	Hypo-down	chr18	NM_005904	diffreps_peak_14872	46476741	46477081	3.09626	1.10813e-06	5.31e-05	-	chr18:46446222-46477081	-2.86664	5e-05	0.00352391
YES1	7525	Hypo-down	chr18	NM_005433	diffreps_peak_14429	724381	724600	3.09183	2.50884e-07	1.78e-05	-	chr18:721587-812547	-2.95171	0.0002	0.0113213
ZNF804A	91752	Hyper-up	chr2	NM_194250	diffreps_peak_18942	185801661	185802020	3.09171	1.81661e-08	3.2e-06	+	chr2:185463092-185804219	2.02459	0.00515	0.124094
GAS6	2621	Hyper-up	chr13	NM_000820	diffreps_peak_9649	114523681	114523960	3.09118	3.53401e-07	2.26e-05	-	chr13:114518582-114567046	2.23383	0.0101	0.188975
SC5D	6309	Hypo-down	chr11	NM_006918	diffreps_peak_6688	121163387	121163480	3.08904	0.016807	0.124196	+	chr11:121163161-121179403	-2.45922	5e-05	0.00352391
ERRFI1	54206	Hypo-down	chr1	NM_018948	diffreps_peak_148	8073261	8073860	3.08451	2.10187e-07	1.58e-05	-	chr1:8064463-8086368	-3.33864	0.0005	0.0234003
SSTR3	6753	Hyper-up	chr22	NM_001051	diffreps_peak_21390	37603521	37603878	3.07784	1.90598e-05	0.000545985	-	chr22:37600277-37608362	1.82113	0.01555	0.243649
CCIN	881	Hyper-up	chr9	NM_005893	diffreps_peak_34449	36169841	36170040	3.07295	0.000453638	0.00744434	+	chr9:36169388-36171329	3.13216	0.005	0.12213
ZNF2	7549	Hyper-up	chr2	NM_001291605	diffreps_peak_17893	95846808	95847120	3.07116	2.15676e-08	3.58e-06	+	chr2:95831176-95850065	2.05164	0.0216	0.294688
TLR8	51311	Hyper-up	chrX	NM_016610	diffreps_peak_36122	12924738	12924828	3.05352	0.000334855	0.00582537	+	chrX:12920935-12961419	1.80269	5e-05	0.00352391
C2orf81	388963	Hyper-up	chr2	ENST00000517883	diffreps_peak_17693	74642661	74643160	3.05124	6.52729e-08	7.27e-06	-	chr2:74641303-74648718	2.34743	0.034	0.384182
S1PR5	53637	Hypo-down	chr19	ENST00000590601	diffreps_peak_15448	10627961	10628103	3.04834	1.05751e-07	9.92e-06	-	chr19:10623622-10628607	-2.53694	5e-05	0.00352391
GCNT2	2651	Hyper-up	chr6	NM_001491	diffreps_peak_28481	10626861	10627160	3.04606	3.74497e-08	5.12e-06	+	chr6:10492455-10629601	1.97838	0.00035	0.0176295
GIMAP8	155038	Hyper-up	chr7	NM_175571	diffreps_peak_32391	150171099	150171726	3.04289	3.15277e-09	1e-06	+	chr7:150147717-150176480	2.42403	5e-05	0.00352391
FSTL3	10272	Hyper-up	chr19	NM_005860	diffreps_peak_15162	680361	680489	3.04167	0.0195296	0.139004	+	chr19:676391-683385	2.44066	0.00155	0.0528452
ZNF397	84307	Hyper-up	chr18	ENST00000585800	diffreps_peak_14707	32821020	32821160	3.04	4.26553e-07	2.59e-05	+	chr18:32820993-32870196	1.66093	0.01135	0.200378
N4BP3	23138	Hypo-down	chr5	NM_015111	diffreps_peak_28173	177552541	177552800	3.03802	0.000412885	0.0068957	+	chr5:177540443-177553088	-1.69069	0.01515	0.240552
HRH2	3274	Hyper-up	chr5	NM_001131055	diffreps_peak_28112	175085039	175085158	3.02193	1.60281e-06	7.11e-05	+	chr5:175085032-175113245	2.55969	5e-05	0.00352391
SAMD4A	23034	Hyper-up	chr14	NM_015589	diffreps_peak_10089	55203741	55203860	3.01826	0.00252856	0.0290172	+	chr14:55033814-55260033	2.15986	0.0008	0.03242
CREB5	9586	Hyper-up	chr7	NM_004904	diffreps_peak_30891	28758369	28758496	3.01282	7.66772e-07	4e-05	+	chr7:28338939-28865511	2.15247	0.00015	0.00900556
ZBTB49	166793	Hypo-down	chr4	NM_145291	diffreps_peak_24076	4291923	4292079	3.00482	0.000678377	0.0102505	+	chr4:4291923-4323513	-1.97232	0.0052	0.124961
IL1RAP	3556	Hyper-up	chr3	NM_002182	diffreps_peak_23876	190231839	190231940	3	0.00344571	0.0368729	+	chr3:190231839-190375843	1.64698	0.03625	0.398259
MARCO	8685	Hyper-up	chr2	NM_006770	diffreps_peak_18231	119732096	119732141	2.99935	0.00128287	0.017049	+	chr2:119699741-119752236	2.06154	0.00105	0.0394991
MYO10	4651	Hyper-up	chr5	NM_012334	diffreps_peak_26354	16701121	16701840	2.99727	1.40954e-07	1.21e-05	-	chr5:16665394-16936372	2.84067	0.00405	0.10466
AMOT	154796	Hypo-up	chrX	NM_133265	diffreps_peak_37241	112048174	112048300	2.99167	0.0001199	0.00251688	-	chrX:112017730-112084043	2.02518	0.04785	0.46522
LGALS9B	284194	Hypo-down	chr17	ENST00000423676	diffreps_peak_13555	20352761	20353040	2.99077	5.70061e-08	6.66e-06	-	chr17:20352707-20370852	-2.89654	0.00315	0.0878993
DNASE1	1773	Hyper-up	chr16	NM_005223	diffreps_peak_12243	3703661	3704220	2.98894	4.78937e-10	2.66e-07	+	chr16:3661728-3767598	2.1302	0.0071	0.148941
DACT1	51339	Hyper-up	chr14	NM_016651	diffreps_peak_10150	59112821	59113040	2.98828	5.52615e-05	0.00132098	+	chr14:59100684-59115039	2.60799	0.0002	0.0113213
SAPCD2	89958	Hyper-up	chr9	NM_178448	diffreps_peak_35921	139964821	139965028	2.98566	0.0252559	0.168476	-	chr9:139952114-139965040	1.95374	0.0076	0.155944
CXCR2	3579	Hyper-up	chr2	NM_001557	diffreps_peak_19353	219000961	219001720	2.98439	2.90107e-06	0.000115043	+	chr2:218990011-219001976	2.54397	5e-05	0.00352391
GRASP	160622	Hypo-down	chr12	NM_181711	diffreps_peak_7783	52400728	52400840	2.98237	1.13881e-07	1.05e-05	+	chr12:52400723-52409673	-2.7205	0.0003	0.0156412
PER1	5187	Hypo-down	chr17	ENST00000354903	diffreps_peak_13375	8047881	8048140	2.98087	1.83136e-05	0.000528216	-	chr17:8043787-8066864	-2.03421	0.0057	0.13111
PTGS2	5743	Hypo-down	chr1	NM_000963	diffreps_peak_2780	186649381	186649559	2.98083	8.53791e-07	4.33e-05	-	chr1:186640922-186649559	-3.29017	5e-05	0.00352391
PIM1	5292	Hyper-up	chr6	NM_001243186	diffreps_peak_28929	37141801	37142260	2.97706	1.82525e-05	0.000526716	+	chr6:37137978-37143202	2.37945	5e-05	0.00352391
DUSP10	11221	Hypo-down	chr1	NM_007207	diffreps_peak_3207	221875881	221876019	2.97698	6.62056e-07	3.59e-05	-	chr1:221874765-221915518	-2.69624	5e-05	0.00352391
PDE4D	5144	Hyper-down	chr5	NM_001197220	diffreps_peak_26662	58571601	58571800	2.97541	0.0238545	0.161481	-	chr5:58264864-59843484	-2.24047	5e-05	0.00352391
AL627309.1		Hyper-up	chr1	ENST00000423372	diffreps_peak_5	138041	138580	2.9607	1.10405e-06	5.3e-05	-	chr1:89294-140566	2.40893	5e-05	0.00352391
HVCN1	84329	Hyper-up	chr12	ENST00000548312	diffreps_peak_8514	111127116	111127222	2.95903	4.32401e-09	1.24e-06	-	chr12:111051831-111142755	2.05634	5e-05	0.00352391
COL19A1	1310	Hyper-up	chr6	NM_001858	diffreps_peak_29263	70778314	70778368	2.949	0.000585593	0.00911885	+	chr6:70576462-70919679	1.54812	0.04355	0.437734
HAL	3034	Hyper-up	chr12	ENST00000548808	diffreps_peak_8352	96369921	96370120	2.9481	8.41745e-08	8.53e-06	-	chr12:96366439-96390143	1.81471	0.01735	0.258885
MSRB2	22921	Hyper-up	chr10	NM_012228	diffreps_peak_3891	23409961	23410860	2.94429	1.29745e-07	1.14e-05	+	chr10:23384434-23410942	2.25021	0.00035	0.0176295
C19orf82		Hyper-up	chr19	ENST00000591056	diffreps_peak_15412	9743021	9743320	2.93646	3.77578e-05	0.00096352	+	chr19:9715355-9756572	2.45707	0.04135	0.425454
LAIR2	3904	Hypo-down	chr19	NM_002288	diffreps_peak_16460	55014915	55014951	2.92515	0.000656435	0.00998847	+	chr19:55009099-55021897	-2.46135	0.02325	0.307545
S1PR5	53637	Hypo-down	chr19	NM_030760	diffreps_peak_15447	10625281	10625705	2.92151	4.3967e-07	2.65e-05	-	chr19:10623622-10628607	-2.53694	5e-05	0.00352391
CLEC17A	388512	Hyper-up	chr19	NM_207390	diffreps_peak_15570	14721101	14721300	2.91864	5.19297e-07	3e-05	+	chr19:14693895-14721969	1.98287	0.0024	0.072656
NR4A1	3164	Hypo-down	chr12	NM_002135	diffreps_peak_7788	52445185	52445340	2.91707	2.28997e-06	9.48e-05	+	chr12:52416615-52453291	-2.25073	0.0003	0.0156412
ZKSCAN3	80317	Hyper-up	chr6	NM_024493	diffreps_peak_28718	28327621	28327765	2.91209	0.00132428	0.0174665	+	chr6:28292469-28336947	1.61446	0.027	0.336352
ZNF514	84874	Hyper-up	chr2	ENST00000411425	diffreps_peak_17892	95824604	95825060	2.91111	4.29354e-11	5.99e-08	-	chr2:95752951-95831158	2.03475	0.00175	0.0581085
TNFRSF10D	8793	Hyper-up	chr8	NM_003840	diffreps_peak_32768	22995281	22995516	2.90832	7.12088e-07	3.79e-05	-	chr8:22993100-23021543	1.90391	0.0001	0.0065797
STARD4	134429	Hypo-down	chr5	NM_139164	diffreps_peak_27400	110848161	110848295	2.90717	1.70559e-07	1.37e-05	-	chr5:110831730-111353006	-1.88579	0.00015	0.00900556
PDCD1	5133	Hypo-down	chr2	NM_005018	diffreps_peak_19663	242794349	242794440	2.90185	4.92382e-05	0.00119944	-	chr2:242792032-242801060	-2.59201	0.0026	0.0768832
FAM114A1	92689	Hyper-up	chr4	ENST00000510213	diffreps_peak_24458	38869321	38869455	2.90083	0.00352609	0.0375554	+	chr4:38869297-38947360	3.56208	0.0008	0.03242
DUSP4	1846	Hypo-down	chr8	NM_001394	diffreps_peak_32862	29194161	29194780	2.89957	1.05135e-06	5.1e-05	-	chr8:29190580-29208185	-3.68335	5e-05	0.00352391
FAM118A	55007	Hypo-down	chr22	NM_017911	diffreps_peak_21572	45705784	45705860	2.89879	0.000292142	0.00521345	+	chr22:45704848-45737836	-2.07339	5e-05	0.00352391
HIC1	3090	Hypo-down	chr17	NM_006497	diffreps_peak_13218	1960821	1962340	2.88754	3.34843e-06	0.000129269	+	chr17:1957447-1962981	-3.36785	0.0001	0.0065797
SH3BGR	6450	Hyper-down	chr21	NM_007341	diffreps_peak_20751	40847060	40847141	2.88321	0.00804555	0.0709489	+	chr21:40817780-40887433	-3.20563	0.04785	0.46522
HSPA1A	3303	Hyper-up	chr6	NM_005345	diffreps_peak_28813	31783290	31783420	2.87576	7.77905e-07	4.04e-05	+	chr6:31777395-31785723	2.05825	5e-05	0.00352391
MYO7B	4648	Hyper-up	chr2	NM_001080527	diffreps_peak_18328	128390832	128390938	2.87097	0.000355856	0.00612343	+	chr2:128293377-128395304	2.31056	0.01855	0.267609
TMEM176A	55365	Hyper-up	chr7	ENST00000484928	diffreps_peak_32432	150497490	150497820	2.86919	0.0197702	0.140131	+	chr7:150488372-150502208	2.398	0.01675	0.255055
NLRP12	91662	Hyper-up	chr19	NM_144687	diffreps_peak_16427	54327481	54327657	2.86564	1.07641e-06	5.19e-05	-	chr19:54296854-54327657	1.78706	5e-05	0.00352391
C19orf82		Hyper-up	chr19	ENST00000586614	diffreps_peak_15411	9742903	9742920	2.86339	0.00352426	0.0375388	+	chr19:9715355-9756572	2.45707	0.04135	0.425454
DUSP3	1845	Hyper-up	chr17	NM_004090	diffreps_peak_13840	41856261	41856368	2.85885	0.000720796	0.0107589	-	chr17:41843488-41856356	1.79804	0.00115	0.042367
GCNT1	2650	Hyper-up	chr9	NM_001490	diffreps_peak_34935	79118321	79118820	2.85517	4.24601e-11	5.98e-08	+	chr9:79034751-79122332	1.90611	0.0007	0.0292998
ARHGEF40	55701	Hyper-up	chr14	NM_018071	diffreps_peak_9720	21541203	21541280	2.85517	3.19787e-07	2.1e-05	+	chr14:21484921-21572881	1.66832	0.0041	0.104888
DUSP4	1846	Hypo-down	chr8	NM_057158	diffreps_peak_32863	29206181	29206322	2.84912	1.23039e-05	0.00037995	-	chr8:29190580-29208185	-3.68335	5e-05	0.00352391
ENC1	8507	Hypo-down	chr5	NM_003633	diffreps_peak_26907	73930508	73930520	2.84473	1.56608e-07	1.3e-05	-	chr5:73923230-74072737	-3.13584	0.00305	0.0863247
SMAD7	4092	Hypo-down	chr18	NM_005904	diffreps_peak_14871	46476181	46476660	2.843	2.21276e-06	9.21e-05	-	chr18:46446222-46477081	-2.86664	5e-05	0.00352391
CPVL	54504	Hyper-up	chr7	ENST00000409850	diffreps_peak_30919	29226062	29226163	2.84151	8.60305e-08	8.65e-06	-	chr7:29019582-29603286	1.71182	5e-05	0.00352391
HRH2	3274	Hyper-up	chr5	NM_022304	diffreps_peak_28116	175109461	175110340	2.83474	8.49297e-06	0.000278238	+	chr5:175085032-175113245	2.55969	5e-05	0.00352391
PER1	5187	Hypo-down	chr17	NM_002616	diffreps_peak_13373	8044141	8044520	2.83283	1.02573e-05	0.000325292	-	chr17:8043787-8066864	-2.03421	0.0057	0.13111
GNLY	10578	Hypo-down	chr2	NM_006433	diffreps_peak_17794	85921413	85921520	2.832	0.000429148	0.00712259	+	chr2:85912297-85925977	-1.97436	5e-05	0.00352391
MYO10	4651	Hyper-up	chr5	NM_012334	diffreps_peak_26355	16703033	16703267	2.82203	3.08136e-06	0.000120826	-	chr5:16665394-16936372	2.84067	0.00405	0.10466
PDE4D	5144	Hypo-down	chr5	NM_006203	diffreps_peak_26648	58270501	58270907	2.82168	2.476e-06	0.000101103	-	chr5:58264864-59843484	-2.24047	5e-05	0.00352391
BMP2K	55589	Hyper-up	chr4	NM_198892	diffreps_peak_24835	79831763	79833240	2.81749	2.62216e-06	0.000106	+	chr4:79697495-79860592	1.86705	0.0056	0.130528
IER3	8870	Hypo-down	chr6	NM_003897	diffreps_peak_28770	30712221	30712327	2.8173	0.000624023	0.00958777	-	chr6:30710705-30712331	-2.87719	5e-05	0.00352391
PCDH9	5101	Hyper-up	chr13	NM_020403	diffreps_peak_9327	67800721	67801380	2.8163	9.43893e-07	4.68e-05	-	chr13:66876965-67804468	2.06282	0.00015	0.00900556
IL17RA	23765	Hyper-up	chr22	NM_014339	diffreps_peak_21007	17595661	17596200	2.8115	6.25726e-07	3.44e-05	+	chr22:17565843-17596583	1.83203	5e-05	0.00352391
MRVI1	10335	Hyper-up	chr11	NM_130385	diffreps_peak_5394	10596041	10596420	2.81119	2.60055e-07	1.82e-05	-	chr11:10562782-10715535	1.95921	0.00025	0.0135083
CDC42EP1	11135	Hyper-up	chr22	NM_152243	diffreps_peak_21406	37962078	37962819	2.80691	7.01588e-05	0.00160985	+	chr22:37956453-37965412	2.74259	0.00635	0.138758
PHACTR1	221692	Hypo-down	chr6	ENST00000379329	diffreps_peak_28513	13283901	13284139	2.80305	5.61945e-07	3.18e-05	+	chr6:12717892-13328815	-2.56442	5e-05	0.00352391
AQP9	366	Hyper-up	chr15	NM_020980	diffreps_peak_11550	58476381	58476620	2.80185	0.000168034	0.00332234	+	chr15:58245621-58861151	2.07932	0.0005	0.0234003
F5	2153	Hyper-up	chr1	NM_000130	diffreps_peak_2485	169484681	169484780	2.79555	4.24787e-07	2.59e-05	-	chr1:169483403-169555826	2.02326	5e-05	0.00352391
PCDH9	5101	Hyper-up	chr13	ENST00000377861	diffreps_peak_9326	67799361	67800260	2.79394	1.49197e-06	6.72e-05	-	chr13:66876965-67804468	2.06282	0.00015	0.00900556
LILRB1	10859	Hyper-up	chr19	uc010erp.1	diffreps_peak_16474	55147221	55147580	2.79235	2.07463e-06	8.73e-05	+	chr19:55084386-55150343	1.78518	0.002	0.0640251
PDCD1	5133	Hypo-down	chr2	NM_005018	diffreps_peak_19662	242793281	242793449	2.78976	2.74166e-05	0.00073907	-	chr2:242792032-242801060	-2.59201	0.0026	0.0768832
C19orf35	374872	Hyper-up	chr19	NM_198532	diffreps_peak_15203	2280901	2280934	2.78665	8.57429e-08	8.63e-06	-	chr19:2274630-2282181	2.73475	0.0004	0.0197028
HSPA1A	3303	Hyper-up	chr6	NM_005345	diffreps_peak_28814	31784521	31785400	2.78219	2.97912e-05	0.000792996	+	chr6:31777395-31785723	2.05825	5e-05	0.00352391
TRIM7	81786	Hyper-up	chr5	NM_203297	diffreps_peak_28220	180627081	180627320	2.7788	0.00833225	0.0729115	-	chr5:180618923-180632293	2.48618	0.0185	0.267609
FSTL3	10272	Hyper-up	chr19	NM_005860	diffreps_peak_15165	683141	683392	2.7782	7.87063e-10	3.69e-07	+	chr19:676391-683385	2.44066	0.00155	0.0528452
F5	2153	Hyper-up	chr1	NM_000130	diffreps_peak_2487	169510001	169511560	2.77575	1.52356e-05	0.000452893	-	chr1:169483403-169555826	2.02326	5e-05	0.00352391
ARL11	115761	Hyper-up	chr13	NM_138450	diffreps_peak_9218	50205361	50205560	2.77467	8.31065e-08	8.47e-06	+	chr13:50202434-50208008	1.99842	5e-05	0.00352391
TSHZ3	57616	Hyper-up	chr19	NM_020856	diffreps_peak_15769	31767421	31768000	2.77402	1.00919e-06	4.93e-05	-	chr19:31765850-31908700	1.76264	0.001	0.0382639
NLRC4	58484	Hyper-up	chr2	NM_021209	diffreps_peak_17048	32476481	32476670	2.76628	2.90789e-07	1.96e-05	-	chr2:32449521-32490923	2.88504	5e-05	0.00352391
LZTS3	9762	Hypo-down	chr20	NM_001282533	diffreps_peak_19791	3143262	3143360	2.76415	0.0412126	0.241538	-	chr20:3143262-3154192	-1.64955	0.0265	0.332762
UTS2	10911	Hyper-up	chr1	uc001aoq.3	diffreps_peak_144	7973240	7973294	2.7535	8.40001e-05	0.00187131	-	chr1:7844379-7913572	3.02476	0.01405	0.229209
MARCO	8685	Hyper-up	chr2	NM_006770	diffreps_peak_18236	119748164	119748209	2.74688	2.44876e-07	1.75e-05	+	chr2:119699741-119752236	2.06154	0.00105	0.0394991
PLEKHF1	79156	Hypo-down	chr19	ENST00000586888	diffreps_peak_15755	30157780	30158087	2.74259	5.67296e-08	6.64e-06	+	chr19:30155962-30166364	-1.89522	0.0006	0.0265474
DFNB31	25861	Hypo-down	chr9	NM_015404	diffreps_peak_35500	117266841	117267736	2.74083	2.6606e-07	1.85e-05	-	chr9:117164359-117267730	-2.67606	0.00895	0.173653
UTS2	10911	Hyper-up	chr1	ENST00000377516	diffreps_peak_127	7913501	7913572	2.73337	7.04191e-05	0.00161463	-	chr1:7844379-7913572	3.02476	0.01405	0.229209
PASK	23178	Hypo-down	chr2	NM_001252124	diffreps_peak_19630	242053049	242053340	2.72789	0.00217523	0.0257947	-	chr2:242045513-242123067	-2.05271	0.0083	0.16573
CREB5	9586	Hyper-up	chr7	NM_004904	diffreps_peak_30895	28843815	28844139	2.72751	8.14642e-06	0.000268388	+	chr7:28338939-28865511	2.15247	0.00015	0.00900556
RUNX3	864	Hypo-down	chr1	NM_004350	diffreps_peak_376	25226001	25226040	2.72612	2.20475e-07	1.63e-05	-	chr1:25226001-25291612	-2.35484	5e-05	0.00352391
PDE4D	5144	Hypo-down	chr5	NM_006203	diffreps_peak_26649	58271483	58271500	2.72305	2.32183e-07	1.69e-05	-	chr5:58264864-59843484	-2.24047	5e-05	0.00352391
NHSL2	340527	Hyper-up	chrX	ENST00000373677	diffreps_peak_36793	71353498	71353900	2.72018	6.84852e-09	1.7e-06	+	chrX:71130937-71363424	1.88103	5e-05	0.00352391
FSTL3	10272	Hyper-up	chr19	NM_005860	diffreps_peak_15159	677791	677860	2.72009	0.00219861	0.0260128	+	chr19:676391-683385	2.44066	0.00155	0.0528452
FCRL1	115350	Hyper-up	chr1	NM_052938	diffreps_peak_2257	157765341	157765720	2.71861	6.77656e-06	0.000230826	-	chr1:157764192-157789895	1.54938	0.0189	0.270037
TGIF1	7050	Hypo-down	chr18	NM_001278682	diffreps_peak_14464	3449441	3449640	2.7181	1.0766e-05	0.000339072	+	chr18:3411605-3458409	-1.84921	5e-05	0.00352391
FLVCR2	55640	Hyper-up	chr14	NM_017791	diffreps_peak_10483	76045181	76045580	2.71721	2.99867e-06	0.000118153	+	chr14:76041230-76550928	2.17257	0.00185	0.0604164
LRRK1	79705	Hyper-up	chr15	NM_024652	diffreps_peak_12104	101606844	101606920	2.71569	0.000285805	0.00511911	+	chr15:101389765-101626271	1.51068	0.02065	0.2861
SIRPB2	284759	Hyper-up	chr20	NM_001122962	diffreps_peak_19719	1458910	1459180	2.7154	5.50829e-08	6.54e-06	-	chr20:1422806-1472233	1.91127	0.00425	0.107645
WASF1	8936	Hyper-up	chr6	NM_003931	diffreps_peak_29673	110421821	110421882	2.71484	0.00423579	0.0431686	-	chr6:110421021-110501207	2.82737	5e-05	0.00352391
PIM1	5292	Hyper-up	chr6	NM_001243186	diffreps_peak_28928	37137921	37138400	2.70744	1.71066e-05	0.000498703	+	chr6:37137978-37143202	2.37945	5e-05	0.00352391
SLITRK4	139065	Hyper-up	chrX	NM_173078	diffreps_peak_37462	142716181	142717020	2.70401	6.13181e-05	0.00143971	-	chrX:142710595-142723596	2.658	5e-05	0.00352391
OPRL1	4987	Hyper-up	chr20	NM_000913	diffreps_peak_20442	62724181	62724306	2.69986	0.000487808	0.00788395	+	chr20:62711525-62731996	1.80872	0.00565	0.13111
GPR162	27239	Hyper-up	chr12	NM_019858	diffreps_peak_7011	6933141	6933680	2.69944	2.51246e-06	0.000102253	+	chr12:6930710-6949018	2.53854	0.00195	0.062876
HLX	3142	Hyper-up	chr1	NM_021958	diffreps_peak_3193	221054535	221054600	2.69574	1.24715e-06	5.81e-05	+	chr1:221006104-221058401	2.61868	5e-05	0.00352391
MMP25	64386	Hyper-up	chr16	NM_022468	diffreps_peak_12214	3096681	3096860	2.6933	3.03545e-06	0.000119314	+	chr16:3096681-3110727	3.06176	5e-05	0.00352391
DHRS9	10170	Hyper-up	chr2	NM_199204	diffreps_peak_18754	169952053	169952360	2.6932	0.00010312	0.00221668	+	chr2:169921298-169952677	2.15394	0.01335	0.221853
MS4A1	931	Hyper-up	chr11	NM_021950	diffreps_peak_5867	60235722	60235980	2.69261	1.44418e-05	0.000432703	+	chr11:60223224-60238233	1.59501	0.006	0.134405
SLC7A5	8140	Hypo-down	chr16	NM_003486	diffreps_peak_13088	87866581	87866631	2.69209	0.000211272	0.00399832	-	chr16:87863628-87903094	-2.74636	5e-05	0.00352391
CREB5	9586	Hyper-up	chr7	NM_004904	diffreps_peak_30896	28848803	28849031	2.68832	3.13644e-06	0.000122514	+	chr7:28338939-28865511	2.15247	0.00015	0.00900556
ZKSCAN3	80317	Hyper-up	chr6	NM_024493	diffreps_peak_28720	28333841	28334100	2.68827	1.09503e-07	1.02e-05	+	chr6:28292469-28336947	1.61446	0.027	0.336352
GCNT2	2651	Hyper-up	chr6	NM_145655	diffreps_peak_28475	10585992	10586280	2.68683	4.19078e-07	2.56e-05	+	chr6:10492455-10629601	1.97838	0.00035	0.0176295
ASGR1	432	Hyper-up	chr17	ENST00000574330	diffreps_peak_13347	7076981	7077386	2.6742	2.61111e-07	1.82e-05	-	chr17:7076749-7082883	2.04955	0.00105	0.0394991
KCTD21	283219	Hyper-up	chr11	NM_001029859	diffreps_peak_6220	77884621	77885340	2.67331	4.44475e-09	1.26e-06	-	chr11:77850816-77925757	2.22046	0.0054	0.127364
FZD2	2535	Hyper-up	chr17	NM_001466	diffreps_peak_13853	42634921	42635780	2.67188	1.27626e-06	5.91e-05	+	chr17:42634924-42636907	2.74274	0.00115	0.042367
PAQR8	85315	Hyper-up	chr6	NM_133367	diffreps_peak_29087	52269561	52270100	2.66898	1.89945e-07	1.47e-05	+	chr6:52226218-52272575	1.69273	0.0007	0.0292998
ARL11	115761	Hyper-up	chr13	NM_138450	diffreps_peak_9217	50204565	50205320	2.66395	1.89073e-10	1.42e-07	+	chr13:50202434-50208008	1.99842	5e-05	0.00352391
SGK223	157285	Hyper-up	chr8	ENST00000330777	diffreps_peak_32621	8185225	8185560	2.66386	1.09774e-09	4.68e-07	-	chr8:8175257-8244008	1.63843	0.00095	0.0369051
SPINT1	6692	Hyper-up	chr15	NM_003710	diffreps_peak_11260	41145321	41145449	2.66217	3.88405e-07	2.42e-05	+	chr15:41128005-41150405	1.57817	0.0396	0.414382
ADAMTSL4	54507	Hyper-up	chr1	NM_019032	diffreps_peak_2087	150525901	150526300	2.66173	3.86687e-06	0.000145582	+	chr1:150521039-150547028	2.39262	5e-05	0.00352391
GRASP	160622	Hypo-down	chr12	NM_181711	diffreps_peak_7786	52408661	52409100	2.66168	5.54305e-07	3.15e-05	+	chr12:52400723-52409673	-2.7205	0.0003	0.0156412
CD22	933	Hyper-up	chr19	ENST00000593867	diffreps_peak_15837	35821475	35821563	2.6557	2.79763e-06	0.000111639	+	chr19:35810163-35838264	1.96166	0.00015	0.00900556
PARM1	25849	Hyper-up	chr4	NM_015393	diffreps_peak_24776	75858401	75858580	2.65347	9.82896e-06	0.000314064	+	chr4:75858304-75975325	1.60203	0.02365	0.310761
TGIF1	7050	Hypo-down	chr18	NM_003244	diffreps_peak_14465	3450169	3450320	2.65152	4.05244e-08	5.4e-06	+	chr18:3411605-3458409	-1.84921	5e-05	0.00352391
KIR3DL1	3811	Hypo-down	chr19	NM_013289	diffreps_peak_16498	55341382	55341435	2.65138	0.00251409	0.0288952	+	chr19:55235968-55378662	-3.13025	0.01615	0.249758
AUTS2	26053	Hypo-down	chr7	NM_015570	diffreps_peak_31336	70231099	70231320	2.65098	3.07324e-06	0.000120555	+	chr7:69063904-70258054	-3.25631	5e-05	0.00352391
FCRL5	83416	Hyper-up	chr1	ENST00000368190	diffreps_peak_2235	157493600	157494100	2.64893	0.00858767	0.0745763	-	chr1:157483166-157522310	1.81325	0.0006	0.0265474
F5	2153	Hyper-up	chr1	ENST00000367796	diffreps_peak_2495	169555561	169555826	2.64507	3.98358e-07	2.47e-05	-	chr1:169483403-169555826	2.02326	5e-05	0.00352391
GBGT1	26301	Hyper-up	chr9	NM_021996	diffreps_peak_35825	136039181	136039332	2.64421	0.00441968	0.0446457	-	chr9:135973106-136039332	2.40157	0.0271	0.336739
PPFIA4	8497	Hypo-up	chr1	NM_001304331	diffreps_peak_2958	203007737	203008120	2.64286	0.00279793	0.0314099	+	chr1:202995625-203047868	2.85308	0.03245	0.371861
GRASP	160622	Hypo-down	chr12	NM_181711	diffreps_peak_7784	52400881	52401049	2.6427	2.05274e-06	8.67e-05	+	chr12:52400723-52409673	-2.7205	0.0003	0.0156412
GIMAP8	155038	Hyper-up	chr7	NM_175571	diffreps_peak_32389	150163758	150164422	2.64024	4.85567e-09	1.34e-06	+	chr7:150147717-150176480	2.42403	5e-05	0.00352391
CX3CR1	1524	Hyper-up	chr3	NM_001337	diffreps_peak_22101	39321444	39321527	2.63876	6.2472e-06	0.000215555	-	chr3:39304984-39323226	1.72386	5e-05	0.00352391
PDE4B	5142	Hypo-down	chr1	NM_002600	diffreps_peak_1035	66834469	66834652	2.63512	1.74176e-07	1.39e-05	+	chr1:66258196-66840259	-2.71101	5e-05	0.00352391
HOMEZ	57594	Hyper-up	chr14	NM_020834	diffreps_peak_9763	23744661	23745800	2.63449	1.54933e-10	1.24e-07	-	chr14:23654524-23795394	2.45124	0.0378	0.406521
MRVI1	10335	Hyper-up	chr11	NM_130385	diffreps_peak_5395	10597681	10598100	2.62984	5.7001e-07	3.21e-05	-	chr11:10562782-10715535	1.95921	0.00025	0.0135083
MARCH1	55016	Hyper-up	chr4	ENST00000514618	diffreps_peak_25980	164533441	164534190	2.62925	8.68924e-06	0.000283426	-	chr4:164445449-165305202	1.6709	0.00155	0.0528452
AUTS2	26053	Hypo-down	chr7	NM_015570	diffreps_peak_31339	70252194	70252417	2.62786	2.64875e-06	0.000106838	+	chr7:69063904-70258054	-3.25631	5e-05	0.00352391
TLR2	7097	Hyper-up	chr4	NM_003264	diffreps_peak_25876	154625901	154626500	2.62785	1.18827e-05	0.000368761	+	chr4:154622651-154626851	1.86904	5e-05	0.00352391
DUSP5	1847	Hypo-down	chr10	NM_004419	diffreps_peak_4863	112257624	112257760	2.62768	0.00265429	0.0301329	+	chr10:112257595-112271302	-1.80281	5e-05	0.00352391
OSCAR	126014	Hyper-up	chr19	NM_206818	diffreps_peak_16438	54597932	54599280	2.62453	1.88828e-07	1.47e-05	-	chr19:54597932-54606000	2.34889	5e-05	0.00352391
TEX9	374618	Hyper-up	chr15	ENST00000560827	diffreps_peak_11515	56536221	56536476	2.6234	1.60527e-08	2.95e-06	+	chr15:56536206-56757335	1.89212	0.03475	0.388725
PVR	5817	Hyper-up	chr19	NM_006505	diffreps_peak_16170	45153081	45153377	2.62101	0.0158716	0.119018	+	chr19:45041044-45222031	1.54557	0.02155	0.294688
CMTM1	113540	Hyper-up	chr16	uc010cdt.2	diffreps_peak_12784	66600295	66601080	2.62099	7.30022e-07	3.86e-05	+	chr16:66586465-66613040	2.76663	0.00595	0.133958
DUSP4	1846	Hypo-down	chr8	NM_001394	diffreps_peak_32865	29208101	29208267	2.62095	0.00378118	0.0395214	-	chr8:29190580-29208185	-3.68335	5e-05	0.00352391
GZMB	3002	Hypo-down	chr14	ENST00000526004	diffreps_peak_9798	25101041	25101324	2.61693	1.50994e-06	6.78e-05	-	chr14:25064928-25126980	-2.29267	5e-05	0.00352391
RMI1	80010	Hyper-up	chr9	NM_024945	diffreps_peak_35087	86616461	86617380	2.61689	4.50469e-10	2.57e-07	+	chr9:86595625-86618985	1.78869	0.01015	0.189513
VCAN	1462	Hyper-up	chr5	NM_004385	diffreps_peak_27082	82785916	82786100	2.61453	7.02859e-05	0.00161213	+	chr5:82767283-82878122	1.86966	0.00095	0.0369051
CXorf21	80231	Hyper-up	chrX	NM_025159	diffreps_peak_36274	30595881	30596033	2.61189	0.000391916	0.00661829	-	chrX:30576940-30595961	1.95357	5e-05	0.00352391
CHST13	166012	Hyper-up	chr3	NM_152889	diffreps_peak_23121	126261501	126261900	2.60773	1.85276e-05	0.000533178	+	chr3:126243125-126277808	2.84804	0.00885	0.173031
TMCC3	57458	Hypo-down	chr12	NM_001301036	diffreps_peak_8321	94975761	94976314	2.60677	3.81768e-07	2.4e-05	-	chr12:94960899-95044338	-2.48678	5e-05	0.00352391
VPREB3	29802	Hyper-up	chr22	NM_013378	diffreps_peak_21149	24096501	24096630	2.6063	0.0280054	0.181947	-	chr22:24094929-24096655	1.98365	0.01895	0.270534
MGST1	4257	Hyper-up	chr12	NM_020300	diffreps_peak_7257	16500576	16500644	2.59896	0.0211967	0.147802	+	chr12:16500075-16763528	1.60729	0.0112	0.198714
GCNT1	2650	Hyper-up	chr9	NM_001490	diffreps_peak_34934	79117341	79118160	2.59797	6.2229e-10	3.13e-07	+	chr9:79034751-79122332	1.90611	0.0007	0.0292998
CACNA2D2	9254	Hypo-down	chr3	NM_006030	diffreps_peak_22368	50513548	50513630	2.59706	9.8531e-06	0.000314692	-	chr3:50384760-50541675	-2.25085	0.00505	0.122847
RNASEL	6041	Hyper-up	chr1	NM_021133	diffreps_peak_2706	182555021	182555320	2.59391	1.03847e-08	2.23e-06	-	chr1:182542768-182558391	1.68347	5e-05	0.00352391
MICAL3	57553	Hyper-up	chr22	NM_015241	diffreps_peak_21021	18347701	18347752	2.59327	0.000197357	0.00378192	-	chr22:18270414-18507325	1.52187	0.03165	0.367416
MYC	4609	Hyper-up	chr8	NM_002467	diffreps_peak_33794	128752641	128753420	2.59319	1.72231e-06	7.54e-05	+	chr8:128747679-128753674	2.18312	5e-05	0.00352391
ATP10D	57205	Hyper-up	chr4	NM_020453	diffreps_peak_24536	47570853	47571000	2.58935	2.44391e-05	0.000671662	+	chr4:47487304-47595503	1.55256	0.01815	0.26419
OSBPL7	114881	Hypo-down	chr17	ENST00000392507	diffreps_peak_13922	45899031	45899200	2.58917	4.66655e-07	2.77e-05	-	chr17:45884737-45899200	-1.75786	0.0142	0.230601
DDR1	780	Hyper-up	chr6	NM_013994	diffreps_peak_28780	30865137	30865374	2.5876	0.00349026	0.0372616	+	chr6:30844197-30867933	1.63749	0.00205	0.0652742
G0S2	50486	Hypo-down	chr1	NM_015714	diffreps_peak_3081	209848669	209848780	2.58081	9.1484e-05	0.0020059	+	chr1:209834708-209908295	-2.40954	5e-05	0.00352391
TLR7	51284	Hyper-up	chrX	NM_016562	diffreps_peak_36120	12906201	12906540	2.57705	5.86936e-07	3.28e-05	+	chrX:12885201-12908499	1.66195	0.00055	0.0251463
HRH2	3274	Hyper-up	chr5	NM_022304	diffreps_peak_28117	175110881	175111260	2.57221	4.98935e-06	0.000178891	+	chr5:175085032-175113245	2.55969	5e-05	0.00352391
PPFIA4	8497	Hyper-up	chr1	uc001gzb.1	diffreps_peak_2961	203045281	203045480	2.56905	0.0290178	0.186797	+	chr1:202995625-203047868	2.85308	0.03245	0.371861
SPINT1	6692	Hyper-up	chr15	NM_003710	diffreps_peak_11258	41136861	41137140	2.56761	1.21323e-07	1.09e-05	+	chr15:41128005-41150405	1.57817	0.0396	0.414382
C9orf64	84267	Hyper-up	chr9	NM_032307	diffreps_peak_35084	86554281	86554640	2.56745	1.27906e-08	2.55e-06	-	chr9:86553225-86571901	1.94481	0.0007	0.0292998
LGMN	5641	Hyper-down	chr14	NM_005606	diffreps_peak_10652	93170151	93170260	2.56252	1.83125e-07	1.44e-05	-	chr14:93170151-93215047	-1.64708	0.0314	0.365943
CDC42EP1	11135	Hyper-up	chr22	NM_152243	diffreps_peak_21409	37964961	37965410	2.56246	0.00017357	0.00340877	+	chr22:37956453-37965412	2.74259	0.00635	0.138758
MYC	4609	Hyper-up	chr8	NM_002467	diffreps_peak_33793	128750493	128751265	2.5567	2.49393e-06	0.000101621	+	chr8:128747679-128753674	2.18312	5e-05	0.00352391
PTAFR	5724	Hyper-up	chr1	NM_000952	diffreps_peak_439	28476041	28476520	2.55513	1.49082e-06	6.71e-05	-	chr1:28473676-28520447	2.0656	5e-05	0.00352391
PIK3R1	5295	Hypo-down	chr5	NM_181504	diffreps_peak_26823	67590975	67591152	2.55432	1.02625e-05	0.000325406	+	chr5:67511547-67597649	-2.69353	5e-05	0.00352391
F5	2153	Hyper-up	chr1	NM_000130	diffreps_peak_2484	169483541	169483697	2.55409	9.24731e-07	4.61e-05	-	chr1:169483403-169555826	2.02326	5e-05	0.00352391
DDIT4	54541	Hypo-down	chr10	NM_019058	diffreps_peak_4351	74034521	74034900	2.55061	0.000474558	0.00771423	+	chr10:74033677-74035794	-2.83976	5e-05	0.00352391
PTPRO	5800	Hyper-up	chr12	NM_030670	diffreps_peak_7244	15748521	15749100	2.5489	7.82809e-10	3.67e-07	+	chr12:15260716-15750333	1.94483	0.033	0.375749
FCRLA	84824	Hyper-up	chr1	NM_032738	diffreps_peak_2371	161683001	161683300	2.54622	5.39852e-07	3.09e-05	+	chr1:161676761-161684142	1.68558	0.0041	0.104888
SIRPB1	10326	Hyper-up	chr20	NM_001135844	diffreps_peak_19740	1585387	1585620	2.54558	7.03975e-07	3.76e-05	-	chr20:1497404-1600707	1.6139	0.0019	0.0617102
TMEM176B	28959	Hyper-up	chr7	ENST00000492607	diffreps_peak_32430	150488372	150488640	2.54078	0.00254702	0.029183	-	chr7:150488372-150502208	2.43157	5e-05	0.00352391
TNFRSF10D	8793	Hyper-up	chr8	NM_003840	diffreps_peak_32772	23021441	23021543	2.54051	9.74625e-07	4.8e-05	-	chr8:22993100-23021543	1.90391	0.0001	0.0065797
SIRPB1	10326	Hyper-up	chr20	NM_001135844	diffreps_peak_19739	1584601	1584788	2.53874	5.17587e-05	0.00125039	-	chr20:1497404-1600707	1.6139	0.0019	0.0617102
S1PR5	53637	Hypo-down	chr19	NM_001166215	diffreps_peak_15449	10628499	10628580	2.53708	3.4012e-07	2.2e-05	-	chr19:10623622-10628607	-2.53694	5e-05	0.00352391
HOMEZ	57594	Hyper-up	chr14	NM_020834	diffreps_peak_9764	23746061	23746360	2.53629	2.68415e-09	8.93e-07	-	chr14:23654524-23795394	2.45124	0.0378	0.406521
SYTL2	54843	Hypo-down	chr11	ENST00000525423	diffreps_peak_6278	85438461	85438820	2.5345	4.24747e-07	2.59e-05	-	chr11:85405266-85522184	-2.31872	5e-05	0.00352391
FSTL3	10272	Hyper-up	chr19	NM_005860	diffreps_peak_15164	682721	683080	2.53076	0.000225272	0.00421612	+	chr19:676391-683385	2.44066	0.00155	0.0528452
PGBD2	267002	Hyper-up	chr1	NM_170725	diffreps_peak_3636	249212481	249212740	2.52916	3.10774e-12	1.93e-08	+	chr1:249200394-249214145	1.69802	0.00365	0.0978694
NCR3LG1	374383	Hypo-down	chr11	NM_001202439	diffreps_peak_5460	17378197	17378320	2.52848	1.72534e-06	7.55e-05	+	chr11:17373272-17398888	-1.9809	0.0011	0.0410337
IER3	8870	Hypo-down	chr6	ENST00000376377	diffreps_peak_28769	30711361	30711980	2.52828	0.000703491	0.0105557	-	chr6:30710705-30712331	-2.87719	5e-05	0.00352391
CD93	22918	Hyper-up	chr20	NM_012072	diffreps_peak_19993	23064895	23066977	2.52633	5.06248e-05	0.00122759	-	chr20:23059985-23066977	1.87959	5e-05	0.00352391
ZNF2	7549	Hyper-up	chr2	NM_001291604	diffreps_peak_17894	95847621	95848240	2.5243	1.15121e-07	1.05e-05	+	chr2:95831176-95850065	2.05164	0.0216	0.294688
PTAFR	5724	Hyper-up	chr1	NM_000952	diffreps_peak_443	28503381	28503455	2.52364	0.00570883	0.0545176	-	chr1:28473676-28520447	2.0656	5e-05	0.00352391
HIST1H3B	8358	Hypo-down	chr6	NM_003537	diffreps_peak_28666	26032221	26032288	2.52309	8.57934e-07	4.35e-05	-	chr6:26031816-26032288	-1.61863	0.0133	0.221431
CAMSAP2	23271	Hyper-up	chr1	NM_203459	diffreps_peak_2908	200823944	200824017	2.5221	0.0031882	0.0347479	+	chr1:200708685-200829832	2.25265	5e-05	0.00352391
NRG1	3084	Hyper-up	chr8	ENST00000338921	diffreps_peak_32910	32611879	32611992	2.51988	0.000235985	0.00437585	+	chr8:31496901-32622548	3.29672	5e-05	0.00352391
LINGO2	158038	Hypo-down	chr9	NM_152570	diffreps_peak_34305	27950301	27950680	2.5164	0.00604305	0.0569742	-	chr9:27948075-28670283	-3.47405	0.03215	0.370567
LILRB1	10859	Hyper-up	chr19	uc010erp.1	diffreps_peak_16475	55147681	55147880	2.51539	1.40021e-06	6.38e-05	+	chr19:55084386-55150343	1.78518	0.002	0.0640251
ARRDC2	27106	Hypo-down	chr19	ENST00000593560	diffreps_peak_15633	18119361	18119560	2.51412	4.79476e-06	0.0001734	+	chr19:18111940-18124911	-1.72415	5e-05	0.00352391
G0S2	50486	Hypo-down	chr1	NM_015714	diffreps_peak_3082	209849121	209849540	2.51305	0.00187798	0.0230141	+	chr1:209834708-209908295	-2.40954	5e-05	0.00352391
FAM114A1	92689	Hyper-up	chr4	NM_138389	diffreps_peak_24461	38930881	38930954	2.51294	0.00217645	0.0258068	+	chr4:38869297-38947360	3.56208	0.0008	0.03242
SOGA1	140710	Hyper-up	chr20	NM_080627	diffreps_peak_20139	35431258	35431510	2.51174	8.63847e-08	8.67e-06	-	chr20:35405844-35492089	1.75721	0.00015	0.00900556
LIMA1	51474	Hypo-up	chr12	NM_016357	diffreps_peak_7749	50625447	50625493	2.51149	0.0163325	0.121526	-	chr12:50569562-50677353	1.50307	0.0129	0.21741
HVCN1	84329	Hyper-up	chr12	NM_032369	diffreps_peak_8507	111086881	111087280	2.51057	1.13635e-08	2.36e-06	-	chr12:111051831-111142755	2.05634	5e-05	0.00352391
FCRL5	83416	Hyper-up	chr1	NM_031281	diffreps_peak_2232	157483721	157484120	2.51019	0.00602899	0.0568733	-	chr1:157483166-157522310	1.81325	0.0006	0.0265474
KIF19	124602	Hypo-down	chr17	NM_153209	diffreps_peak_14208	72322461	72322527	2.5067	0.00237807	0.0276597	+	chr17:72322348-72351959	-3.8019	5e-05	0.00352391
COL18A1	80781	Hyper-up	chr21	NM_030582	diffreps_peak_20925	46912600	46912627	2.5058	2.34561e-05	0.000649032	+	chr21:46825051-46964325	2.60126	0.0138	0.227209
CASC5	57082	Hypo-down	chr15	ENST00000528975	diffreps_peak_11254	40886231	40886590	2.50555	0.000282829	0.00507564	+	chr15:40886217-40956540	-2.22823	0.01055	0.192941
ARL11	115761	Hyper-up	chr13	NM_138450	diffreps_peak_9219	50205901	50206200	2.50453	1.2578e-08	2.52e-06	+	chr13:50202434-50208008	1.99842	5e-05	0.00352391
PREPL	9581	Hyper-up	chr2	ENST00000410081	diffreps_peak_17214	44588521	44588780	2.50417	2.394e-06	9.83e-05	-	chr2:44502598-44589001	1.89073	5e-05	0.00352391
SMCO4	56935	Hyper-up	chr11	ENST00000525141	diffreps_peak_6379	93232441	93232517	2.50251	0.00365095	0.0385333	-	chr11:93211637-93276674	2.33517	0.0007	0.0292998
NCR3LG1	374383	Hypo-down	chr11	NM_001202439	diffreps_peak_5462	17394261	17394600	2.50178	7.5964e-08	7.97e-06	+	chr11:17373272-17398888	-1.9809	0.0011	0.0410337
CIT	11113	Hypo-down	chr12	NM_007174	diffreps_peak_8578	120127955	120128060	2.5	0.0407337	0.239653	-	chr12:120123594-120315095	-2.06319	0.0099	0.186603
MYRF	745	Hypo-down	chr11	NM_001127392	diffreps_peak_5899	61537781	61537997	2.49727	0.0212736	0.148181	+	chr11:61447904-61634826	-4.25766	0.02095	0.288018
NR1H3	10062	Hyper-up	chr11	ENST00000467728	diffreps_peak_5751	47279701	47279960	2.49558	0.0467368	0.265113	+	chr11:47260852-47290396	1.86484	0.02705	0.336352
CREB5	9586	Hyper-up	chr7	NM_004904	diffreps_peak_30897	28858732	28858880	2.49117	5.83948e-07	3.27e-05	+	chr7:28338939-28865511	2.15247	0.00015	0.00900556
COL18A1	80781	Hyper-up	chr21	NM_030582	diffreps_peak_20932	46929981	46930175	2.49114	0.000451526	0.00741627	+	chr21:46825051-46964325	2.60126	0.0138	0.227209
BLNK	29760	Hyper-up	chr10	ENST00000495266	diffreps_peak_4700	97998643	97998820	2.49049	0.0162602	0.121084	-	chr10:97889471-98031344	2.29463	0.0287	0.349556
VEGFA	7422	Hypo-down	chr6	NM_003376	diffreps_peak_29008	43738001	43739049	2.49005	1.89713e-05	0.000543642	+	chr6:43737920-43754224	-2.4877	5e-05	0.00352391
CACNA2D2	9254	Hypo-down	chr3	NM_006030	diffreps_peak_22353	50401941	50402237	2.48754	1.64874e-07	1.34e-05	-	chr3:50384760-50541675	-2.25085	0.00505	0.122847
TNFAIP8L2	79626	Hyper-up	chr1	NM_024575	diffreps_peak_2112	151131561	151132225	2.48707	5.13039e-10	2.77e-07	+	chr1:151129104-151167797	2.19702	0.00375	0.0992081
KCNE3	10008	Hyper-up	chr11	NM_005472	diffreps_peak_6154	74167841	74168600	2.48663	1.54074e-06	6.89e-05	-	chr11:74041362-74197096	2.06148	0.0003	0.0156412
F5	2153	Hyper-up	chr1	NM_000130	diffreps_peak_2488	169511741	169512220	2.4854	1.78516e-06	7.75e-05	-	chr1:169483403-169555826	2.02326	5e-05	0.00352391
BBS10	79738	Hyper-up	chr12	NM_024685	diffreps_peak_8088	76741141	76741567	2.48433	1.306e-08	2.58e-06	-	chr12:76738253-76742222	1.66508	0.007	0.147712
FAM129C	199786	Hyper-up	chr19	NM_173544	diffreps_peak_15621	17643071	17643197	2.48323	1.75419e-06	7.65e-05	+	chr19:17634109-17664648	1.61843	0.006	0.134405
CECR6	27439	Hyper-up	chr22	NM_031890	diffreps_peak_21009	17601121	17602213	2.48188	7.3713e-06	0.000246991	-	chr22:17597188-17602257	2.57219	5e-05	0.00352391
KCNK6	9424	Hyper-up	chr19	NM_004823	diffreps_peak_15961	38818841	38819040	2.48102	4.15288e-09	1.2e-06	+	chr19:38810483-38819660	1.76182	0.00185	0.0604164
CAMSAP2	23271	Hyper-up	chr1	NM_203459	diffreps_peak_2905	200818961	200819280	2.47772	3.07312e-05	0.000812701	+	chr1:200708685-200829832	2.25265	5e-05	0.00352391
SLITRK4	139065	Hyper-up	chrX	ENST00000381779	diffreps_peak_37461	142715741	142716060	2.47677	0.00140982	0.0183618	-	chrX:142710595-142723596	2.658	5e-05	0.00352391
GLCE	26035	Hyper-up	chr15	NM_015554	diffreps_peak_11704	69561261	69561620	2.47549	4.03188e-08	5.38e-06	+	chr15:69452922-69564556	1.6585	0.0127	0.215465
KRCC1	51315	Hyper-up	chr2	NM_001304526	diffreps_peak_17835	88327181	88328104	2.47544	4.83722e-09	1.34e-06	-	chr2:88326723-88355248	1.75707	0.00015	0.00900556
TMEM176A	55365	Hyper-up	chr7	NM_018487	diffreps_peak_32433	150502081	150502208	2.47291	0.0166073	0.123087	+	chr7:150488372-150502208	2.398	0.01675	0.255055
ZC3H12A	80149	Hypo-down	chr1	NM_025079	diffreps_peak_545	37949541	37949840	2.46858	4.6829e-07	2.77e-05	+	chr1:37940152-37949980	-2.37007	5e-05	0.00352391
MYO7B	4648	Hyper-up	chr2	uc002tos.2	diffreps_peak_18331	128394381	128394580	2.46732	0.0143211	0.110018	+	chr2:128293377-128395304	2.31056	0.01855	0.267609
GIMAP8	155038	Hyper-up	chr7	NM_175571	diffreps_peak_32393	150175001	150175280	2.46549	8.62593e-11	8.47e-08	+	chr7:150147717-150176480	2.42403	5e-05	0.00352391
EBF4	57593	Hypo-down	chr20	NM_001110514	diffreps_peak_19787	2690219	2690288	2.46405	0.0492762	0.275116	+	chr20:2673523-2740753	-2.22051	0.0142	0.230601
DUSP8	1850	Hypo-down	chr11	NM_004420	diffreps_peak_5184	1593130	1593150	2.46257	1.50813e-05	0.00044935	-	chr11:1575273-1620414	-4.79925	5e-05	0.00352391
TRIM7	81786	Hyper-up	chr5	NM_033342	diffreps_peak_28222	180631588	180631820	2.46154	9.23396e-06	0.00029797	-	chr5:180618923-180632293	2.48618	0.0185	0.267609
GCSAM	257144	Hyper-up	chr3	NM_152785	diffreps_peak_22873	111842221	111842619	2.45908	7.75956e-10	3.66e-07	-	chr3:111805181-111852152	2.17774	0.0022	0.0689424
C1orf21	81563	Hypo-down	chr1	NM_030806	diffreps_peak_2734	184446701	184446737	2.45805	2.11801e-07	1.59e-05	+	chr1:184356191-184598154	-2.18359	0.0097	0.184197
SLC22A1	6580	Hyper-up	chr6	NM_003057	diffreps_peak_30373	160557601	160557682	2.45732	0.0233583	0.159032	+	chr6:160542820-160579750	4.47491	0.03445	0.386095
PAQR8	85315	Hyper-up	chr6	NM_133367	diffreps_peak_29086	52268781	52269500	2.4558	5.53621e-10	2.9e-07	+	chr6:52226218-52272575	1.69273	0.0007	0.0292998
AUTS2	26053	Hypo-down	chr7	NM_015570	diffreps_peak_31335	70229737	70229991	2.45573	1.72662e-05	0.000502278	+	chr7:69063904-70258054	-3.25631	5e-05	0.00352391
BTLA	151888	Hyper-up	chr3	NM_181780	diffreps_peak_22898	112218281	112218408	2.45455	2.09315e-09	7.4e-07	-	chr3:112182814-112218408	1.81718	0.00785	0.159242
P2RX7	5027	Hyper-up	chr12	ENST00000535250	diffreps_peak_8596	121593038	121593177	2.45434	2.48109e-06	0.000101229	+	chr12:121570621-121623876	1.56273	0.00215	0.0676131
PTAFR	5724	Hyper-up	chr1	NM_000952	diffreps_peak_441	28477381	28477570	2.4535	5.69276e-07	3.21e-05	-	chr1:28473676-28520447	2.0656	5e-05	0.00352391
MSS51	118490	Hyper-up	chr10	uc001juc.3	diffreps_peak_4386	75182761	75182960	2.45242	0.000907578	0.0129255	-	chr10:75183338-75193319	2.15627	0.00035	0.0176295
GLT1D1	144423	Hyper-up	chr12	NM_144669	diffreps_peak_8699	129469161	129469380	2.45127	7.27655e-07	3.85e-05	+	chr12:129337971-129469509	2.40462	5e-05	0.00352391
PIK3R1	5295	Hypo-down	chr5	NM_181504	diffreps_peak_26824	67593239	67593480	2.44996	3.0243e-06	0.000118975	+	chr5:67511547-67597649	-2.69353	5e-05	0.00352391
C1orf115	79762	Hyper-up	chr1	NM_024709	diffreps_peak_3181	220869953	220870560	2.44382	5.51988e-07	3.14e-05	+	chr1:220863186-220872499	1.82244	0.02585	0.328533
GCA	25801	Hyper-up	chr2	NM_012198	diffreps_peak_18686	163200582	163200680	2.44017	0.000187378	0.00362863	+	chr2:163175349-163695240	2.60928	5e-05	0.00352391
S100A8	6279	Hyper-up	chr1	NM_002964	diffreps_peak_2136	153363516	153363640	2.4397	5.25551e-06	0.000186867	-	chr1:153362507-153363664	2.62956	5e-05	0.00352391
AQP9	366	Hyper-up	chr15	NM_020980	diffreps_peak_11549	58430407	58430560	2.43522	0.000983916	0.0138066	+	chr15:58245621-58861151	2.07932	0.0005	0.0234003
TMCC3	57458	Hypo-down	chr12	NM_001301036	diffreps_peak_8318	94963801	94964100	2.43329	0.000148022	0.00299014	-	chr12:94960899-95044338	-2.48678	5e-05	0.00352391
HGF	3082	Hyper-up	chr7	NM_000601	diffreps_peak_31500	81399199	81399380	2.43296	5.53616e-07	3.14e-05	-	chr7:81328321-81399754	2.41925	0.0004	0.0197028
MNDA	4332	Hyper-up	chr1	NM_002432	diffreps_peak_2272	158813744	158813912	2.43144	3.90034e-06	0.000146666	+	chr1:158801106-158819296	2.08629	5e-05	0.00352391
S1PR5	53637	Hypo-down	chr19	NM_030760	diffreps_peak_15445	10623541	10624060	2.43126	4.14203e-06	0.00015388	-	chr19:10623622-10628607	-2.53694	5e-05	0.00352391
DDIT4	54541	Hypo-down	chr10	NM_019058	diffreps_peak_4350	74033676	74033780	2.43074	7.63621e-05	0.00172898	+	chr10:74033677-74035794	-2.83976	5e-05	0.00352391
ATP10D	57205	Hyper-up	chr4	NM_020453	diffreps_peak_24533	47559861	47560260	2.42855	9.25328e-08	9.05e-06	+	chr4:47487304-47595503	1.55256	0.01815	0.26419
TCL1A	8115	Hyper-up	chr14	NM_021966	diffreps_peak_10705	96176303	96176580	2.42791	1.50734e-06	6.77e-05	-	chr14:96176303-96223993	1.99261	0.0001	0.0065797
LAIR2	3904	Hypo-down	chr19	NM_002288	diffreps_peak_16461	55021741	55021900	2.42732	0.0171002	0.12587	+	chr19:55009099-55021897	-2.46135	0.02325	0.307545
SMCO4	56935	Hypo-up	chr11	NM_020179	diffreps_peak_6380	93276461	93276546	2.42657	0.0370264	0.223735	-	chr11:93211637-93276674	2.33517	0.0007	0.0292998
SPINT1	6692	Hyper-up	chr15	NM_003710	diffreps_peak_11261	41145686	41145825	2.4253	4.31462e-07	2.61e-05	+	chr15:41128005-41150405	1.57817	0.0396	0.414382
MNDA	4332	Hyper-up	chr1	NM_002432	diffreps_peak_2271	158813068	158813205	2.42517	6.43608e-06	0.000221041	+	chr1:158801106-158819296	2.08629	5e-05	0.00352391
TLR7	51284	Hyper-up	chrX	NM_016562	diffreps_peak_36118	12903630	12904640	2.42478	1.50462e-06	6.76e-05	+	chrX:12885201-12908499	1.66195	0.00055	0.0251463
MNDA	4332	Hyper-up	chr1	NM_002432	diffreps_peak_2273	158815401	158815780	2.41984	5.60046e-06	0.000197237	+	chr1:158801106-158819296	2.08629	5e-05	0.00352391
RGPD5	84220	Hypo-down	chr2	NM_005054	diffreps_peak_18110	110585368	110585548	2.41901	6.01171e-07	3.34e-05	+	chr2:110550334-110615272	-2.32109	0.03115	0.364327
KCNJ15	3772	Hyper-up	chr21	NM_002243	diffreps_peak_20742	39671165	39671380	2.41472	6.04802e-06	0.000209928	+	chr21:39493544-39679279	3.64162	5e-05	0.00352391
MYO7B	4648	Hyper-up	chr2	NM_001080527	diffreps_peak_18330	128394119	128394203	2.41281	5.35476e-05	0.00128651	+	chr2:128293377-128395304	2.31056	0.01855	0.267609
PPP1R26	9858	Hyper-up	chr9	NM_014811	diffreps_peak_35868	138376561	138377280	2.40962	2.87474e-07	1.95e-05	+	chr9:138354572-138380739	1.75463	0.01235	0.21154
TDRD9	122402	Hyper-up	chr14	NM_153046	diffreps_peak_10841	104431781	104431891	2.40832	0.000131302	0.00271285	+	chr14:104394798-104519004	3.24662	0.0001	0.0065797
IL23A	51561	Hypo-down	chr12	NM_016584	diffreps_peak_7838	56733726	56733840	2.40567	4.38963e-06	0.000161119	+	chr12:56732662-56734193	-2.28506	0.0106	0.193305
TNF	7124	Hypo-down	chr6	NM_000594	diffreps_peak_28805	31543343	31543640	2.40465	7.89379e-06	0.000261526	+	chr6:31543343-31546113	-2.22948	5e-05	0.00352391
C1orf21	81563	Hypo-down	chr1	NM_030806	diffreps_peak_2737	184476721	184476816	2.40239	1.98989e-07	1.52e-05	+	chr1:184356191-184598154	-2.18359	0.0097	0.184197
FRMPD3	84443	Hypo-down	chrX	NM_032428	diffreps_peak_37202	106845221	106845560	2.40127	0.0195698	0.139213	+	chrX:106756212-106848481	-1.93716	0.014	0.228812
ALPK1	80216	Hyper-up	chr4	NM_025144	diffreps_peak_25346	113353181	113353560	2.39731	1.43686e-08	2.72e-06	+	chr4:113195697-113363776	1.73098	0.0011	0.0410337
ZKSCAN3	80317	Hyper-up	chr6	NM_024493	diffreps_peak_28719	28333241	28333440	2.39644	6.05747e-07	3.36e-05	+	chr6:28292469-28336947	1.61446	0.027	0.336352
CX3CR1	1524	Hyper-up	chr3	NM_001337	diffreps_peak_22099	39305361	39305700	2.39348	2.68722e-07	1.86e-05	-	chr3:39304984-39323226	1.72386	5e-05	0.00352391
S100A8	6279	Hyper-up	chr1	NM_002964	diffreps_peak_2135	153362507	153362580	2.38912	2.65041e-05	0.000718416	-	chr1:153362507-153363664	2.62956	5e-05	0.00352391
OLIG1	116448	Hyper-up	chr21	NM_138983	diffreps_peak_20652	34442449	34443740	2.3873	2.89992e-06	0.000115009	+	chr21:34285956-34444726	2.05356	0.0104	0.192567
CD83	9308	Hypo-down	chr6	NM_004233	diffreps_peak_28524	14135761	14136300	2.38639	0.000134761	0.00277279	+	chr6:14117871-14137149	-2.77914	5e-05	0.00352391
DACT1	51339	Hyper-up	chr14	NM_016651	diffreps_peak_10151	59113421	59113880	2.38504	0.00137372	0.0179855	+	chr14:59100684-59115039	2.60799	0.0002	0.0113213
VCAN	1462	Hyper-up	chr5	NM_004385	diffreps_peak_27088	82876125	82876280	2.38415	4.92966e-05	0.00120053	+	chr5:82767283-82878122	1.86966	0.00095	0.0369051
ZSWIM3	140831	Hyper-up	chr20	NM_080752	diffreps_peak_20264	44486521	44486619	2.38409	0.000105825	0.00226502	+	chr20:44486255-44507761	2.17225	0.01705	0.256989
USP36	57602	Hypo-down	chr17	NM_025090	diffreps_peak_14324	76794521	76794633	2.37999	4.48323e-07	2.69e-05	-	chr17:76783462-76837523	-1.91919	5e-05	0.00352391
PAX5	5079	Hyper-up	chr9	NM_016734	diffreps_peak_34466	36839261	36839840	2.37916	3.90189e-06	0.000146697	-	chr9:36833271-37034103	2.14179	5e-05	0.00352391
SH2D3C	10044	Hyper-up	chr9	NM_005489	diffreps_peak_35732	130501960	130502020	2.37523	0.000865514	0.0124444	-	chr9:130500595-130541020	1.77989	5e-05	0.00352391
RORA	6095	Hypo-down	chr15	NM_002943	diffreps_peak_11600	60780482	60780740	2.3752	0.00153507	0.0196473	-	chr15:60771376-61521518	-1.73856	5e-05	0.00352391
NDUFA8	4702	Hyper-up	chr9	NM_014222	diffreps_peak_35613	124921941	124922098	2.37385	0.0021941	0.0259692	-	chr9:124894744-124922098	1.52716	0.03865	0.409531
GLT1D1	144423	Hyper-up	chr12	NM_144669	diffreps_peak_8698	129467473	129467900	2.37338	1.78851e-06	7.76e-05	+	chr12:129337971-129469509	2.40462	5e-05	0.00352391
RNF125	54941	Hypo-down	chr18	NM_017831	diffreps_peak_14666	29598601	29598900	2.37064	6.4424e-09	1.64e-06	+	chr18:29598334-30050447	-1.66718	0.0147	0.236567
TLR8	51311	Hyper-up	chrX	NM_016610	diffreps_peak_36124	12939241	12939540	2.37052	9.82719e-06	0.00031405	+	chrX:12920935-12961419	1.80269	5e-05	0.00352391
MYOF	26509	Hyper-up	chr10	NM_013451	diffreps_peak_4644	95242041	95242074	2.3704	0.0225493	0.154874	-	chr10:95066185-95242074	1.53691	0.0093	0.179662
LRRK2	120892	Hyper-up	chr12	uc001rmh.1	diffreps_peak_7570	40698061	40698260	2.36936	1.67014e-05	0.000489099	+	chr12:40579810-40763087	1.66196	5e-05	0.00352391
C1orf21	81563	Hypo-down	chr1	NM_030806	diffreps_peak_2742	184594501	184594780	2.3683	2.08694e-07	1.57e-05	+	chr1:184356191-184598154	-2.18359	0.0097	0.184197
DNASE1	1773	Hyper-up	chr16	NM_005223	diffreps_peak_12242	3702939	3703300	2.3679	1.16586e-08	2.39e-06	+	chr16:3661728-3767598	2.1302	0.0071	0.148941
PPP1R16B	26051	Hypo-down	chr20	NM_015568	diffreps_peak_20187	37547541	37547740	2.3678	8.90901e-07	4.48e-05	+	chr20:37434347-37551667	-2.02421	5e-05	0.00352391
DUSP4	1846	Hypo-down	chr8	NM_001394	diffreps_peak_32864	29207481	29208020	2.36323	0.000478097	0.00775934	-	chr8:29190580-29208185	-3.68335	5e-05	0.00352391
RNF165	494470	Hypo-down	chr18	NM_152470	diffreps_peak_14821	44015251	44015359	2.36283	0.0166711	0.12344	+	chr18:43906771-44043103	-2.2128	0.00555	0.130042
SSTR3	6753	Hyper-up	chr22	NM_001051	diffreps_peak_21389	37602401	37602880	2.35966	3.90321e-05	0.000989031	-	chr22:37600277-37608362	1.82113	0.01555	0.243649
TLR8	51311	Hyper-up	chrX	NM_016610	diffreps_peak_36125	12939581	12940160	2.35885	6.38839e-06	0.000219663	+	chrX:12920935-12961419	1.80269	5e-05	0.00352391
PDE4B	5142	Hypo-down	chr1	NM_002600	diffreps_peak_1036	66837995	66838800	2.35848	5.18897e-06	0.000184921	+	chr1:66258196-66840259	-2.71101	5e-05	0.00352391
ANKRD50	57182	Hyper-up	chr4	NM_020337	diffreps_peak_25454	125590241	125590700	2.35842	7.73272e-07	4.02e-05	-	chr4:125585206-125633887	1.84036	5e-05	0.00352391
TMTC2	160335	Hyper-up	chr12	NM_152588	diffreps_peak_8190	83525988	83526480	2.35708	1.356e-07	1.18e-05	+	chr12:83080658-83528649	1.80541	5e-05	0.00352391
TCTN1	79600	Hyper-up	chr12	ENST00000550703	diffreps_peak_8504	111066821	111067240	2.35589	0.001104	0.0150945	+	chr12:111051831-111142755	2.18657	0.01055	0.192941
ZBTB21	49854	Hypo-down	chr21	NM_020727	diffreps_peak_20775	43412701	43413080	2.35534	9.20433e-07	4.6e-05	-	chr21:43406939-43445060	-1.88714	0.0193	0.27356
KIAA1107	23285	Hyper-up	chr1	NM_015237	diffreps_peak_1389	92646021	92646600	2.35519	3.31399e-10	2.12e-07	+	chr1:92632541-92650280	1.5632	0.02165	0.294688
PIK3R1	5295	Hypo-down	chr5	NM_181504	diffreps_peak_26825	67593681	67594300	2.35357	7.06727e-06	0.00023873	+	chr5:67511547-67597649	-2.69353	5e-05	0.00352391
TSHZ3	57616	Hyper-up	chr19	NM_020856	diffreps_peak_15778	31840085	31840190	2.35304	7.33562e-07	3.88e-05	-	chr19:31765850-31908700	1.76264	0.001	0.0382639
IMPA2	3613	Hyper-up	chr18	NM_014214	diffreps_peak_14560	12028901	12028992	2.35157	2.45735e-08	3.92e-06	+	chr18:11981023-12030876	1.832	0.00015	0.00900556
CDC42EP1	11135	Hyper-up	chr22	NM_152243	diffreps_peak_21408	37964114	37964880	2.35034	0.00119356	0.0160711	+	chr22:37956453-37965412	2.74259	0.00635	0.138758
SYAP1	94056	Hypo-down	chrX	NM_032796	diffreps_peak_36160	16774785	16774800	2.34982	1.68436e-07	1.36e-05	+	chrX:16737706-16783459	-2.46128	0.00935	0.180227
GPR162	27239	Hyper-up	chr12	ENST00000382315	diffreps_peak_7014	6936201	6936586	2.34873	8.14268e-07	4.19e-05	+	chr12:6930710-6949018	2.53854	0.00195	0.062876
KCNK6	9424	Hyper-up	chr19	NM_004823	diffreps_peak_15959	38817261	38817600	2.34764	0.000245888	0.00452648	+	chr19:38810483-38819660	1.76182	0.00185	0.0604164
JUN	3725	Hypo-down	chr1	NM_002228	diffreps_peak_911	59249561	59249785	2.34426	0.000479595	0.00778027	-	chr1:59246464-59249785	-2.24638	5e-05	0.00352391
AUTS2	26053	Hypo-down	chr7	NM_015570	diffreps_peak_31334	70227855	70228327	2.34169	0.000643245	0.00982708	+	chr7:69063904-70258054	-3.25631	5e-05	0.00352391
NHSL2	340527	Hyper-up	chrX	NM_001013627	diffreps_peak_36796	71363102	71363424	2.33999	4.15548e-07	2.55e-05	+	chrX:71130937-71363424	1.88103	5e-05	0.00352391
MYC	4609	Hyper-up	chr8	ENST00000259523	diffreps_peak_33791	128748101	128748720	2.33928	5.41411e-07	3.1e-05	+	chr8:128747679-128753674	2.18312	5e-05	0.00352391
NLRP12	91662	Hyper-up	chr19	NM_144687	diffreps_peak_16425	54313381	54313620	2.33697	1.49449e-07	1.26e-05	-	chr19:54296854-54327657	1.78706	5e-05	0.00352391
SLC25A37	51312	Hyper-up	chr8	NM_016612	diffreps_peak_32794	23428847	23429580	2.33671	2.67165e-06	0.000107538	+	chr8:23386317-23432976	2.08586	5e-05	0.00352391
S1PR5	53637	Hypo-down	chr19	NM_030760	diffreps_peak_15446	10624081	10625160	2.33639	7.65932e-06	0.000254941	-	chr19:10623622-10628607	-2.53694	5e-05	0.00352391
PAX5	5079	Hyper-up	chr9	uc011lqd.1	diffreps_peak_34488	37026529	37026572	2.33621	0.000554854	0.00873592	-	chr9:36833271-37034103	2.14179	5e-05	0.00352391
LGR6	59352	Hypo-down	chr1	NM_021636	diffreps_peak_2944	202287641	202287840	2.3343	0.00316021	0.0345223	+	chr1:202163028-202288909	-2.53838	5e-05	0.00352391
CCIN	881	Hyper-up	chr9	NM_005893	diffreps_peak_34450	36170961	36171331	2.33422	2.26911e-07	1.66e-05	+	chr9:36169388-36171329	3.13216	0.005	0.12213
CD22	933	Hyper-up	chr19	NM_001771	diffreps_peak_15843	35837468	35838080	2.33378	7.4446e-06	0.000248919	+	chr19:35810163-35838264	1.96166	0.00015	0.00900556
CR2	1380	Hyper-up	chr1	NM_001877	diffreps_peak_3023	207658808	207658917	2.3317	0.000389247	0.00658332	+	chr1:207627574-207663240	1.95341	0.0079	0.159711
PASK	23178	Hypo-down	chr2	NM_015148	diffreps_peak_19631	242076418	242076679	2.33123	1.23549e-07	1.1e-05	-	chr2:242045513-242123067	-2.05271	0.0083	0.16573
MICAL3	57553	Hyper-up	chr22	NM_015241	diffreps_peak_21017	18270461	18270960	2.33108	2.20411e-07	1.63e-05	-	chr22:18270414-18507325	1.52187	0.03165	0.367416
SYTL2	54843	Hypo-down	chr11	ENST00000525423	diffreps_peak_6277	85437641	85438440	2.32823	2.97008e-07	2e-05	-	chr11:85405266-85522184	-2.31872	5e-05	0.00352391
MARCH1	55016	Hyper-up	chr4	NM_017923	diffreps_peak_25966	164449641	164450020	2.3255	2.13586e-06	8.94e-05	-	chr4:164445449-165305202	1.6709	0.00155	0.0528452
TLR8	51311	Hyper-up	chrX	NM_016610	diffreps_peak_36123	12937162	12937820	2.32533	1.17647e-05	0.000365603	+	chrX:12920935-12961419	1.80269	5e-05	0.00352391
VENTX	27287	Hyper-up	chr10	NM_014468	diffreps_peak_5099	135055321	135055434	2.32487	0.00166631	0.0209566	+	chr10:135050907-135055433	1.52622	0.00875	0.171452
CAMSAP2	23271	Hyper-up	chr1	NM_203459	diffreps_peak_2904	200818061	200818540	2.32412	1.5395e-07	1.28e-05	+	chr1:200708685-200829832	2.25265	5e-05	0.00352391
SERPINA1	5265	Hyper-up	chr14	NM_000295	diffreps_peak_10672	94854896	94855020	2.32328	1.2649e-06	5.87e-05	-	chr14:94843083-94857030	1.89995	5e-05	0.00352391
SH2D2A	9047	Hypo-down	chr1	NM_003975	diffreps_peak_2213	156786466	156786640	2.32308	6.40536e-08	7.18e-06	-	chr1:156776034-156851642	-3.13657	5e-05	0.00352391
CRISPLD2	83716	Hyper-up	chr16	ENST00000566789	diffreps_peak_13042	84882941	84883123	2.32286	5.78227e-07	3.24e-05	+	chr16:84853589-84954374	1.76963	5e-05	0.00352391
GAS6	2621	Hyper-up	chr13	NM_000820	diffreps_peak_9672	114566547	114566714	2.32249	0.00240625	0.0279096	-	chr13:114518582-114567046	2.23383	0.0101	0.188975
PER1	5187	Hypo-down	chr17	NM_002616	diffreps_peak_13374	8046701	8047194	2.32241	0.000820933	0.0119324	-	chr17:8043787-8066864	-2.03421	0.0057	0.13111
ZNF717	100131827	Hyper-up	chr3	NM_001128223	diffreps_peak_22662	75788261	75788496	2.32216	0.000266342	0.00482983	-	chr3:75758793-75834734	1.54032	0.04215	0.43072
PTAFR	5724	Hyper-up	chr1	NM_000952	diffreps_peak_442	28503102	28503320	2.32152	2.54108e-07	1.79e-05	-	chr1:28473676-28520447	2.0656	5e-05	0.00352391
CD200	4345	Hyper-up	chr3	NM_005944	diffreps_peak_22878	112066404	112066420	2.32045	0.000588648	0.00915486	+	chr3:112021324-112081659	2.11695	0.01275	0.215698
AGPAT4	56895	Hypo-down	chr6	NM_020133	diffreps_peak_30389	161653067	161653260	2.31967	3.05786e-07	2.03e-05	-	chr6:161551010-161695093	-1.53654	0.0482	0.46675
DISC1	27185	Hyper-up	chr1	NM_018662	diffreps_peak_3414	231885671	231885780	2.31801	6.03089e-05	0.00142095	+	chr1:231664398-232177019	1.68019	0.01005	0.188435
DISC1	27185	Hyper-up	chr1	NM_018662	diffreps_peak_3407	231830321	231830551	2.31746	4.66028e-06	0.000169237	+	chr1:231664398-232177019	1.68019	0.01005	0.188435
PHLDA1	22822	Hypo-down	chr12	NM_007350	diffreps_peak_8083	76423701	76423872	2.31506	1.25955e-06	5.85e-05	-	chr12:76419226-76427712	-2.59298	5e-05	0.00352391
ZC3H12A	80149	Hypo-down	chr1	NM_025079	diffreps_peak_542	37940118	37940230	2.31478	2.53221e-07	1.79e-05	+	chr1:37940152-37949980	-2.37007	5e-05	0.00352391
OLFM2	93145	Hyper-up	chr19	NM_058164	diffreps_peak_15426	9968390	9968537	2.31422	1.67178e-06	7.36e-05	-	chr19:9964393-10047228	2.33498	0.0267	0.334331
GBGT1	26301	Hyper-up	chr9	NM_021996	diffreps_peak_35823	136036901	136036919	2.31358	6.29936e-05	0.00147284	-	chr9:135973106-136039332	2.40157	0.0271	0.336739
TRIM25	7706	Hyper-up	chr17	NM_005082	diffreps_peak_14003	54969201	54969590	2.31291	1.96882e-05	0.000561102	-	chr17:54965269-54991399	1.84886	0.0068	0.145755
EBF4	57593	Hypo-down	chr20	NM_001110514	diffreps_peak_19786	2686619	2686683	2.31282	0.0215749	0.149816	+	chr20:2673523-2740753	-2.22051	0.0142	0.230601
CEACAM3	1084	Hyper-up	chr19	NM_001815	diffreps_peak_16085	42301520	42301600	2.3125	0.000517229	0.00826484	+	chr19:42300368-42315591	3.22274	0.0049	0.121014
CX3CR1	1524	Hyper-up	chr3	NM_001337	diffreps_peak_22100	39307421	39307780	2.3091	3.87852e-08	5.25e-06	-	chr3:39304984-39323226	1.72386	5e-05	0.00352391
DNASE1	1773	Hyper-up	chr16	NM_005223	diffreps_peak_12244	3704421	3704800	2.30845	0.000408288	0.0068351	+	chr16:3661728-3767598	2.1302	0.0071	0.148941
PCDH9	5101	Hyper-up	chr13	NM_020403	diffreps_peak_9328	67801821	67802707	2.30745	1.48793e-06	6.7e-05	-	chr13:66876965-67804468	2.06282	0.00015	0.00900556
POU2F2	5452	Hyper-up	chr19	NM_002698	diffreps_peak_16098	42594741	42595740	2.30729	8.51435e-09	1.97e-06	-	chr19:42590262-42700737	1.72753	0.00065	0.0280633
AIM2	9447	Hyper-up	chr1	NM_004833	diffreps_peak_2280	159035699	159036060	2.30728	3.28232e-07	2.14e-05	-	chr1:159032273-159116886	1.92753	0.0102	0.190048
ZBTB21	49854	Hypo-down	chr21	NM_020727	diffreps_peak_20774	43412121	43412680	2.30674	2.03967e-06	8.63e-05	-	chr21:43406939-43445060	-1.88714	0.0193	0.27356
MSRB1	51734	Hyper-up	chr16	ENST00000399753	diffreps_peak_12187	1991181	1991406	2.30551	1.06491e-06	5.15e-05	-	chr16:1988210-1993327	2.1579	5e-05	0.00352391
LGMN	5641	Hyper-down	chr14	NM_005606	diffreps_peak_10653	93170661	93170706	2.30364	0.000400784	0.00673868	-	chr14:93170151-93215047	-1.64708	0.0314	0.365943
CYP1B1	1545	Hyper-up	chr2	NM_000104	diffreps_peak_17128	38297861	38298453	2.30262	0.00177215	0.0219867	-	chr2:38150329-38408997	1.55257	0.0013	0.0464535
ZC3H12A	80149	Hypo-down	chr1	NM_025079	diffreps_peak_544	37948541	37949300	2.3009	2.4061e-06	9.87e-05	+	chr1:37940152-37949980	-2.37007	5e-05	0.00352391
MARCO	8685	Hyper-up	chr2	NM_006770	diffreps_peak_18232	119735403	119735511	2.30059	0.000220244	0.00413828	+	chr2:119699741-119752236	2.06154	0.00105	0.0394991
CIT	11113	Hypo-down	chr12	NM_007174	diffreps_peak_8580	120204890	120204986	2.30017	0.0011091	0.0151512	-	chr12:120123594-120315095	-2.06319	0.0099	0.186603
SYTL3	94120	Hypo-down	chr6	NM_001242394	diffreps_peak_30327	159084101	159084320	2.30007	1.17673e-05	0.000365654	+	chr6:159071045-159185908	-1.86718	0.0005	0.0234003
PPP1R26	9858	Hyper-up	chr9	NM_014811	diffreps_peak_35865	138371647	138371800	2.29949	0.0364999	0.22157	+	chr9:138354572-138380739	1.75463	0.01235	0.21154
PIK3R1	5295	Hypo-down	chr5	NM_181504	diffreps_peak_26822	67589541	67589662	2.29866	2.89785e-06	0.00011496	+	chr5:67511547-67597649	-2.69353	5e-05	0.00352391
HVCN1	84329	Hyper-up	chr12	ENST00000356742	diffreps_peak_8513	111126101	111126514	2.2961	3.18082e-08	4.63e-06	-	chr12:111051831-111142755	2.05634	5e-05	0.00352391
CBFA2T3	863	Hyper-up	chr16	NM_005187	diffreps_peak_13139	88941262	88941540	2.29464	4.72984e-09	1.32e-06	-	chr16:88941265-89043612	1.60322	0.0011	0.0410337
TMTC2	160335	Hyper-up	chr12	NM_152588	diffreps_peak_8162	83289801	83290260	2.29295	2.33493e-06	9.63e-05	+	chr12:83080658-83528649	1.80541	5e-05	0.00352391
SERTAD1	29950	Hypo-down	chr19	NM_013376	diffreps_peak_16029	40931773	40931932	2.29011	4.18297e-07	2.56e-05	-	chr19:40927498-40931932	-1.74612	0.00345	0.0936331
OLFM2	93145	Hyper-up	chr19	NM_058164	diffreps_peak_15425	9964941	9965520	2.28998	3.18705e-07	2.09e-05	-	chr19:9964393-10047228	2.33498	0.0267	0.334331
SOGA1	140710	Hyper-up	chr20	uc021wcy.1	diffreps_peak_20138	35421421	35422960	2.28943	4.04978e-07	2.49e-05	-	chr20:35405844-35492089	1.75721	0.00015	0.00900556
CASZ1	54897	Hypo-down	chr1	NM_017766	diffreps_peak_192	10715705	10715870	2.28925	2.47406e-07	1.76e-05	-	chr1:10696660-10856707	-1.95734	0.01525	0.24128
SYTL2	54843	Hypo-down	chr11	ENST00000525423	diffreps_peak_6276	85436761	85437620	2.28799	1.35821e-06	6.22e-05	-	chr11:85405266-85522184	-2.31872	5e-05	0.00352391
FAM46C	54855	Hypo-down	chr1	NM_017709	diffreps_peak_1756	118166001	118166660	2.2879	9.87115e-06	0.000315157	+	chr1:118148555-118170994	-2.22995	5e-05	0.00352391
CRISPLD2	83716	Hyper-up	chr16	NM_031476	diffreps_peak_13041	84872027	84872120	2.28608	0.000816304	0.0118775	+	chr16:84853589-84954374	1.76963	5e-05	0.00352391
NUDT16	131870	Hyper-up	chr3	NM_152395	diffreps_peak_23228	131102161	131102360	2.28198	8.99982e-07	4.52e-05	+	chr3:131100514-131107674	1.61444	0.0045	0.112066
SH2D3C	10044	Hyper-up	chr9	NM_005489	diffreps_peak_35737	130511489	130511640	2.28104	4.27341e-07	2.6e-05	-	chr9:130500595-130541020	1.77989	5e-05	0.00352391
TCEANC2	127428	Hyper-up	chr1	ENST00000234827	diffreps_peak_867	54561957	54562640	2.28043	5.63831e-09	1.49e-06	+	chr1:54519259-54578192	1.64174	0.012	0.20774
BATF	10538	Hyper-up	chr14	NM_006399	diffreps_peak_10476	75988783	75989088	2.27747	9.56057e-07	4.73e-05	+	chr14:75988767-76013358	1.57764	0.01505	0.239818
MARCH1	55016	Hyper-up	chr4	NM_017923	diffreps_peak_25981	164534641	164534776	2.27723	2.85076e-06	0.000113424	-	chr4:164445449-165305202	1.6709	0.00155	0.0528452
CD300C	10871	Hyper-up	chr17	NM_006678	diffreps_peak_14215	72537261	72537620	2.27722	6.21956e-09	1.59e-06	-	chr17:72537246-72542282	1.6043	0.00275	0.080123
FAM63A	55793	Hyper-up	chr1	NM_018379	diffreps_peak_2108	150974200	150974258	2.27448	0.00167307	0.0210162	-	chr1:150969024-150980851	1.60839	0.00135	0.047667
LILRA2	11027	Hyper-up	chr19	uc010yfe.1	diffreps_peak_16466	55098476	55098574	2.27278	2.09495e-05	0.000590802	+	chr19:55084386-55150343	1.67122	0.0318	0.36796
RPGRIP1	57096	Hyper-up	chr14	NM_020366	diffreps_peak_9728	21792841	21793229	2.27143	2.59087e-05	0.000705243	+	chr14:21756097-21819460	2.59391	0.00105	0.0394991
NR4A1	3164	Hypo-down	chr12	NM_002135	diffreps_peak_7790	52452471	52453040	2.26987	4.71869e-06	0.000171038	+	chr12:52416615-52453291	-2.25073	0.0003	0.0156412
SIGLEC9	27180	Hyper-up	chr19	NM_014441	diffreps_peak_16339	51633147	51633500	2.26984	3.01546e-07	2.01e-05	+	chr19:51628164-51639908	2.00361	5e-05	0.00352391
GAPT	202309	Hyper-up	chr5	NM_152687	diffreps_peak_26637	57790421	57791340	2.26965	4.69367e-07	2.78e-05	+	chr5:57787261-57792917	1.87759	0.00015	0.00900556
GAPT	202309	Hyper-up	chr5	NM_152687	diffreps_peak_26635	57787261	57787368	2.26543	2.57055e-08	4.03e-06	+	chr5:57787261-57792917	1.87759	0.00015	0.00900556
CAMSAP2	23271	Hyper-up	chr1	NM_203459	diffreps_peak_2909	200826881	200827360	2.26437	2.89262e-07	1.96e-05	+	chr1:200708685-200829832	2.25265	5e-05	0.00352391
MYBL1	4603	Hypo-down	chr8	NM_001080416	diffreps_peak_33144	67514652	67514758	2.26094	1.07625e-06	5.19e-05	-	chr8:67474409-67526482	-1.72855	5e-05	0.00352391
TNFSF10	8743	Hyper-up	chr3	NM_003810	diffreps_peak_23675	172241261	172241297	2.26056	0.0297786	0.190611	-	chr3:172223297-172241297	2.47881	5e-05	0.00352391
RPP25L	138716	Hyper-up	chr9	NM_148178	diffreps_peak_34422	34610721	34611120	2.25976	2.92291e-11	4.96e-08	-	chr9:34610482-34612101	1.59969	0.0396	0.414382
CYP1B1	1545	Hyper-up	chr2	NM_000104	diffreps_peak_17129	38303221	38303323	2.25962	0.00374832	0.0392798	-	chr2:38150329-38408997	1.55257	0.0013	0.0464535
FUCA1	2517	Hyper-up	chr1	NM_000147	diffreps_peak_349	24171841	24172345	2.25845	2.94747e-06	0.000116513	-	chr1:24171566-24194859	1.867	0.00015	0.00900556
LMO2	4005	Hyper-up	chr11	NM_005574	diffreps_peak_5624	33880561	33880820	2.25759	5.86937e-07	3.28e-05	-	chr11:33880121-33913836	1.90051	5e-05	0.00352391
ITPRIPL2	162073	Hyper-up	chr16	NM_001034841	diffreps_peak_12419	19130381	19130800	2.25714	1.07893e-09	4.62e-07	+	chr16:19125253-19279652	1.64006	5e-05	0.00352391
FBN2	2201	Hyper-up	chr5	NM_001999	diffreps_peak_27592	127595021	127595521	2.25598	1.2543e-06	5.83e-05	-	chr5:127593600-128369335	1.87309	0.0003	0.0156412
SH2D3C	10044	Hyper-up	chr9	NM_005489	diffreps_peak_35731	130500781	130501200	2.25591	1.75641e-07	1.4e-05	-	chr9:130500595-130541020	1.77989	5e-05	0.00352391
DISC1	27185	Hyper-up	chr1	NM_018662	diffreps_peak_3406	231829571	231829740	2.25539	4.96456e-07	2.9e-05	+	chr1:231664398-232177019	1.68019	0.01005	0.188435
KCNE3	10008	Hyper-up	chr11	NM_005472	diffreps_peak_6158	74178481	74178600	2.25376	0.0157637	0.118393	-	chr11:74041362-74197096	2.06148	0.0003	0.0156412
NLRC4	58484	Hyper-up	chr2	NM_001199138	diffreps_peak_17049	32489861	32489949	2.25147	0.000405643	0.0067996	-	chr2:32449521-32490923	2.88504	5e-05	0.00352391
ERMN	57471	Hypo-down	chr2	NM_020711	diffreps_peak_18617	158181181	158181274	2.24964	1.27401e-06	5.9e-05	-	chr2:158175136-158184225	-2.71167	5e-05	0.00352391
KIAA0895L	653319	Hyper-up	chr16	NM_001040715	diffreps_peak_12804	67209881	67210180	2.24533	0.000398911	0.00671412	-	chr16:67204056-67224107	1.71449	0.0369	0.401687
NLRP12	91662	Hyper-up	chr19	NM_144687	diffreps_peak_16426	54314121	54314520	2.24522	3.81633e-07	2.4e-05	-	chr19:54296854-54327657	1.78706	5e-05	0.00352391
NCR3LG1	374383	Hypo-down	chr11	NM_001202439	diffreps_peak_5463	17398261	17398640	2.24441	0.000356225	0.00612876	+	chr11:17373272-17398888	-1.9809	0.0011	0.0410337
MSRB1	51734	Hyper-up	chr16	NM_016332	diffreps_peak_12188	1993102	1993280	2.24312	5.0718e-07	2.95e-05	-	chr16:1988210-1993327	2.1579	5e-05	0.00352391
SIRPA	140885	Hyper-up	chr20	NM_080792	diffreps_peak_19776	1917965	1919020	2.24272	1.47767e-05	0.000441405	+	chr20:1875153-1920543	1.77617	5e-05	0.00352391
SOGA1	140710	Hyper-up	chr20	NM_080627	diffreps_peak_20137	35413901	35414400	2.24078	1.94803e-07	1.49e-05	-	chr20:35405844-35492089	1.75721	0.00015	0.00900556
MICAL3	57553	Hyper-up	chr22	NM_015241	diffreps_peak_21018	18271481	18271680	2.24073	2.44537e-07	1.75e-05	-	chr22:18270414-18507325	1.52187	0.03165	0.367416
C1orf220	400798	Hyper-up	chr1	ENST00000367638	diffreps_peak_2613	178514009	178514060	2.24066	5.30819e-05	0.00127705	+	chr1:178482211-178518024	2.80576	0.0018	0.0591083
GCNT2	2651	Hyper-up	chr6	NM_001491	diffreps_peak_28474	10557201	10557500	2.23984	4.46221e-05	0.00110552	+	chr6:10492455-10629601	1.97838	0.00035	0.0176295
LARP4B	23185	Hyper-up	chr10	NM_015155	diffreps_peak_3654	853021	853860	2.23969	8.97724e-08	8.9e-06	-	chr10:855483-977564	1.51851	0.00895	0.173653
FAM114A1	92689	Hyper-up	chr4	NM_138389	diffreps_peak_24462	38933071	38933233	2.23886	2.06937e-06	8.72e-05	+	chr4:38869297-38947360	3.56208	0.0008	0.03242
PVR	5817	Hyper-up	chr19	NM_006505	diffreps_peak_16175	45166121	45166860	2.23743	3.18378e-06	0.000124077	+	chr19:45041044-45222031	1.54557	0.02155	0.294688
MSRB1	51734	Hyper-up	chr16	NM_016332	diffreps_peak_12186	1988701	1989144	2.23737	3.21343e-06	0.000124982	-	chr16:1988210-1993327	2.1579	5e-05	0.00352391
ZNF717	100131827	Hyper-up	chr3	NM_001128223	diffreps_peak_22661	75786941	75787140	2.23598	1.02738e-08	2.21e-06	-	chr3:75758793-75834734	1.54032	0.04215	0.43072
ERMN	57471	Hypo-down	chr2	NM_020711	diffreps_peak_18618	158181913	158182160	2.23404	6.05322e-07	3.36e-05	-	chr2:158175136-158184225	-2.71167	5e-05	0.00352391
PTAFR	5724	Hyper-up	chr1	NM_000952	diffreps_peak_440	28476561	28476940	2.23379	1.71918e-06	7.53e-05	-	chr1:28473676-28520447	2.0656	5e-05	0.00352391
H1F0	3005	Hyper-up	chr22	NM_005318	diffreps_peak_21422	38201113	38202240	2.233	1.34751e-05	0.000409187	+	chr22:38201113-38203442	1.59618	0.0007	0.0292998
UBTD1	80019	Hyper-up	chr10	NM_024954	diffreps_peak_4715	99329894	99330700	2.23259	1.21844e-06	5.7e-05	+	chr10:99258624-99330966	1.73043	0.0245	0.317902
ANKRD50	57182	Hyper-up	chr4	NM_020337	diffreps_peak_25457	125599830	125600040	2.23135	0.0159248	0.119321	-	chr4:125585206-125633887	1.84036	5e-05	0.00352391
CXorf21	80231	Hyper-up	chrX	NM_025159	diffreps_peak_36273	30577601	30578440	2.23133	2.31066e-08	3.76e-06	-	chrX:30576940-30595961	1.95357	5e-05	0.00352391
COL18A1	80781	Hyper-up	chr21	NM_030582	diffreps_peak_20933	46932161	46932560	2.23084	8.82869e-06	0.000287231	+	chr21:46825051-46964325	2.60126	0.0138	0.227209
ACPP	55	Hyper-up	chr3	NM_001134194	diffreps_peak_23242	132086701	132087146	2.23075	1.38363e-06	6.32e-05	+	chr3:132036210-132087142	1.70446	0.0002	0.0113213
PDCD1	5133	Hypo-down	chr2	NM_005018	diffreps_peak_19661	242792561	242793040	2.23048	0.000599978	0.00929696	-	chr2:242792032-242801060	-2.59201	0.0026	0.0768832
BTLA	151888	Hyper-up	chr3	NM_181780	diffreps_peak_22896	112198321	112198616	2.22858	1.22946e-06	5.75e-05	-	chr3:112182814-112218408	1.81718	0.00785	0.159242
CENPE	1062	Hypo-down	chr4	NM_001813	diffreps_peak_25204	104062921	104063065	2.22835	0.0169909	0.125234	-	chr4:104026962-104119566	-3.38417	0.012	0.20774
LAMA5	3911	Hyper-up	chr20	uc021wfw.1	diffreps_peak_20397	60890261	60890263	2.22797	0.00624379	0.0583873	-	chr20:60877148-60942368	3.9982	0.00125	0.0450278
SERPINA1	5265	Hyper-up	chr14	NM_001127700	diffreps_peak_10674	94856756	94857029	2.22791	0.000119859	0.00251629	-	chr14:94843083-94857030	1.89995	5e-05	0.00352391
ARL11	115761	Hyper-up	chr13	NM_138450	diffreps_peak_9220	50207481	50208008	2.22676	5.73562e-09	1.51e-06	+	chr13:50202434-50208008	1.99842	5e-05	0.00352391
TSHZ3	57616	Hyper-up	chr19	NM_020856	diffreps_peak_15771	31769521	31770658	2.22617	2.07457e-06	8.73e-05	-	chr19:31765850-31908700	1.76264	0.001	0.0382639
HFE	3077	Hyper-up	chr6	NM_000410	diffreps_peak_28669	26093346	26093460	2.22608	4.95434e-06	0.0001779	+	chr6:26087508-26098571	2.35173	0.00055	0.0251463
RUNX3	864	Hypo-down	chr1	NM_004350	diffreps_peak_378	25233749	25233908	2.2248	8.37148e-07	4.27e-05	-	chr1:25226001-25291612	-2.35484	5e-05	0.00352391
GNG10	2790	Hyper-up	chr9	NM_001017998	diffreps_peak_35417	114423850	114423940	2.22386	0.0366311	0.221944	+	chr9:114393631-114432526	2.13415	5e-05	0.00352391
RAB3D	9545	Hyper-up	chr19	NM_004283	diffreps_peak_15459	11435741	11436100	2.22377	3.97261e-07	2.46e-05	-	chr19:11406823-11465620	1.69441	5e-05	0.00352391
SLC46A1	113235	Hyper-up	chr17	NM_080669	diffreps_peak_13597	26732904	26733230	2.22278	2.52353e-05	0.000689354	-	chr17:26684603-26734215	2.29956	0.03085	0.362724
CST7	8530	Hypo-down	chr20	NM_003650	diffreps_peak_20001	24940321	24940520	2.22199	2.53315e-07	1.79e-05	+	chr20:24929865-24940564	-2.03788	5e-05	0.00352391
SOGA1	140710	Hyper-up	chr20	NM_080627	diffreps_peak_20143	35467619	35467800	2.22158	5.36429e-07	3.08e-05	-	chr20:35405844-35492089	1.75721	0.00015	0.00900556
PPP1R16B	26051	Hypo-down	chr20	NM_015568	diffreps_peak_20186	37535621	37535697	2.22092	1.5843e-06	7.04e-05	+	chr20:37434347-37551667	-2.02421	5e-05	0.00352391
SYNPO	11346	Hyper-up	chr5	NM_007286	diffreps_peak_27894	150027505	150027800	2.22031	0.00629863	0.0587733	+	chr5:149980641-150038782	1.68321	0.0179	0.262865
PSRC1	84722	Hyper-up	chr1	ENST00000409138	diffreps_peak_1577	109823561	109823873	2.21905	0.000275565	0.00497138	-	chr1:109822177-109825808	2.07665	0.00345	0.0936331
SUFU	51684	Hyper-up	chr10	NM_016169	diffreps_peak_4786	104390881	104391100	2.21836	1.89255e-07	1.47e-05	+	chr10:104263743-104393292	1.8687	0.0068	0.145755
CD163	9332	Hyper-up	chr12	NM_004244	diffreps_peak_7043	7635561	7635600	2.21651	3.55e-06	0.000135769	-	chr12:7499280-7656489	2.19396	5e-05	0.00352391
USP36	57602	Hypo-down	chr17	NM_025090	diffreps_peak_14323	76793381	76793640	2.21645	1.01091e-07	9.63e-06	-	chr17:76783462-76837523	-1.91919	5e-05	0.00352391
CNR2	1269	Hyper-up	chr1	NM_001841	diffreps_peak_351	24200581	24201240	2.21611	7.28023e-07	3.85e-05	-	chr1:24197015-24285549	1.60801	0.0023	0.0707091
LAT2	7462	Hyper-up	chr7	NM_014146	diffreps_peak_31384	73624161	73624360	2.21499	0.000843619	0.0121925	+	chr7:73613981-73644161	1.5894	0.00055	0.0251463
RNASEL	6041	Hyper-up	chr1	ENST00000444138	diffreps_peak_2708	182555621	182556108	2.21356	2.62272e-09	8.78e-07	-	chr1:182542768-182558391	1.68347	5e-05	0.00352391
ALPK1	80216	Hyper-up	chr4	NM_025144	diffreps_peak_25344	113351941	113352340	2.21189	6.07409e-11	7.24e-08	+	chr4:113195697-113363776	1.73098	0.0011	0.0410337
AK4	205	Hyper-up	chr1	NM_013410	diffreps_peak_1007	65691745	65692060	2.21076	0.00134626	0.0176937	+	chr1:65613231-65697828	3.0315	0.00845	0.168349
GAPT	202309	Hyper-up	chr5	NM_001304429	diffreps_peak_26636	57789445	57789665	2.21	1.38247e-07	1.19e-05	+	chr5:57787261-57792917	1.87759	0.00015	0.00900556
FRMPD3	84443	Hypo-down	chrX	NM_032428	diffreps_peak_37203	106847481	106847900	2.20986	0.00645581	0.0599053	+	chrX:106756212-106848481	-1.93716	0.014	0.228812
NHSL2	340527	Hyper-up	chrX	NM_001013627	diffreps_peak_36795	71358701	71360220	2.2095	3.82993e-07	2.4e-05	+	chrX:71130937-71363424	1.88103	5e-05	0.00352391
STAB1	23166	Hyper-up	chr3	NM_015136	diffreps_peak_22421	52536647	52536743	2.20821	0.00422251	0.0430776	+	chr3:52529353-52742182	2.07063	0.01105	0.197824
PDE4D	5144	Hypo-down	chr5	NM_001197221	diffreps_peak_26653	58335161	58335339	2.20737	0.000110587	0.00235272	-	chr5:58264864-59843484	-2.24047	5e-05	0.00352391
RNF165	494470	Hypo-down	chr18	NM_152470	diffreps_peak_14822	44038141	44038340	2.20677	0.0468533	0.265593	+	chr18:43906771-44043103	-2.2128	0.00555	0.130042
ZNF804A	91752	Hyper-up	chr2	NM_194250	diffreps_peak_18940	185800761	185800960	2.20557	0.0244966	0.164652	+	chr2:185463092-185804219	2.02459	0.00515	0.124094
SLC7A5	8140	Hypo-down	chr16	NM_003486	diffreps_peak_13087	87864681	87865180	2.20403	0.000413402	0.00690292	-	chr16:87863628-87903094	-2.74636	5e-05	0.00352391
CDKN2B	1030	Hyper-up	chr9	NM_004936	diffreps_peak_34264	22008921	22009312	2.20378	0.000680332	0.0102752	-	chr9:21802541-22121096	3.15771	0.04785	0.46522
FAM71F2	346653	Hypo-up	chr7	NM_001012454	diffreps_peak_32064	128323017	128323240	2.20319	0.00379241	0.0395838	+	chr7:128312341-128326929	2.09069	0.02455	0.317902
GBGT1	26301	Hyper-up	chr9	NM_021996	diffreps_peak_35822	136029261	136029640	2.20158	0.000466486	0.00761221	-	chr9:135973106-136039332	2.40157	0.0271	0.336739
POU2F2	5452	Hyper-up	chr19	NM_002698	diffreps_peak_16097	42593441	42594440	2.20063	3.69186e-09	1.13e-06	-	chr19:42590262-42700737	1.72753	0.00065	0.0280633
SAMD4A	23034	Hyper-up	chr14	NM_015589	diffreps_peak_10091	55218168	55218255	2.1987	0.00895545	0.0770184	+	chr14:55033814-55260033	2.15986	0.0008	0.03242
ARHGEF40	55701	Hyper-up	chr14	NM_018071	diffreps_peak_9722	21542201	21543260	2.19846	9.07359e-06	0.000293703	+	chr14:21484921-21572881	1.66832	0.0041	0.104888
SEC14L2	23541	Hypo-down	chr22	NM_012429	diffreps_peak_21268	30819801	30820120	2.19823	0.00101771	0.0141726	+	chr22:30727976-30825045	-5.48872	5e-05	0.00352391
CAMSAP2	23271	Hyper-up	chr1	NM_203459	diffreps_peak_2907	200821668	200821805	2.19781	1.03001e-06	5.02e-05	+	chr1:200708685-200829832	2.25265	5e-05	0.00352391
LINGO2	158038	Hypo-down	chr9	NM_152570	diffreps_peak_34304	27949801	27950200	2.19773	0.000878411	0.0125912	-	chr9:27948075-28670283	-3.47405	0.03215	0.370567
IMPA2	3613	Hyper-up	chr18	NM_014214	diffreps_peak_14555	11981426	11981764	2.19698	1.49975e-07	1.26e-05	+	chr18:11981023-12030876	1.832	0.00015	0.00900556
GCA	25801	Hyper-up	chr2	ENST00000446271	diffreps_peak_18684	163175441	163175640	2.19589	0.0195175	0.138945	+	chr2:163175349-163695240	2.60928	5e-05	0.00352391
TGFBR3	7049	Hypo-down	chr1	NM_003243	diffreps_peak_1381	92149101	92149414	2.19498	2.53463e-07	1.79e-05	-	chr1:92145901-92371892	-2.05324	0.00035	0.0176295
CASZ1	54897	Hypo-down	chr1	NM_017766	diffreps_peak_186	10707262	10707640	2.19405	0.00103827	0.0143723	-	chr1:10696660-10856707	-1.95734	0.01525	0.24128
S100A9	6280	Hyper-up	chr1	NM_002965	diffreps_peak_2131	153330329	153330357	2.19389	0.000101296	0.00218624	+	chr1:153330329-153333503	2.41739	5e-05	0.00352391
DISC1	27185	Hyper-up	chr1	NM_001164538	diffreps_peak_3449	232145001	232145380	2.19377	0.00594678	0.0562542	+	chr1:231664398-232177019	1.68019	0.01005	0.188435
TLDC1	57707	Hyper-up	chr16	NM_020947	diffreps_peak_13027	84513361	84513632	2.19284	0.000400063	0.00672918	-	chr16:84511680-84587639	1.74666	0.01065	0.193305
CRISPLD2	83716	Hyper-up	chr16	NM_031476	diffreps_peak_13039	84853586	84853739	2.19269	0.000908649	0.0129371	+	chr16:84853589-84954374	1.76963	5e-05	0.00352391
AMICA1		Hyper-up	chr11	NM_153206	diffreps_peak_6631	118064501	118065020	2.19095	4.86203e-07	2.85e-05	-	chr11:118064454-118095809	1.63224	0.0006	0.0265474
CLMN	79789	Hyper-up	chr14	NM_024734	diffreps_peak_10678	95662834	95663031	2.19059	1.16029e-06	5.5e-05	-	chr14:95648276-95786243	1.99445	5e-05	0.00352391
F5	2153	Hyper-up	chr1	NM_000130	diffreps_peak_2486	169500023	169500060	2.19022	4.47164e-07	2.68e-05	-	chr1:169483403-169555826	2.02326	5e-05	0.00352391
PPP2R5C	5527	Hypo-down	chr14	NM_001161725	diffreps_peak_10791	102229241	102229307	2.18793	1.59096e-06	7.07e-05	+	chr14:102228134-102394326	-1.60792	0.00025	0.0135083
HDAC9	9734	Hyper-up	chr7	ENST00000433709	diffreps_peak_30725	18329821	18330138	2.1866	2.67326e-09	8.91e-07	+	chr7:18126571-19042039	1.652	0.0116	0.202983
ANKRD50	57182	Hyper-up	chr4	NM_020337	diffreps_peak_25456	125592081	125593500	2.1858	1.33612e-06	6.14e-05	-	chr4:125585206-125633887	1.84036	5e-05	0.00352391
SYNPO	11346	Hyper-up	chr5	NM_007286	diffreps_peak_27895	150027821	150028980	2.18473	1.12642e-06	5.38e-05	+	chr5:149980641-150038782	1.68321	0.0179	0.262865
PAQR4	124222	Hyper-up	chr16	NM_152341	diffreps_peak_12209	3021515	3022040	2.1836	7.1306e-05	0.00163184	+	chr16:3013944-3030540	2.06975	0.003	0.0854521
GABARAPL1	23710	Hypo-down	chr12	ENST00000421801	diffreps_peak_7143	10365434	10365560	2.18344	0.000426344	0.00708361	+	chr12:10365056-10375727	-2.25848	5e-05	0.00352391
AUTS2	26053	Hypo-down	chr7	NM_015570	diffreps_peak_31340	70254733	70256440	2.18344	4.5396e-05	0.00112267	+	chr7:69063904-70258054	-3.25631	5e-05	0.00352391
PPP2R5C	5527	Hypo-down	chr14	NM_001161725	diffreps_peak_10790	102228134	102228257	2.18182	2.7186e-06	0.000109115	+	chr14:102228134-102394326	-1.60792	0.00025	0.0135083
CIITA	4261	Hyper-up	chr16	uc002dag.2	diffreps_peak_12309	11002121	11002500	2.17712	5.48959e-08	6.52e-06	+	chr16:10958770-11036878	1.57534	0.01535	0.242218
SYTL2	54843	Hypo-down	chr11	NM_032943	diffreps_peak_6280	85448617	85448699	2.17604	1.42431e-07	1.22e-05	-	chr11:85405266-85522184	-2.31872	5e-05	0.00352391
RNASE2	6036	Hyper-up	chr14	NM_002934	diffreps_peak_9718	21424361	21424594	2.17566	1.79752e-06	7.79e-05	+	chr14:21423610-21424595	2.16724	5e-05	0.00352391
EGR2	1959	Hyper-up	chr10	NM_000399	diffreps_peak_4272	64576021	64576126	2.17534	6.99191e-06	0.000236754	-	chr10:64571755-64679660	3.03743	5e-05	0.00352391
VCAN	1462	Hyper-up	chr5	NM_004385	diffreps_peak_27084	82817781	82818128	2.17323	0.000177431	0.00346904	+	chr5:82767283-82878122	1.86966	0.00095	0.0369051
PLAUR	5329	Hypo-down	chr19	ENST00000593939	diffreps_peak_16132	44172041	44172340	2.17311	1.85544e-06	7.99e-05	-	chr19:44150246-44174699	-1.89743	5e-05	0.00352391
TMEM88	92162	Hypo-down	chr17	NM_203411	diffreps_peak_13365	7758481	7758602	2.17225	0.000205317	0.00390979	+	chr17:7758382-7759417	-2.24775	0.04325	0.437734
SPINT1	6692	Hyper-up	chr15	NM_003710	diffreps_peak_11263	41149601	41149853	2.17054	1.31902e-08	2.59e-06	+	chr15:41128005-41150405	1.57817	0.0396	0.414382
CREM	1390	Hypo-down	chr10	NM_001881	diffreps_peak_4020	35415941	35416121	2.17038	1.40999e-06	6.42e-05	+	chr10:35386933-35501886	-3.43248	5e-05	0.00352391
SAPCD2	89958	Hyper-up	chr9	NM_178448	diffreps_peak_35920	139957441	139958040	2.16863	0.000115501	0.00243974	-	chr9:139952114-139965040	1.95374	0.0076	0.155944
COL18A1	80781	Hyper-up	chr21	NM_030582	diffreps_peak_20930	46929269	46929515	2.1666	0.000206122	0.00392237	+	chr21:46825051-46964325	2.60126	0.0138	0.227209
CD93	22918	Hyper-up	chr20	NM_012072	diffreps_peak_19992	23061621	23061860	2.16622	5.27288e-06	0.000187386	-	chr20:23059985-23066977	1.87959	5e-05	0.00352391
NR4A1	3164	Hypo-down	chr12	ENST00000550082	diffreps_peak_7787	52435588	52435713	2.16573	0.0026383	0.0299849	+	chr12:52416615-52453291	-2.25073	0.0003	0.0156412
LAIR1	3903	Hyper-up	chr19	NM_001289025	diffreps_peak_16456	54866241	54867023	2.16433	2.0447e-06	8.65e-05	-	chr19:54865361-54882165	1.61302	0.0001	0.0065797
KIF19	124602	Hypo-down	chr17	NM_153209	diffreps_peak_14214	72350481	72350698	2.16371	0.00882966	0.0761571	+	chr17:72322348-72351959	-3.8019	5e-05	0.00352391
BATF	10538	Hyper-up	chr14	NM_006399	diffreps_peak_10477	75991426	75991531	2.16332	7.42118e-07	3.91e-05	+	chr14:75988767-76013358	1.57764	0.01505	0.239818
SH2D3C	10044	Hyper-up	chr9	NM_005489	diffreps_peak_35738	130511741	130511944	2.16022	1.14929e-07	1.05e-05	-	chr9:130500595-130541020	1.77989	5e-05	0.00352391
ATG2A	23130	Hypo-down	chr11	NM_015104	diffreps_peak_5958	64684461	64684722	2.15931	0.000881813	0.0126288	-	chr11:64662006-64684722	-2.33218	0.0002	0.0113213
PAX5	5079	Hyper-up	chr9	NM_016734	diffreps_peak_34464	36836981	36837280	2.15919	0.000275215	0.00496594	-	chr9:36833271-37034103	2.14179	5e-05	0.00352391
PLEKHF1	79156	Hypo-down	chr19	ENST00000592810	diffreps_peak_15754	30156365	30156660	2.15848	3.16579e-05	0.000832985	+	chr19:30155962-30166364	-1.89522	0.0006	0.0265474
MAFF	23764	Hypo-down	chr22	NM_012323	diffreps_peak_21435	38611781	38612000	2.15696	0.00427077	0.0434544	+	chr22:38507501-38612518	-1.89745	0.013	0.218476
HVCN1	84329	Hyper-up	chr12	NM_032369	diffreps_peak_8509	111099041	111099253	2.15626	1.39095e-07	1.2e-05	-	chr12:111051831-111142755	2.05634	5e-05	0.00352391
LRIF1	55791	Hyper-up	chr1	NM_018372	diffreps_peak_1617	111493909	111494200	2.15577	1.11817e-06	5.35e-05	-	chr1:111486088-111507271	1.58611	0.03815	0.407825
AGAP1	116987	Hypo-down	chr2	NM_014914	diffreps_peak_19519	236877105	236877267	2.15566	2.41508e-07	1.73e-05	+	chr2:236402732-237040444	-1.53846	0.0401	0.417654
DACT1	51339	Hyper-up	chr14	NM_016651	diffreps_peak_10148	59104756	59105200	2.15516	0.00448692	0.0451838	+	chr14:59100684-59115039	2.60799	0.0002	0.0113213
MICAL3	57553	Hyper-up	chr22	NM_015241	diffreps_peak_21020	18301401	18301895	2.15362	3.11112e-08	4.57e-06	-	chr22:18270414-18507325	1.52187	0.03165	0.367416
HIC1	3090	Hypo-down	chr17	NM_006497	diffreps_peak_13217	1959964	1960760	2.15233	9.58632e-07	4.74e-05	+	chr17:1957447-1962981	-3.36785	0.0001	0.0065797
PPP1R26	9858	Hyper-up	chr9	NM_014811	diffreps_peak_35869	138379781	138380200	2.15208	2.14612e-08	3.57e-06	+	chr9:138354572-138380739	1.75463	0.01235	0.21154
ZC3H12A	80149	Hypo-down	chr1	NM_025079	diffreps_peak_543	37941059	37941420	2.15028	1.85226e-06	7.98e-05	+	chr1:37940152-37949980	-2.37007	5e-05	0.00352391
SLC35C1	55343	Hyper-up	chr11	NM_018389	diffreps_peak_5725	45827861	45827887	2.14742	5.95508e-05	0.00140608	+	chr11:45825622-45834566	1.60469	0.0038	0.100382
SOGA1	140710	Hyper-up	chr20	NM_080627	diffreps_peak_20136	35412301	35413720	2.14706	5.82073e-07	3.26e-05	-	chr20:35405844-35492089	1.75721	0.00015	0.00900556
OPRL1	4987	Hyper-up	chr20	NM_000913	diffreps_peak_20444	62729154	62729260	2.14649	0.000325984	0.00570151	+	chr20:62711525-62731996	1.80872	0.00565	0.13111
NUDT16	131870	Hyper-up	chr3	NM_152395	diffreps_peak_23229	131106641	131107320	2.14638	1.03681e-06	5.04e-05	+	chr3:131100514-131107674	1.61444	0.0045	0.112066
RPGRIP1	57096	Hyper-up	chr14	NM_020366	diffreps_peak_9730	21796661	21796786	2.14599	0.016617	0.123143	+	chr14:21756097-21819460	2.59391	0.00105	0.0394991
CREM	1390	Hypo-down	chr10	NM_181571	diffreps_peak_4022	35426721	35426807	2.1459	0.026428	0.174346	+	chr10:35386933-35501886	-3.43248	5e-05	0.00352391
NRG1	3084	Hyper-up	chr8	NM_013959	diffreps_peak_32895	32504281	32504700	2.14543	0.000137262	0.00281663	+	chr8:31496901-32622548	3.29672	5e-05	0.00352391
FCGR2A	2212	Hyper-up	chr1	NM_021642	diffreps_peak_2358	161488181	161488420	2.1435	1.40014e-05	0.000422152	+	chr1:161475219-161648444	1.68974	0.00605	0.134847
CLEC4D	338339	Hyper-up	chr12	NM_080387	diffreps_peak_7105	8673719	8674020	2.14295	5.06496e-06	0.000181168	+	chr12:8662070-8674962	1.5517	0.0012	0.0438467
CLMN	79789	Hyper-up	chr14	NM_024734	diffreps_peak_10680	95669174	95669840	2.14182	1.85243e-06	7.98e-05	-	chr14:95648276-95786243	1.99445	5e-05	0.00352391
PPIF	10105	Hypo-down	chr10	NM_005729	diffreps_peak_4455	81113601	81113860	2.1394	8.51656e-06	0.000278822	+	chr10:81107224-81115093	-2.00697	5e-05	0.00352391
POU2F2	5452	Hyper-up	chr19	NM_002698	diffreps_peak_16096	42592441	42593200	2.13934	8.26067e-09	1.93e-06	-	chr19:42590262-42700737	1.72753	0.00065	0.0280633
NLRP2	55655	Hypo-down	chr19	NM_017852	diffreps_peak_16510	55493529	55493840	2.13921	3.45219e-05	0.000894731	+	chr19:55434876-55512510	-2.0998	0.015	0.239664
NLRP2	55655	Hypo-down	chr19	NM_017852	diffreps_peak_16511	55494281	55494700	2.13899	0.000708412	0.010617	+	chr19:55434876-55512510	-2.0998	0.015	0.239664
FCRL5	83416	Hyper-up	chr1	NM_031281	diffreps_peak_2233	157484281	157485120	2.13893	0.00638634	0.0593833	-	chr1:157483166-157522310	1.81325	0.0006	0.0265474
CARD6	84674	Hyper-up	chr5	NM_032587	diffreps_peak_26490	40853361	40853680	2.13875	2.25712e-05	0.000628176	+	chr5:40841285-40860275	1.57858	0.0123	0.211089
SH2D3C	10044	Hyper-up	chr9	NM_005489	diffreps_peak_35733	130502541	130502648	2.13808	2.4616e-08	3.92e-06	-	chr9:130500595-130541020	1.77989	5e-05	0.00352391
LILRB1	10859	Hyper-up	chr19	NM_001278398	diffreps_peak_16476	55148182	55148981	2.13806	3.54891e-05	0.000915851	+	chr19:55084386-55150343	1.78518	0.002	0.0640251
NEK6	10783	Hyper-up	chr9	NM_014397	diffreps_peak_35657	127114481	127114719	2.13733	6.44747e-07	3.52e-05	+	chr9:127019884-127115586	1.87915	5e-05	0.00352391
SPINT1	6692	Hyper-up	chr15	NM_003710	diffreps_peak_11262	41148967	41149400	2.13733	1.14499e-07	1.05e-05	+	chr15:41128005-41150405	1.57817	0.0396	0.414382
ANKRD50	57182	Hyper-up	chr4	NM_020337	diffreps_peak_25455	125591601	125592000	2.13411	2.41769e-08	3.88e-06	-	chr4:125585206-125633887	1.84036	5e-05	0.00352391
PCDH9	5101	Hyper-up	chr13	NM_020403	diffreps_peak_9329	67804061	67804468	2.13386	7.39787e-07	3.9e-05	-	chr13:66876965-67804468	2.06282	0.00015	0.00900556
ZNF514	84874	Hyper-up	chr2	NM_032788	diffreps_peak_17891	95815301	95815960	2.13336	7.18533e-07	3.82e-05	-	chr2:95752951-95831158	2.03475	0.00175	0.0581085
MEGF9	1955	Hyper-up	chr9	NM_001080497	diffreps_peak_35551	123370018	123370120	2.13286	2.65413e-06	0.00010702	-	chr9:123363090-123476748	1.52633	0.00015	0.00900556
KCNK6	9424	Hyper-up	chr19	NM_004823	diffreps_peak_15960	38817819	38818220	2.13282	5.15501e-06	0.000183952	+	chr19:38810483-38819660	1.76182	0.00185	0.0604164
WWC3	55841	Hyper-up	chrX	NM_015691	diffreps_peak_36069	9983794	9983898	2.13279	6.98253e-05	0.00160319	+	chrX:9983601-10112518	1.55376	0.0041	0.104888
ARHGEF11	9826	Hyper-up	chr1	NM_014784	diffreps_peak_2222	156918110	156918220	2.13195	1.23233e-06	5.75e-05	-	chr1:156904631-157015162	1.65668	0.0044	0.110502
ITPRIPL2	162073	Hyper-up	chr16	NM_001034841	diffreps_peak_12418	19125253	19127580	2.13082	4.56396e-07	2.72e-05	+	chr16:19125253-19279652	1.64006	5e-05	0.00352391
MRVI1	10335	Hyper-up	chr11	NM_130385	diffreps_peak_5397	10602001	10602136	2.13031	6.93586e-07	3.71e-05	-	chr11:10562782-10715535	1.95921	0.00025	0.0135083
DTHD1	401124	Hypo-down	chr4	NM_001136536	diffreps_peak_24418	36317863	36318108	2.12955	1.68932e-07	1.37e-05	+	chr4:36283243-36394032	-1.60579	0.0003	0.0156412
SH2D3C	10044	Hyper-up	chr9	NM_005489	diffreps_peak_35734	130504066	130504238	2.12903	5.8773e-08	6.8e-06	-	chr9:130500595-130541020	1.77989	5e-05	0.00352391
NDUFAF1	51103	Hyper-up	chr15	NM_016013	diffreps_peak_11274	41688684	41689120	2.12792	1.14198e-07	1.05e-05	-	chr15:41679550-41694717	1.7411	0.0179	0.262865
SMAD7	4092	Hypo-down	chr18	NM_005904	diffreps_peak_14868	46447681	46448280	2.12643	1.60979e-06	7.14e-05	-	chr18:46446222-46477081	-2.86664	5e-05	0.00352391
ARHGEF40	55701	Hyper-up	chr14	NM_018071	diffreps_peak_9721	21541361	21541401	2.12621	0.000332865	0.00579744	+	chr14:21484921-21572881	1.66832	0.0041	0.104888
CBFA2T3	863	Hyper-up	chr16	NM_005187	diffreps_peak_13140	88942601	88943683	2.12598	2.56506e-07	1.8e-05	-	chr16:88941265-89043612	1.60322	0.0011	0.0410337
PAX5	5079	Hyper-up	chr9	NM_016734	diffreps_peak_34465	36837621	36837820	2.12481	1.60521e-06	7.12e-05	-	chr9:36833271-37034103	2.14179	5e-05	0.00352391
KCNK6	9424	Hyper-up	chr19	NM_004823	diffreps_peak_15962	38819261	38819649	2.12429	4.76737e-08	5.97e-06	+	chr19:38810483-38819660	1.76182	0.00185	0.0604164
MARCO	8685	Hyper-up	chr2	NM_006770	diffreps_peak_18234	119739731	119739830	2.12353	0.000513918	0.00822573	+	chr2:119699741-119752236	2.06154	0.00105	0.0394991
TMOD2	29767	Hyper-up	chr15	NM_014548	diffreps_peak_11470	52043757	52043900	2.12261	0.0298247	0.190728	+	chr15:52015207-52108565	1.98854	5e-05	0.00352391
RAB15	376267	Hypo-down	chr14	NM_198686	diffreps_peak_10277	65438670	65438840	2.12168	0.014731	0.112487	-	chr14:65381078-65569413	-4.0194	0.0481	0.46675
TRIM7	81786	Hyper-up	chr5	NM_033342	diffreps_peak_28221	180630381	180630640	2.11736	0.000274975	0.00496271	-	chr5:180618923-180632293	2.48618	0.0185	0.267609
ATG2A	23130	Hypo-down	chr11	NM_015104	diffreps_peak_5956	64678278	64678400	2.11671	0.00012653	0.00263163	-	chr11:64662006-64684722	-2.33218	0.0002	0.0113213
SYTL3	94120	Hypo-down	chr6	NM_001009991	diffreps_peak_30333	159178321	159178413	2.11598	1.57852e-06	7.02e-05	+	chr6:159071045-159185908	-1.86718	0.0005	0.0234003
TNFRSF10D	8793	Hyper-up	chr8	NM_003840	diffreps_peak_32769	22995700	22995773	2.11508	0.00226863	0.0266498	-	chr8:22993100-23021543	1.90391	0.0001	0.0065797
GLCE	26035	Hyper-up	chr15	NM_015554	diffreps_peak_11702	69548321	69548580	2.114	9.52624e-08	9.23e-06	+	chr15:69452922-69564556	1.6585	0.0127	0.215465
LDLRAD3	143458	Hyper-up	chr11	NM_174902	diffreps_peak_5680	36248861	36248980	2.11364	0.00657202	0.0607551	+	chr11:35965530-36253686	1.68812	0.01205	0.208
TCEANC2	127428	Hyper-up	chr1	ENST00000234827	diffreps_peak_864	54534428	54534540	2.11334	2.24248e-05	0.000624786	+	chr1:54519259-54578192	1.64174	0.012	0.20774
ABCB4	5244	Hyper-up	chr7	NM_000443	diffreps_peak_31527	87101936	87101991	2.11323	0.000298538	0.0053033	-	chr7:87031012-87109751	2.05366	0.0284	0.347087
SGK223	157285	Hyper-up	chr8	ENST00000330777	diffreps_peak_32619	8175561	8176818	2.11321	7.02923e-06	0.000237741	-	chr8:8175257-8244008	1.63843	0.00095	0.0369051
SLC25A37	51312	Hyper-up	chr8	NM_016612	diffreps_peak_32792	23386362	23386725	2.113	3.8876e-06	0.000146241	+	chr8:23386317-23432976	2.08586	5e-05	0.00352391
NHSL2	340527	Hyper-up	chrX	NM_001013627	diffreps_peak_36792	71351928	71352084	2.11276	3.33938e-06	0.00012898	+	chrX:71130937-71363424	1.88103	5e-05	0.00352391
PAX5	5079	Hyper-up	chr9	NM_016734	diffreps_peak_34467	36840021	36840633	2.11186	1.42098e-05	0.00042717	-	chr9:36833271-37034103	2.14179	5e-05	0.00352391
VCAN	1462	Hyper-up	chr5	NM_004385	diffreps_peak_27087	82837141	82837340	2.1117	0.000536849	0.0085033	+	chr5:82767283-82878122	1.86966	0.00095	0.0369051
WWC3	55841	Hyper-up	chrX	NM_015691	diffreps_peak_36080	10096661	10096748	2.11162	0.000101171	0.00218436	+	chrX:9983601-10112518	1.55376	0.0041	0.104888
DEF8	54849	Hyper-up	chr16	NM_207514	diffreps_peak_13175	90032268	90032900	2.11148	1.44103e-09	5.72e-07	+	chr16:90014332-90034468	1.54484	0.01505	0.239818
SIRPA	140885	Hyper-up	chr20	NM_080792	diffreps_peak_19775	1905409	1905523	2.11132	2.06672e-06	8.71e-05	+	chr20:1875153-1920543	1.77617	5e-05	0.00352391
TSHZ3	57616	Hyper-up	chr19	NM_020856	diffreps_peak_15770	31768161	31768840	2.11086	2.34973e-06	9.68e-05	-	chr19:31765850-31908700	1.76264	0.001	0.0382639
ZSWIM5	57643	Hyper-down	chr1	NM_020883	diffreps_peak_719	45553861	45553909	2.10968	0.037296	0.224983	-	chr1:45482070-45771881	-1.72073	0.0441	0.440778
VASH1	22846	Hyper-up	chr14	NM_014909	diffreps_peak_10507	77242281	77242616	2.10928	0.00107167	0.0147384	+	chr14:77228531-77253067	1.83781	0.00065	0.0280633
FES	2242	Hyper-up	chr15	ENST00000443697	diffreps_peak_12011	91428041	91428133	2.10867	3.93786e-08	5.3e-06	+	chr15:91426924-91439006	1.7109	0.0021	0.0662745
CCDC154	645811	Hyper-up	chr16	NM_001143980	diffreps_peak_12170	1487817	1487955	2.10673	0.000913449	0.0129941	-	chr16:1484383-1494557	2.83589	0.03175	0.36796
ZNF491	126069	Hyper-up	chr19	NM_152356	diffreps_peak_15473	11917921	11918240	2.10596	0.0260983	0.172677	+	chr19:11906898-11920437	3.11176	0.0034	0.0928413
MAFF	23764	Hypo-down	chr22	NM_012323	diffreps_peak_21434	38610426	38610540	2.10111	0.000258563	0.0047165	+	chr22:38507501-38612518	-1.89745	0.013	0.218476
TRIB1	10221	Hyper-up	chr8	NM_025195	diffreps_peak_33738	126442562	126443504	2.09957	0.00323419	0.0351633	+	chr8:126442562-126450647	1.73229	0.00075	0.0308139
ZNF213	7760	Hyper-up	chr16	NM_004220	diffreps_peak_12221	3185056	3185240	2.09877	0.0233512	0.159008	+	chr16:3160460-3192806	1.51379	0.04855	0.467667
SYTL2	54843	Hypo-down	chr11	NM_032943	diffreps_peak_6283	85459314	85459320	2.09771	1.49327e-07	1.26e-05	-	chr11:85405266-85522184	-2.31872	5e-05	0.00352391
VASH1	22846	Hyper-up	chr14	NM_014909	diffreps_peak_10506	77229301	77229473	2.09761	0.000855744	0.0123349	+	chr14:77228531-77253067	1.83781	0.00065	0.0280633
TNS3	64759	Hyper-up	chr7	NM_022748	diffreps_peak_31150	47621648	47621742	2.09584	8.82453e-08	8.8e-06	-	chr7:47314751-47622156	1.71466	0.00165	0.0553029
FRMPD3	84443	Hypo-down	chrX	NM_032428	diffreps_peak_37201	106844121	106844380	2.09574	0.00463278	0.0463316	+	chrX:106756212-106848481	-1.93716	0.014	0.228812
CIITA	4261	Hyper-up	chr16	ENST00000576601	diffreps_peak_12307	10972825	10972899	2.09515	6.42194e-10	3.21e-07	+	chr16:10958770-11036878	1.57534	0.01535	0.242218
ARHGEF40	55701	Hyper-up	chr14	NM_018071	diffreps_peak_9719	21538418	21538558	2.09499	0.000643039	0.00982542	+	chr14:21484921-21572881	1.66832	0.0041	0.104888
MMP25	64386	Hyper-up	chr16	NM_022468	diffreps_peak_12215	3097415	3097440	2.09402	0.00260851	0.0297185	+	chr16:3096681-3110727	3.06176	5e-05	0.00352391
PARM1	25849	Hyper-up	chr4	NM_015393	diffreps_peak_24786	75937961	75938360	2.09207	0.000479429	0.00777849	+	chr4:75858304-75975325	1.60203	0.02365	0.310761
ADSSL1	122622	Hyper-up	chr14	NM_152328	diffreps_peak_10845	105190541	105190799	2.09148	0.046753	0.265172	+	chr14:105190522-105213662	2.16971	0.02015	0.282687
TCTN1	79600	Hyper-up	chr12	ENST00000550703	diffreps_peak_8505	111067281	111067600	2.09004	0.000518367	0.00827109	+	chr12:111051831-111142755	2.18657	0.01055	0.192941
HCK	3055	Hyper-up	chr20	NM_002110	diffreps_peak_20055	30689241	30689657	2.08976	1.242e-05	0.000382897	+	chr20:30639990-30689659	1.79207	5e-05	0.00352391
NHSL2	340527	Hyper-up	chrX	NM_001013627	diffreps_peak_36794	71358321	71358660	2.08961	7.86528e-05	0.00177149	+	chrX:71130937-71363424	1.88103	5e-05	0.00352391
TBC1D9	23158	Hyper-up	chr4	NM_015130	diffreps_peak_25587	141543321	141544071	2.08929	1.98876e-06	8.45e-05	-	chr4:141541918-141677274	1.55315	0.00085	0.0339068
PER1	5187	Hypo-down	chr17	NM_002616	diffreps_peak_13376	8049689	8049820	2.08923	0.00462194	0.0462601	-	chr17:8043787-8066864	-2.03421	0.0057	0.13111
IMPA2	3613	Hyper-up	chr18	NM_014214	diffreps_peak_14557	11999052	11999186	2.08876	1.57499e-05	0.000465591	+	chr18:11981023-12030876	1.832	0.00015	0.00900556
CLEC10A	10462	Hyper-up	chr17	ENST00000576617	diffreps_peak_13323	6978181	6978580	2.08844	0.000708522	0.0106183	-	chr17:6977855-6983626	1.70942	0.0009	0.0354258
DUSP10	11221	Hypo-down	chr1	NM_007207	diffreps_peak_3211	221912275	221912940	2.08782	9.45718e-06	0.000303895	-	chr1:221874765-221915518	-2.69624	5e-05	0.00352391
MYBL1	4603	Hypo-down	chr8	NM_001080416	diffreps_peak_33142	67474409	67474440	2.08682	0.028556	0.184543	-	chr8:67474409-67526482	-1.72855	5e-05	0.00352391
METRNL	284207	Hypo-down	chr17	NM_001004431	diffreps_peak_14420	81052000	81052640	2.08626	0.000321012	0.00562881	+	chr17:81037566-81052864	-2.55298	5e-05	0.00352391
ERMN	57471	Hypo-down	chr2	NM_020711	diffreps_peak_18616	158177581	158178303	2.08515	2.61284e-06	0.000105683	-	chr2:158175136-158184225	-2.71167	5e-05	0.00352391
PODN	127435	Hypo-down	chr1	NM_153703	diffreps_peak_846	53550184	53550760	2.08345	0.000895359	0.0127859	+	chr1:53527853-53551174	-1.97406	0.0249	0.320803
SH2D3C	10044	Hyper-up	chr9	NM_005489	diffreps_peak_35735	130506842	130507378	2.08307	1.05343e-08	2.25e-06	-	chr9:130500595-130541020	1.77989	5e-05	0.00352391
VWA5A	4013	Hyper-up	chr11	NM_014622	diffreps_peak_6737	124005626	124005640	2.08303	0.0175538	0.12846	+	chr11:123986068-124018428	1.60917	0.0178	0.262091
VCAN	1462	Hyper-up	chr5	NM_004385	diffreps_peak_27086	82836301	82836620	2.08272	0.000547682	0.00864764	+	chr5:82767283-82878122	1.86966	0.00095	0.0369051
ELANE	1991	Hypo-down	chr19	NM_001972	diffreps_peak_15167	856021	856246	2.08177	0.0480471	0.270143	+	chr19:851013-856242	-1.76674	0.0448	0.445526
CARD6	84674	Hyper-up	chr5	NM_032587	diffreps_peak_26489	40843253	40843780	2.08133	3.40282e-06	0.000131057	+	chr5:40841285-40860275	1.57858	0.0123	0.211089
SOGA1	140710	Hyper-up	chr20	NM_080627	diffreps_peak_20140	35443901	35444320	2.08095	0.00274495	0.0309267	-	chr20:35405844-35492089	1.75721	0.00015	0.00900556
SLC24A4	123041	Hyper-up	chr14	NM_153646	diffreps_peak_10646	92960561	92961000	2.08076	2.91023e-06	0.000115305	+	chr14:92788924-92962596	1.5091	0.0005	0.0234003
JUN	3725	Hypo-down	chr1	NM_002228	diffreps_peak_910	59247221	59249500	2.08054	0.0108699	0.089489	-	chr1:59246464-59249785	-2.24638	5e-05	0.00352391
MAFF	23764	Hypo-down	chr22	NM_012323	diffreps_peak_21432	38597938	38598100	2.07767	0.0136687	0.106351	+	chr22:38507501-38612518	-1.89745	0.013	0.218476
PSRC1	84722	Hyper-up	chr1	NM_032636	diffreps_peak_1576	109822381	109822778	2.07726	1.16766e-08	2.4e-06	-	chr1:109822177-109825808	2.07665	0.00345	0.0936331
IL2RB	3560	Hypo-down	chr22	NM_000878	diffreps_peak_21385	37540141	37540245	2.07526	1.79733e-07	1.43e-05	-	chr22:37521877-37595425	-1.61738	0.0023	0.0707091
CBR1	873	Hyper-up	chr21	NM_001757	diffreps_peak_20715	37444821	37445300	2.07523	6.96629e-11	7.6e-08	+	chr21:37402367-37498938	1.58895	0.04925	0.470342
NCF1	653361	Hyper-up	chr7	ENST00000289473	diffreps_peak_31398	74193602	74193768	2.07493	2.08795e-05	0.000589439	+	chr7:74071993-74306731	1.52499	0.0417	0.427821
PAX5	5079	Hyper-up	chr9	NM_016734	diffreps_peak_34486	37006469	37006534	2.07428	5.37856e-05	0.00129121	-	chr9:36833271-37034103	2.14179	5e-05	0.00352391
MEFV	4210	Hyper-up	chr16	NM_000243	diffreps_peak_12228	3292601	3293694	2.0735	1.53596e-05	0.000455862	-	chr16:3292027-3306627	1.5259	0.0001	0.0065797
FAM129C	199786	Hyper-up	chr19	ENST00000601861	diffreps_peak_15619	17638046	17638180	2.0734	0.012926	0.101949	+	chr19:17634109-17664648	1.61843	0.006	0.134405
CYFIP1	23191	Hyper-up	chr15	NM_014608	diffreps_peak_11039	22946960	22947086	2.07326	4.59803e-07	2.74e-05	+	chr15:22892004-23034427	1.78861	0.0002	0.0113213
PLXNC1	10154	Hyper-up	chr12	NM_005761	diffreps_peak_8304	94542601	94543809	2.07272	1.04187e-05	0.000329793	+	chr12:94542498-94853764	1.68399	0.00025	0.0135083
ERLIN2	11160	Hyper-up	chr8	NM_007175	diffreps_peak_32955	37611432	37611760	2.07157	1.70507e-07	1.37e-05	+	chr8:37592278-37616619	1.74609	0.0031	0.0871863
TMCC3	57458	Hypo-down	chr12	NM_001301036	diffreps_peak_8319	94965141	94965513	2.07022	7.90626e-07	4.09e-05	-	chr12:94960899-95044338	-2.48678	5e-05	0.00352391
NDUFAF1	51103	Hyper-up	chr15	NM_016013	diffreps_peak_11275	41694541	41694658	2.06955	0.00130748	0.0173026	-	chr15:41679550-41694717	1.7411	0.0179	0.262865
TLR7	51284	Hyper-up	chrX	NM_016562	diffreps_peak_36119	12904801	12905000	2.06953	0.0002382	0.00440908	+	chrX:12885201-12908499	1.66195	0.00055	0.0251463
MEGF9	1955	Hyper-up	chr9	NM_001080497	diffreps_peak_35550	123367201	123367919	2.06942	2.64996e-05	0.000718416	-	chr9:123363090-123476748	1.52633	0.00015	0.00900556
C2orf81	388963	Hyper-up	chr2	NM_001145054	diffreps_peak_17691	74641381	74641700	2.06868	0.004629	0.0463017	-	chr2:74641303-74648718	2.34743	0.034	0.384182
ZNF573	126231	Hyper-up	chr19	NM_152360	diffreps_peak_15934	38229861	38230440	2.06851	9.08696e-09	2.06e-06	-	chr19:38226733-38307940	1.64415	0.01265	0.215026
VENTX	27287	Hyper-up	chr10	NM_014468	diffreps_peak_5098	135054721	135055220	2.06718	2.9091e-06	0.000115288	+	chr10:135050907-135055433	1.52622	0.00875	0.171452
SYTL2	54843	Hypo-down	chr11	NM_032943	diffreps_peak_6289	85521996	85522202	2.06717	6.03404e-07	3.35e-05	-	chr11:85405266-85522184	-2.31872	5e-05	0.00352391
LAIR1	3903	Hyper-up	chr19	NM_001289025	diffreps_peak_16455	54865232	54865300	2.06686	4.80755e-06	0.000173717	-	chr19:54865361-54882165	1.61302	0.0001	0.0065797
CACNA2D2	9254	Hypo-down	chr3	NM_006030	diffreps_peak_22362	50431539	50431599	2.06585	0.00443069	0.0447293	-	chr3:50384760-50541675	-2.25085	0.00505	0.122847
JRKL	8690	Hyper-up	chr11	NM_003772	diffreps_peak_6445	96124661	96125440	2.06478	4.08754e-09	1.19e-06	+	chr11:96123152-96240738	1.56412	0.00715	0.149638
FOSL2	2355	Hypo-down	chr2	NM_005253	diffreps_peak_16998	28615778	28616020	2.06439	0.00146915	0.0189821	+	chr2:28607275-28640179	-2.08389	5e-05	0.00352391
LILRA1	11024	Hyper-up	chr19	NM_006863	diffreps_peak_16469	55113461	55113800	2.06437	1.88929e-06	8.11e-05	+	chr19:55084386-55150343	1.7883	0.00125	0.0450278
MATK	4145	Hypo-down	chr19	NM_139354	diffreps_peak_15261	3786201	3786415	2.06311	0.00632135	0.0589213	-	chr19:3777970-3802127	-1.6392	0.00035	0.0176295
FOSL2	2355	Hypo-down	chr2	NM_005253	diffreps_peak_17000	28631625	28631733	2.06285	0.00520976	0.050807	+	chr2:28607275-28640179	-2.08389	5e-05	0.00352391
LMO2	4005	Hyper-up	chr11	NM_005574	diffreps_peak_5625	33880981	33881121	2.06273	8.03565e-07	4.15e-05	-	chr11:33880121-33913836	1.90051	5e-05	0.00352391
TMEM150B	284417	Hyper-up	chr19	NM_001282011	diffreps_peak_16529	55832421	55832461	2.06117	0.0224475	0.1543	-	chr19:55824168-55845416	2.35042	0.0027	0.0789241
WWC3	55841	Hyper-up	chrX	NM_015691	diffreps_peak_36079	10090658	10090779	2.05992	8.10609e-08	8.33e-06	+	chrX:9983601-10112518	1.55376	0.0041	0.104888
CDKN1A	1026	Hypo-down	chr6	NM_000389	diffreps_peak_28912	36646455	36646575	2.05847	0.00353357	0.0375991	+	chr6:36644304-36655116	-1.87805	5e-05	0.00352391
GSTM4	2948	Hyper-up	chr1	NM_000850	diffreps_peak_1593	110203901	110204180	2.05783	0.0250529	0.167492	+	chr1:110198702-110208118	1.80646	0.0318	0.36796
ADAP2	55803	Hyper-up	chr17	NM_018404	diffreps_peak_13649	29284861	29285940	2.0568	1.40766e-07	1.21e-05	+	chr17:29224353-29286340	1.65981	0.00145	0.0503995
FCN1	2219	Hyper-up	chr9	NM_002003	diffreps_peak_35859	137801430	137801860	2.05652	2.08091e-05	0.000587696	-	chr9:137801430-137809809	1.57809	5e-05	0.00352391
AGAP1	116987	Hypo-down	chr2	NM_014914	diffreps_peak_19531	237033001	237033220	2.05592	0.0247255	0.165807	+	chr2:236402732-237040444	-1.53846	0.0401	0.417654
SH3RF1	57630	Hyper-up	chr4	NM_020870	diffreps_peak_26046	170077581	170077800	2.0557	0.0100656	0.084298	-	chr4:170015406-170192256	2.1452	0.0027	0.0789241
C19orf35	374872	Hyper-up	chr19	NM_198532	diffreps_peak_15204	2282085	2282180	2.05462	2.19112e-05	0.000613204	-	chr19:2274630-2282181	2.73475	0.0004	0.0197028
FPR1	2357	Hyper-up	chr19	NM_002029	diffreps_peak_16366	52249541	52249740	2.05439	0.000310122	0.00547158	-	chr19:52248424-52329442	1.6502	0.0003	0.0156412
PLXNC1	10154	Hyper-up	chr12	NM_005761	diffreps_peak_8305	94562928	94562940	2.05435	3.01847e-06	0.000118795	+	chr12:94542498-94853764	1.68399	0.00025	0.0135083
CHST10	9486	Hypo-down	chr2	NM_004854	diffreps_peak_18016	101009061	101009280	2.05419	3.06709e-05	0.000811422	-	chr2:101008326-101034118	-1.78226	0.00685	0.145755
SGSM1	129049	Hypo-down	chr22	NM_133454	diffreps_peak_21171	25294001	25294526	2.05387	0.000321364	0.00563401	+	chr22:25202235-25323545	-2.16388	0.00295	0.0845682
NDC80	10403	Hypo-down	chr18	NM_006101	diffreps_peak_14443	2595414	2595620	2.05333	0.000215344	0.00406158	+	chr18:2571509-2616634	-1.64603	0.03415	0.384182
RUNX3	864	Hypo-down	chr1	NM_004350	diffreps_peak_381	25256077	25256770	2.05161	1.7144e-06	7.51e-05	-	chr1:25226001-25291612	-2.35484	5e-05	0.00352391
FAM46C	54855	Hypo-down	chr1	NM_017709	diffreps_peak_1757	118166701	118166900	2.04758	8.31946e-07	4.25e-05	+	chr1:118148555-118170994	-2.22995	5e-05	0.00352391
TIAM1	7074	Hyper-up	chr21	NM_003253	diffreps_peak_20620	32638325	32639299	2.04704	8.06343e-06	0.000266199	-	chr21:32490733-32932800	1.60914	0.00275	0.080123
ZNF681	148213	Hyper-up	chr19	NM_138286	diffreps_peak_15710	23927201	23928125	2.04609	1.26656e-07	1.12e-05	-	chr19:23921996-23941693	2.07962	0.00695	0.14718
CYFIP1	23191	Hyper-up	chr15	ENST00000561274	diffreps_peak_11038	22925749	22925899	2.04424	2.0582e-06	8.69e-05	+	chr15:22892004-23034427	1.78861	0.0002	0.0113213
SNX33	257364	Hyper-up	chr15	NM_153271	diffreps_peak_11804	75941921	75942900	2.04421	2.00384e-05	0.000569765	+	chr15:75928479-75954642	1.72477	0.0383	0.407961
IL17RA	23765	Hyper-up	chr22	NM_014339	diffreps_peak_21006	17589196	17590760	2.04385	1.55516e-05	0.00046053	+	chr22:17565843-17596583	1.83203	5e-05	0.00352391
COL8A2	1296	Hyper-up	chr1	NM_005202	diffreps_peak_524	36562801	36563360	2.04257	2.75826e-05	0.000742364	-	chr1:36560836-36590821	1.75318	0.01065	0.193305
LINGO2	158038	Hypo-down	chr9	NM_152570	diffreps_peak_34303	27949121	27949440	2.04089	0.0182396	0.132234	-	chr9:27948075-28670283	-3.47405	0.03215	0.370567
CIITA	4261	Hyper-up	chr16	NM_000246	diffreps_peak_12308	10996514	10996658	2.03989	3.33815e-07	2.17e-05	+	chr16:10958770-11036878	1.57534	0.01535	0.242218
SIRPB2	284759	Hyper-up	chr20	NM_001122962	diffreps_peak_19720	1471961	1472233	2.03952	1.88173e-05	0.000540141	-	chr20:1422806-1472233	1.91127	0.00425	0.107645
ZNF514	84874	Hyper-up	chr2	NM_032788	diffreps_peak_17890	95814861	95815140	2.03748	2.52625e-06	0.000102732	-	chr2:95752951-95831158	2.03475	0.00175	0.0581085
C2orf81	388963	Hyper-up	chr2	NM_001145054	diffreps_peak_17692	74641721	74642440	2.03668	2.24061e-06	9.3e-05	-	chr2:74641303-74648718	2.34743	0.034	0.384182
TCEANC2	127428	Hyper-up	chr1	ENST00000234827	diffreps_peak_868	54564421	54564880	2.03607	7.38503e-07	3.89e-05	+	chr1:54519259-54578192	1.64174	0.012	0.20774
C19orf35	374872	Hyper-up	chr19	NM_198532	diffreps_peak_15202	2278921	2279112	2.03563	0.00638439	0.0593684	-	chr19:2274630-2282181	2.73475	0.0004	0.0197028
FAM46C	54855	Hypo-down	chr1	NM_017709	diffreps_peak_1755	118148603	118148775	2.03402	0.00140181	0.0182757	+	chr1:118148555-118170994	-2.22995	5e-05	0.00352391
RCBTB2	1102	Hyper-up	chr13	uc001vcj.3	diffreps_peak_9206	49109921	49110118	2.03351	0.00211546	0.0252214	-	chr13:49063094-49107369	1.57564	0.00245	0.0735454
SH2D3C	10044	Hyper-up	chr9	NM_170600	diffreps_peak_35739	130536268	130536746	2.03313	8.07046e-08	8.3e-06	-	chr9:130500595-130541020	1.77989	5e-05	0.00352391
ZBTB21	49854	Hypo-down	chr21	NM_020727	diffreps_peak_20776	43413541	43413880	2.03295	1.43939e-06	6.52e-05	-	chr21:43406939-43445060	-1.88714	0.0193	0.27356
WWC3	55841	Hyper-up	chrX	NM_015691	diffreps_peak_36078	10085341	10085729	2.03291	4.12013e-06	0.000153287	+	chrX:9983601-10112518	1.55376	0.0041	0.104888
SH2D3C	10044	Hyper-up	chr9	NM_005489	diffreps_peak_35736	130509425	130509550	2.03163	6.66257e-08	7.35e-06	-	chr9:130500595-130541020	1.77989	5e-05	0.00352391
LILRA1	11024	Hyper-up	chr19	NM_006863	diffreps_peak_16468	55112701	55112920	2.03158	8.57451e-07	4.35e-05	+	chr19:55084386-55150343	1.7883	0.00125	0.0450278
P2RY13	53829	Hyper-up	chr3	NM_176894	diffreps_peak_23458	151047268	151047337	2.0309	0.0414839	0.242681	-	chr3:150803483-151176497	1.78733	0.00015	0.00900556
CD14	929	Hyper-up	chr5	NM_000591	diffreps_peak_27781	140011312	140012320	2.02993	0.000621084	0.00955416	-	chr5:140011312-140013286	1.60536	5e-05	0.00352391
UBTD2	92181	Hyper-up	chr5	NM_152277	diffreps_peak_28085	171638721	171639231	2.02947	3.45851e-08	4.88e-06	-	chr5:171636643-171711075	1.56502	0.0111	0.198122
SMCO4	56935	Hyper-up	chr11	ENST00000525141	diffreps_peak_6378	93212221	93212450	2.02938	5.91885e-07	3.3e-05	-	chr11:93211637-93276674	2.33517	0.0007	0.0292998
USP36	57602	Hypo-down	chr17	NM_025090	diffreps_peak_14325	76803040	76803718	2.02937	2.18113e-06	9.1e-05	-	chr17:76783462-76837523	-1.91919	5e-05	0.00352391
TRIM7	81786	Hyper-up	chr5	NM_203293	diffreps_peak_28217	180622201	180622520	2.02806	0.0198406	0.1405	-	chr5:180618923-180632293	2.48618	0.0185	0.267609
HDHD1		Hyper-up	chrX	NM_001178135	diffreps_peak_36046	6975626	6975860	2.02773	0.000170885	0.00336611	-	chrX:6966960-7272851	1.53767	0.0379	0.406907
CCRL2	9034	Hypo-down	chr3	NM_003965	diffreps_peak_22274	46450441	46450880	2.02579	1.2446e-06	5.8e-05	+	chr3:46448653-46454488	-3.09423	5e-05	0.00352391
SLC29A3	55315	Hyper-up	chr10	NM_001174098	diffreps_peak_4329	73115837	73116006	2.02551	0.00462833	0.0462972	+	chr10:73079009-73123147	3.30628	0.0364	0.399169
PVR	5817	Hyper-up	chr19	NM_006505	diffreps_peak_16176	45168901	45169428	2.0251	0.00197184	0.0238675	+	chr19:45041044-45222031	1.54557	0.02155	0.294688
SPIN3	169981	Hyper-up	chrX	NM_001010862	diffreps_peak_36584	57021721	57021988	2.02379	0.00114525	0.0155431	-	chrX:57002802-57021988	1.78473	0.033	0.375749
MXRA7	439921	Hypo-down	chr17	NM_198530	diffreps_peak_14276	74681153	74681247	2.02246	0.00271228	0.0306548	-	chr17:74668009-74707098	-2.29749	5e-05	0.00352391
VPS37B	79720	Hypo-down	chr12	ENST00000371248	diffreps_peak_8641	123373841	123374160	2.02212	1.33465e-07	1.17e-05	-	chr12:123349881-123380991	-1.6041	5e-05	0.00352391
PVR	5817	Hyper-up	chr19	NM_006505	diffreps_peak_16174	45165021	45165520	2.02149	1.14836e-06	5.46e-05	+	chr19:45041044-45222031	1.54557	0.02155	0.294688
ACPP	55	Hyper-up	chr3	NM_001099	diffreps_peak_23238	132076741	132077080	2.02137	0.000812253	0.0118291	+	chr3:132036210-132087142	1.70446	0.0002	0.0113213
SCIMP	388325	Hyper-up	chr17	NM_207103	diffreps_peak_13283	5114161	5114250	2.02136	1.95661e-09	7.06e-07	-	chr17:5095378-5151364	1.60065	0.00015	0.00900556
TRIB1	10221	Hyper-up	chr8	NM_025195	diffreps_peak_33739	126445558	126445851	2.02093	0.00614733	0.0576927	+	chr8:126442562-126450647	1.73229	0.00075	0.0308139
SPATA6	54558	Hyper-up	chr1	NM_019073	diffreps_peak_796	48918701	48918803	2.02052	0.000408555	0.00683658	-	chr1:48761043-48937845	1.86224	0.0305	0.362081
SAMD9L	219285	Hyper-up	chr7	NM_152703	diffreps_peak_31674	92774044	92774146	2.01883	8.71867e-06	0.000284227	-	chr7:92759367-92777682	1.59322	0.00175	0.0581085
SIGLEC9	27180	Hyper-up	chr19	NM_014441	diffreps_peak_16338	51628136	51628652	2.01803	1.43245e-06	6.5e-05	+	chr19:51628164-51639908	2.00361	5e-05	0.00352391
TMCC3	57458	Hypo-down	chr12	NM_001301036	diffreps_peak_8320	94975397	94975700	2.01798	0.00421548	0.0430253	-	chr12:94960899-95044338	-2.48678	5e-05	0.00352391
ARHGAP31	57514	Hyper-up	chr3	NM_020754	diffreps_peak_22984	119136421	119136620	2.0176	7.35622e-06	0.000246546	+	chr3:119013219-119139561	1.518	0.00525	0.125486
PI16	221476	Hyper-up	chr6	NM_153370	diffreps_peak_28923	36922421	36922707	2.0154	0.00606826	0.0571523	+	chr6:36922208-36932613	2.20428	0.01465	0.236188
C14orf64		Hyper-up	chr14	ENST00000499006	diffreps_peak_10733	98444313	98444461	2.01503	4.10846e-05	0.00103102	-	chr14:98391946-98444461	1.53508	0.02485	0.320391
IQCE	23288	Hyper-up	chr7	NM_001287499	diffreps_peak_30600	2625881	2626005	2.01489	9.59757e-08	9.27e-06	+	chr7:2598631-2654368	1.63717	0.04125	0.425161
ALPK1	80216	Hyper-up	chr4	NM_025144	diffreps_peak_25345	113352421	113352820	2.01487	1.14368e-09	4.82e-07	+	chr4:113195697-113363776	1.73098	0.0011	0.0410337
SYTL2	54843	Hypo-down	chr11	NM_032943	diffreps_peak_6282	85456679	85456760	2.01389	1.56487e-07	1.3e-05	-	chr11:85405266-85522184	-2.31872	5e-05	0.00352391
CNR2	1269	Hyper-up	chr1	ENST00000536471	diffreps_peak_350	24200221	24200460	2.0135	0.000171841	0.00338151	-	chr1:24197015-24285549	1.60801	0.0023	0.0707091
ZNF491	126069	Hyper-up	chr19	NM_152356	diffreps_peak_15472	11917161	11917500	2.01305	0.00106685	0.0146829	+	chr19:11906898-11920437	3.11176	0.0034	0.0928413
IPO13	9670	Hyper-up	chr1	NM_014652	diffreps_peak_688	44415088	44415620	2.01268	5.27947e-08	6.37e-06	+	chr1:44412610-44433694	1.88562	0.00115	0.042367
SERPINA1	5265	Hyper-up	chr14	ENST00000556091	diffreps_peak_10671	94849301	94849716	2.01144	1.88608e-05	0.000541084	-	chr14:94843083-94857030	1.89995	5e-05	0.00352391
SPIN3	169981	Hyper-up	chrX	NM_001010862	diffreps_peak_36583	57020901	57021382	2.01004	1.73696e-05	0.000504815	-	chrX:57002802-57021988	1.78473	0.033	0.375749
PYGL	5836	Hyper-up	chr14	NM_002863	diffreps_peak_10023	51411001	51411248	2.00957	2.43825e-06	9.98e-05	-	chr14:51314839-51413305	1.91598	5e-05	0.00352391
KLF3	51274	Hypo-down	chr4	NM_016531	diffreps_peak_24440	38702601	38702860	2.00925	0.000205518	0.00391271	+	chr4:38614321-38702663	-1.58099	5e-05	0.00352391
OPRL1	4987	Hyper-up	chr20	NM_000913	diffreps_peak_20445	62729821	62731140	2.0091	9.03635e-09	2.06e-06	+	chr20:62711525-62731996	1.80872	0.00565	0.13111
CD33	945	Hyper-up	chr19	ENST00000436584	diffreps_peak_16347	51738849	51739020	2.00708	0.000165601	0.00328268	+	chr19:51728319-51747115	1.66201	0.0037	0.0984697
CRYBG3	131544	Hyper-up	chr3	NM_153605	diffreps_peak_22733	97562038	97562105	2.00638	1.09873e-06	5.28e-05	+	chr3:97595818-97691301	1.57407	0.0152	0.240917
RASSF4	83937	Hyper-up	chr10	NM_032023	diffreps_peak_4078	45478001	45478111	2.00532	5.38948e-07	3.09e-05	+	chr10:45306471-45676875	1.52671	0.0021	0.0662745
RNASEL	6041	Hyper-up	chr1	NM_021133	diffreps_peak_2707	182555361	182555560	2.00391	1.75933e-07	1.4e-05	-	chr1:182542768-182558391	1.68347	5e-05	0.00352391
SLC16A5	9121	Hyper-up	chr17	ENST00000538213	diffreps_peak_14225	73100361	73100505	2.00344	0.000576711	0.00900915	+	chr17:73083821-73102257	1.58639	0.0099	0.186603
ZNF658	26149	Hyper-up	chr9	NM_033160	diffreps_peak_34526	40774841	40775036	2.00203	0.00765934	0.0682576	-	chr9:40760699-40836415	1.68642	0.0209	0.287552
VASH1	22846	Hyper-up	chr14	NM_014909	diffreps_peak_10508	77244301	77244414	2.00118	0.0091365	0.0782036	+	chr14:77228531-77253067	1.83781	0.00065	0.0280633
ZNF804A	91752	Hyper-up	chr2	NM_194250	diffreps_peak_18932	185731095	185731239	2	0.00103551	0.0143426	+	chr2:185463092-185804219	2.02459	0.00515	0.124094

## Sheet: Supplementary Table 9
Supplementary Table 9. The list of lncRNAs with significant change in both m6A level and lncRNA transcript abundance in CAD group
Gene name	Chromosome	Pattern	m6A level change					LncRNA level change
			Peak ID	Peak start	Peak end	Fold change	P-value	Transcript ID	strand	Locus	Fold change	P-value
RP11-693J15.5	chr12	Hyper-up	diffreps_peak_8279	92879161	92879640	5.38175	3.7241e-07	ENSG00000205056	+	chr12:92813869-92885867	3.27313	5e-05
CTD-2044J15.2	chr5	Hyper-up	diffreps_peak_26287	6673821	6674200	3.41023	8.64735e-13	ENSG00000272520	+	chr5:6671218-6674499	2.9505	0.00045
RP11-229P13.20	chr9	Hyper-up	diffreps_peak_35917	139932141	139932380	2.55836	1.47295e-08	ENSG00000235117	+	chr9:139931491-139932407	2.80113	0.03145
LOC100506472	chr22	Hyper-up	diffreps_peak_21478	39830921	39831120	3.07203	1.00786e-07	LOC100506472	+	chr22:39795745-39833133	2.76972	0.03565
AL137655	chr3	Hyper-up	diffreps_peak_23980	197938616	197938681	2.00344	6.49614e-07	AL137655_2	+	chr3:197937115-197955678	2.65244	0.0012
LL21NC02-1C16.2	chr21	Hyper-up	diffreps_peak_20909	46356341	46356640	4.72396	4.61205e-09	ENSG00000272825	+	chr21:46352728-46359828	2.56033	0.0083
CTC-459F4.1	chr19	Hyper-up	diffreps_peak_15727	28249201	28249400	2.4564	0.00880502	ENSG00000261770	-	chr19:28175487-28475892	2.46579	0.0097
DLEU2	chr13	Hyper-up	diffreps_peak_9234	50567981	50568097	2.98278	6.95057e-09	DLEU2	-	chr13:50556687-51423190	2.459	0.0401
RP11-687F6.1	chr18	Hyper-up	diffreps_peak_14829	44383441	44383680	2.60049	3.39315e-05	ENSG00000267167	-	chr18:44383186-44383857	2.39375	0.0216
U73166.2	chr3	Hyper-up	diffreps_peak_22345	50299001	50299320	2.10267	0.00757715	ENSG00000230454	+	chr3:50297734-50300790	2.23767	0.00995
RP5-1086K13.1	chr1	Hyper-up	diffreps_peak_1727	117036021	117036280	2.38462	1.52025e-06	ENSG00000224950	-	chr1:117035644-117041834	2.23361	0.0027
BC080605	chr9	Hyper-up	diffreps_peak_34706	68414801	68414929	2.30686	6.53545e-06	BC080605	+	chr9:68409997-68418932	2.21628	0.00025
RP11-290F5.1	chr4	Hyper-up	diffreps_peak_26164	185286341	185286580	2.02004	0.031033	ENSG00000249096	-	chr4:185286335-185303460	2.155	0.0273
AL833181	chr2	Hyper-up	diffreps_peak_17409	60751623	60751720	2.17237	4.4543e-06	AL833181	-	chr2:60678301-60780915	1.98038	0.0105
LOC729737	chr1	Hyper-up	diffreps_peak_6	139241	139696	2.92085	1.41413e-06	LOC729737	-	chr1:89294-140566	1.9706	5e-05
RP11-428G5.5	chr12	Hyper-up	diffreps_peak_7471	32030441	32030780	4.03758	3.57804e-07	ENSG00000255760	-	chr12:32030012-32040137	1.9669	0.0455
LL22NC03-2H8.5	chr22	Hyper-up	diffreps_peak_21128	22639281	22641586	2.50725	7.94928e-05	ENSG00000272216	-	chr22:22638311-22641586	1.93158	0.0063
LINC00937	chr12	Hyper-up	diffreps_peak_7078	8449561	8449820	2.48997	8.48836e-06	ENSG00000226091	-	chr12:8407122-8549399	1.83513	0.0376
ZNRD1-AS1	chr6	Hyper-up	diffreps_peak_28739	29984041	29984240	2.76316	8.0242e-05	ENSG00000204623	-	chr6:29968787-30032686	1.77305	0.0137
GS1-124K5.11	chr7	Hyper-up	diffreps_peak_31286	66006441	66006980	2.09222	6.34203e-05	ENSG00000229180	-	chr7:65670185-66057394	1.71729	0.0061
LOC100129034	chr9	Hyper-up	diffreps_peak_35659	127116081	127116480	2.06955	1.37406e-07	LOC100129034	+	chr9:127115744-127177723	1.7159	5e-05
MIR4697HG	chr11	Hyper-up	diffreps_peak_6869	133766701	133767220	3.17103	1.19177e-07	MIR4697HG	-	chr11:133766329-133771635	1.71276	0.0013
AK308561	chr9	Hyper-up	diffreps_peak_34650	66455061	66455086	2.2593	6.45742e-07	AK308561	-	chr9:66454656-66457142	1.69879	0.0383
RP11-46C24.7	chr16	Hyper-up	diffreps_peak_13159	89281881	89282320	2.5094	2.25216e-07	ENSG00000259877	-	chr16:89281637-89284061	1.60671	0.0496
FLJ42627	chr16	Hyper-up	diffreps_peak_12202	2691361	2693180	2.20903	1.18439e-05	FLJ42627	+	chr16:2653350-2696130	1.60209	0.0364
RP11-452L6.5	chr16	Hyper-up	diffreps_peak_12617	31469101	31469480	2.1197	6.99939e-10	ENSG00000260267	-	chr16:31468031-31478487	1.54275	0.01975
LL0XNC01-7P3.1	chrX	Hyper-up	diffreps_peak_36447	49131721	49131980	2.22719	0.000104588	ENSG00000270012	+	chrX:49126305-49157929	1.53303	0.0495
AC007278.3	chr2	Hypo-down	diffreps_peak_18037	103056052	103056180	2.96365	4.8576e-07	ENSG00000234389	+	chr2:103035148-103069025	-2.87408	0.0053
CTA-29F11.1	chr22	Hypo-down	diffreps_peak_21600	47157790	47158460	2.32458	9.89455e-06	ENSG00000260708	-	chr22:47157790-47158460	-2.91707	0.00015
DKFZp586E1322	chr21	Hypo-down	diffreps_peak_20965	47550121	47550640	2.41314	1.82236e-07	DKFZp586E1322	+	chr21:47518010-47552763	-2.92049	0.04075
CCDC173	chr2	Hypo-down	diffreps_peak_18761	170545141	170545440	7.17467	2.95694e-07	CCDC173	-	chr2:170501934-170550943	-8.64065	5e-05
